# Supplementary material for: Strepyrrolins A–E, five pyrrole–sesquiterpene hybrids from Streptomyces sp. KIB 015, revealing a new formation logic of pyrroles by isotope labeling
Source: Royal Society of Chemistry journal article supplement (doi:10.1039/d2qo01767a), 2022-12-19
Supplement: d2qo01767a1.pdf [file d2qo01767a1.pdf]

## Supporting Information

### **Strepyrrolins A–E, five pyrrole-sesquiterpene hybrids from *Streptomyces* sp. KIB 015, revealing a new formation logic of pyrroles by isotope labeling**

Li Wang,<sup>a,b,‡</sup> Zhi Zhou,<sup>b,c,d,‡</sup> Jian-Ping Huang,<sup>a,b</sup> Liang Zhang,<sup>b</sup> Xiaotao Tuo,<sup>a,b</sup> Zhiyin Yu,<sup>a</sup> Sheng-Xiong Huang,<sup>b</sup> Yang Liu,<sup>c,d,\*</sup> Jing Yang<sup>a,b,\*</sup>

<sup>a</sup>*State Key Laboratory of Southwestern Chinese Medicine Resources, and Innovative Institute of Chinese Medicine and Pharmacy, Chengdu University of Traditional Chinese Medicine, Chengdu 611137, P. R. China;*

<sup>b</sup>*State Key Laboratory of Phytochemistry and Plant Resources in West China, and CAS Center for Excellence in Molecular Plant Sciences, Kunming Institute of Botany, Chinese Academy of Sciences, Kunming 650201, P. R. China;*

<sup>c</sup>*Department of Gastroenterology, The First Affiliated Hospital of Chengdu Medical College, Chengdu 610500, P. R. China;*

<sup>d</sup>*Research Center, Chengdu Medical College, Chengdu 610500, P. R. China*

<sup>‡</sup>These authors contributed equally.

\*To whom correspondence should be addressed. Tel: +86-871-65215112.

E-mail: liuyang@cmc.edu.cn (Y.L.)

yangjingc@mail.kib.ac.cn (J.Y.)

## Contents

|                                                                                                                                                                                         |     |
|-----------------------------------------------------------------------------------------------------------------------------------------------------------------------------------------|-----|
| <b>Scheme S1.</b> Hypothetical formation mechanisms of compounds <b>3</b> and <b>4</b> from epoxide <b>8</b> .....                                                                      | S5  |
| <b>Table S1.</b> Detailed 2D-NMR data of compound <b>1</b> .....                                                                                                                        | S6  |
| <b>Table S2.</b> Detailed 2D-NMR data of compound <b>2</b> .....                                                                                                                        | S7  |
| <b>Table S3.</b> Detailed 2D-NMR data of compound <b>3</b> .....                                                                                                                        | S8  |
| <b>Table S4.</b> Detailed 2D-NMR data of compound <b>4</b> .....                                                                                                                        | S9  |
| <b>Table S5.</b> Detailed 2D-NMR data of compound <b>5</b> .....                                                                                                                        | S10 |
| <b>Table S6.</b> Details of feeding experiments using several isotope labeling substrates. ....                                                                                         | S11 |
| <b>Table S7.</b> Energies and populations of predominant conformers of (10 <i>S</i> , 11 <i>R</i> , 12 <i>S</i> , 15 <i>R</i> )- <b>1</b> at M06-2X/6-31G(d,p) theory level in gas..... | S11 |
| <b>Table S8.</b> Energies and populations of predominant conformers of (11 <i>S</i> , 12 <i>S</i> , 15 <i>R</i> )- <b>3</b> at B3LYP/6-31G(d,p) theory level in gas.....                | S12 |
| <b>Table S9.</b> Energies and populations of predominant conformers of (11 <i>S</i> , 12 <i>S</i> , 15 <i>S</i> )- <b>4</b> at CAM-B3LYP/def2-TZVP theory level in gas.....             | S13 |
| <b>Table S10.</b> Energies and populations of predominant conformers of (11 <i>S</i> , 12 <i>S</i> )- <b>5</b> at CAM-B3LYP/def2-TZVP theory level in gas.....                          | S13 |
| <b>Table S11.</b> DFT Coordinates of the optimized conformers of (10 <i>S</i> , 11 <i>R</i> , 12 <i>S</i> , 15 <i>R</i> )- <b>1</b> at M06-2X/6-31G(d,p) theory level.....              | S14 |
| <b>Table S12.</b> DFT Coordinates of the optimized conformers of (11 <i>S</i> , 12 <i>S</i> , 15 <i>R</i> )- <b>3</b> at B3LYP/6-31G(d,p) theory level .....                            | S17 |
| <b>Table S13.</b> DFT Coordinates of the optimized conformers of (11 <i>S</i> , 12 <i>S</i> , 15 <i>S</i> )- <b>4</b> at CAM-B3LYP/def2-TZVP theory level. ....                         | S25 |
| <b>Table S14.</b> DFT Coordinates of the optimized conformers of (11 <i>S</i> , 12 <i>S</i> )- <b>5</b> at CAM-B3LYP/def2-TZVP theory level .....                                       | S29 |
| <b>Table S15.</b> MIC values (µg/mL) of the active compounds in the antibacterial bioassay .....                                                                                        | S31 |
| <b>Figure S1.</b> Chemical structures of previously reported pyrrolo-sesquiterpenes .....                                                                                               | S31 |
| <b>Figure S2.</b> Key 2D NMR correlations of compounds <b>3–5</b> .....                                                                                                                 | S32 |
| <b>Figure S3.</b> View of the pack drawing of strepyrrolin A ( <b>1</b> ).....                                                                                                          | S33 |
| <b>Figure S4.</b> View of the pack drawing of compound <b>6</b> .....                                                                                                                   | S34 |
| <b>Figure S5.</b> Calculated and experimental ECD spectra of compounds <b>1</b> , <b>3</b> , <b>4</b> , and <b>5</b> .....                                                              | S35 |
| <b>Figure S6.</b> HR-ESI-MS spectrum of compound <b>3</b> fed with [ <sup>13</sup> C <sub>5</sub> , <sup>15</sup> N]-L-Pro .....                                                        | S36 |
| <b>Figure S7.</b> HR-ESI-MS spectrum ( <i>m/z</i> [M + K] <sup>+</sup> ) of compound <b>3</b> fed with [ <sup>13</sup> C <sub>5</sub> , <sup>15</sup> N]-L-Glu.....                     | S36 |
| <b>Figure S8.</b> <sup>13</sup> C NMR (200 MHz, CD <sub>3</sub> OD) spectrum of compound <b>3</b> fed with [ <sup>13</sup> C <sub>5</sub> , <sup>15</sup> N]-L-Glu .....                | S36 |
| <b>Figure S9.</b> The multiplicity analysis of labeled carbons of compound <b>3</b> fed with [ <sup>13</sup> C <sub>5</sub> , <sup>15</sup> N]-L-Glu .....                              | S37 |

|                                                                                                                                                                                                           |     |
|-----------------------------------------------------------------------------------------------------------------------------------------------------------------------------------------------------------|-----|
| <b>Figure S10.</b> $^1\text{H}$ - $^{15}\text{N}$ HMBC (800 MHz, $\text{CD}_3\text{OD}$ ) spectrum of compound <b>3</b> fed with [ $^{13}\text{C}_5$ , $^{15}\text{N}$ ]-L-Glu.....                       | S38 |
| <b>Figure S11.</b> HR-ESI-MS spectrum ( $m/z$ [ $\text{M} + \text{Na}$ ] $^+$ ) of compound <b>3</b> fed with $^{13}\text{C}_2$ -Gly.....                                                                 | S38 |
| <b>Figure S12.</b> $^{13}\text{C}$ NMR (200 MHz, $\text{CD}_3\text{OD}$ ) spectrum of compound <b>3</b> fed with $^{13}\text{C}_2$ -Gly .....                                                             | S39 |
| <b>Figure S13.</b> The multiplicity analysis of labeled carbons of compound <b>3</b> fed with $^{13}\text{C}_2$ -Gly.....                                                                                 | S39 |
| <b>Figure S14.</b> HR-ESI-MS spectrum ( $m/z$ [ $\text{M} + \text{K}$ ] $^+$ ) of compound <b>3</b> fed with $^{13}\text{C}_2$ -sodium acetate .....                                                      | S40 |
| <b>Figure S15.</b> $^{13}\text{C}$ NMR (200 MHz, $\text{CD}_3\text{OD}$ ) spectrum of compound <b>3</b> fed with $^{13}\text{C}_2$ -sodium acetate.....                                                   | S40 |
| <b>Figure S16.</b> The multiplicity analysis of labeled carbons of compound <b>3</b> fed with $^{13}\text{C}_2$ -sodium acetate.....                                                                      | S41 |
| <b>Figure S17.</b> HR-ESI-MS spectrum ( $m/z$ [ $\text{M} + \text{K}$ ] $^+$ ) of compound <b>3</b> fed with $^{13}\text{C}_6$ -glucose .....                                                             | S42 |
| <b>Figure S18.</b> $^{13}\text{C}$ NMR (200 MHz, $\text{CD}_3\text{OD}$ ) spectrum of compound <b>3</b> fed with $^{13}\text{C}_6$ -glucose .....                                                         | S42 |
| <b>Figure S19.</b> The multiplicity analysis of labeled carbons of compound <b>3</b> fed with $^{13}\text{C}_6$ -glucose.....                                                                             | S43 |
| <b>Figure S20.</b> Selective gradient COSY (200 MHz) spectrum targeting C-4 of compound <b>3</b> fed with $^{13}\text{C}_6$ -glucose .....                                                                | S44 |
| <b>Figure S21.</b> 1, <i>n</i> -ADEQUATE (800 MHz, $\text{CD}_3\text{OD}$ ) spectrum of compound <b>3</b> fed with $^{13}\text{C}_6$ -glucose .....                                                       | S44 |
| <b>Figure S22.</b> The analyses of labeling pattern of isoprenic units and $^{13}\text{C}/^{13}\text{C}$ couplings in terpenoid moiety of <b>3</b> after incorporation of $^{13}\text{C}_6$ -glucose..... | S45 |
| <b>Figure S23.</b> HR-ESI-MS spectrum of compound <b>3</b> fed with [ $^{13}\text{C}_3$ , $^{15}\text{N}$ ]-L-Ala.....                                                                                    | S46 |
| <b>Figure S24.</b> $^{13}\text{C}$ NMR (200 MHz, $\text{CD}_3\text{OD}$ ) spectrum of compound <b>3</b> fed with [ $^{13}\text{C}_3$ , $^{15}\text{N}$ ]-L-Ala .....                                      | S46 |
| <b>Figure S25.</b> The multiplicity analysis of labeled carbons of compound <b>3</b> fed with [ $^{13}\text{C}_3$ , $^{15}\text{N}$ ]-L-Ala.....                                                          | S47 |
| <b>Figure S26.</b> $^1\text{H}$ - $^{15}\text{N}$ HMBC (800 MHz, $\text{CD}_3\text{OD}$ ) spectrum of compound <b>3</b> fed with [ $^{13}\text{C}_3$ , $^{15}\text{N}$ ]-L-Ala.....                       | S48 |
| <b>Figure S27.</b> HR-ESI-MS spectrum ( $m/z$ [ $\text{M} + \text{K}$ ] $^+$ ) of compound <b>3</b> fed with $^{13}\text{C}_3$ -glycerol.....                                                             | S48 |
| <b>Figure S28.</b> $^{13}\text{C}$ NMR (200 MHz, $\text{CD}_3\text{OD}$ ) spectrum of compound <b>3</b> fed with $^{13}\text{C}_3$ -glycerol.....                                                         | S49 |
| <b>Figure S29.</b> The multiplicity analysis of labeled carbons of compound <b>3</b> fed with $^{13}\text{C}_3$ -glycerol .....                                                                           | S50 |
| <b>Figure S30.</b> Selective gradient COSY (200 MHz) spectra targeting C-4 ( <b>A</b> ) and C-3 ( <b>B</b> ) of compound <b>3</b> fed with $^{13}\text{C}_3$ -glycerol .....                              | S51 |
| <b>Figure S31.</b> 1, <i>n</i> -ADEQUATE (800 MHz, $\text{CD}_3\text{OD}$ ) spectrum of compound <b>3</b> fed with $^{13}\text{C}_3$ -glycerol.....                                                       | S51 |
| <b>Figure S32.</b> HR-ESI-MS spectra ( $m/z$ [ $\text{M} + \text{Na}$ ] $^+$ ) of compound <b>3</b> fed with $^{15}\text{NH}_4\text{Cl}$ .....                                                            | S52 |
| <b>Figure S33.</b> $^1\text{H}$ NMR (500 MHz) spectrum of <b>1</b> in $\text{CD}_3\text{OD}$ . .....                                                                                                      | S53 |
| <b>Figure S34.</b> $^{13}\text{C}$ NMR (125 MHz) spectrum of <b>1</b> in $\text{CD}_3\text{OD}$ .....                                                                                                     | S53 |
| <b>Figure S35.</b> $^1\text{H}$ - $^1\text{H}$ COSY (500 MHz) spectrum of <b>1</b> in $\text{CD}_3\text{OD}$ .....                                                                                        | S54 |
| <b>Figure S36.</b> HSQC (500 MHz) spectrum of <b>1</b> in $\text{CD}_3\text{OD}$ .....                                                                                                                    | S54 |
| <b>Figure S37.</b> HMBC (500 MHz) spectrum of <b>1</b> in $\text{CD}_3\text{OD}$ .....                                                                                                                    | S55 |
| <b>Figure S38.</b> ROESY (500 MHz) spectrum of <b>1</b> in $\text{CD}_3\text{OD}$ .....                                                                                                                   | S55 |
| <b>Figure S39.</b> HR-ESI-MS spectrum of <b>1</b> .....                                                                                                                                                   | S56 |
| <b>Figure S40.</b> IR spectrum of <b>1</b> . .....                                                                                                                                                        | S56 |
| <b>Figure S41.</b> $^1\text{H}$ NMR (600 MHz) spectrum of <b>2</b> in $\text{CD}_3\text{OD}$ .....                                                                                                        | S57 |

|                                                                                                                    |     |
|--------------------------------------------------------------------------------------------------------------------|-----|
| <b>Figure S42.</b> $^{13}\text{C}$ NMR (150 MHz) spectrum of <b>2</b> in $\text{CD}_3\text{OD}$ .....              | S57 |
| <b>Figure S44.</b> HSQC (600 MHz) spectrum of <b>2</b> in $\text{CD}_3\text{OD}$ .....                             | S58 |
| <b>Figure S45.</b> HMBC (600 MHz) spectrum of <b>2</b> in $\text{CD}_3\text{OD}$ .....                             | S59 |
| <b>Figure S46.</b> ROESY (600 MHz) spectrum of <b>2</b> in $\text{CD}_3\text{OD}$ .....                            | S59 |
| <b>Figure S47.</b> HR-ESI-MS spectrum of <b>2</b> .....                                                            | S60 |
| <b>Figure S48.</b> IR spectrum of <b>2</b> .....                                                                   | S60 |
| <b>Figure S49.</b> $^1\text{H}$ NMR (600 MHz) spectrum of crystals obtained from <b>2</b> .....                    | S61 |
| <b>Figure S50.</b> $^{13}\text{C}$ NMR (150 MHz) spectrum of crystals obtained from <b>2</b> .....                 | S61 |
| <b>Figure S51.</b> $^1\text{H}$ NMR (600 MHz) spectrum of <b>3</b> in $\text{CD}_3\text{OD}$ .....                 | S62 |
| <b>Figure S52.</b> $^{13}\text{C}$ NMR (150 MHz) spectrum of <b>3</b> in $\text{CD}_3\text{OD}$ .....              | S62 |
| <b>Figure S53.</b> $^1\text{H}$ - $^1\text{H}$ COSY (600 MHz) spectrum of <b>3</b> in $\text{CD}_3\text{OD}$ ..... | S63 |
| <b>Figure S54.</b> HSQC (600 MHz) spectrum of <b>3</b> in $\text{CD}_3\text{OD}$ .....                             | S63 |
| <b>Figure S55.</b> HMBC (600 MHz) spectrum of <b>3</b> in $\text{CD}_3\text{OD}$ .....                             | S64 |
| <b>Figure S56.</b> ROESY (600 MHz) spectrum of <b>3</b> in $\text{CD}_3\text{OD}$ .....                            | S64 |
| <b>Figure S57.</b> HR-ESI-MS spectrum of <b>3</b> .....                                                            | S65 |
| <b>Figure S58.</b> IR spectrum of <b>3</b> .....                                                                   | S65 |
| <b>Figure S59.</b> $^1\text{H}$ NMR (600 MHz) spectrum of <b>4</b> in $\text{CD}_3\text{OD}$ .....                 | S66 |
| <b>Figure S60.</b> $^{13}\text{C}$ NMR (150 MHz) spectrum of <b>4</b> in $\text{CD}_3\text{OD}$ .....              | S66 |
| <b>Figure S61.</b> $^1\text{H}$ - $^1\text{H}$ COSY (600 MHz) spectrum of <b>4</b> in $\text{CD}_3\text{OD}$ ..... | S67 |
| <b>Figure S62.</b> HSQC (600 MHz) spectrum of <b>4</b> in $\text{CD}_3\text{OD}$ .....                             | S67 |
| <b>Figure S63.</b> HMBC (600 MHz) spectrum of <b>4</b> in $\text{CD}_3\text{OD}$ .....                             | S68 |
| <b>Figure S64.</b> ROESY (600 MHz) spectrum of <b>4</b> in $\text{CD}_3\text{OD}$ .....                            | S68 |
| <b>Figure S65.</b> HR-ESI-MS spectrum of <b>4</b> .....                                                            | S69 |
| <b>Figure S66.</b> IR spectrum of <b>4</b> .....                                                                   | S69 |
| <b>Figure S67.</b> $^1\text{H}$ NMR (600 MHz) spectrum of <b>5</b> in $\text{CD}_3\text{OD}$ .....                 | S70 |
| <b>Figure S68.</b> $^{13}\text{C}$ NMR (150 MHz) spectrum of <b>5</b> in $\text{CD}_3\text{OD}$ .....              | S70 |
| <b>Figure S69.</b> $^1\text{H}$ - $^1\text{H}$ COSY (600 MHz) spectrum of <b>5</b> in $\text{CD}_3\text{OD}$ ..... | S71 |
| <b>Figure S70.</b> HSQC (600 MHz) spectrum of <b>5</b> in $\text{CD}_3\text{OD}$ .....                             | S71 |
| <b>Figure S71.</b> HMBC (600 MHz) spectrum of <b>5</b> in $\text{CD}_3\text{OD}$ .....                             | S72 |
| <b>Figure S72.</b> ROESY (600 MHz) spectrum of <b>5</b> in $\text{CD}_3\text{OD}$ .....                            | S72 |
| <b>Figure S73.</b> HR-ESI-MS spectrum of <b>5</b> .....                                                            | S73 |
| <b>Figure S74.</b> IR spectrum of <b>5</b> .....                                                                   | S73 |



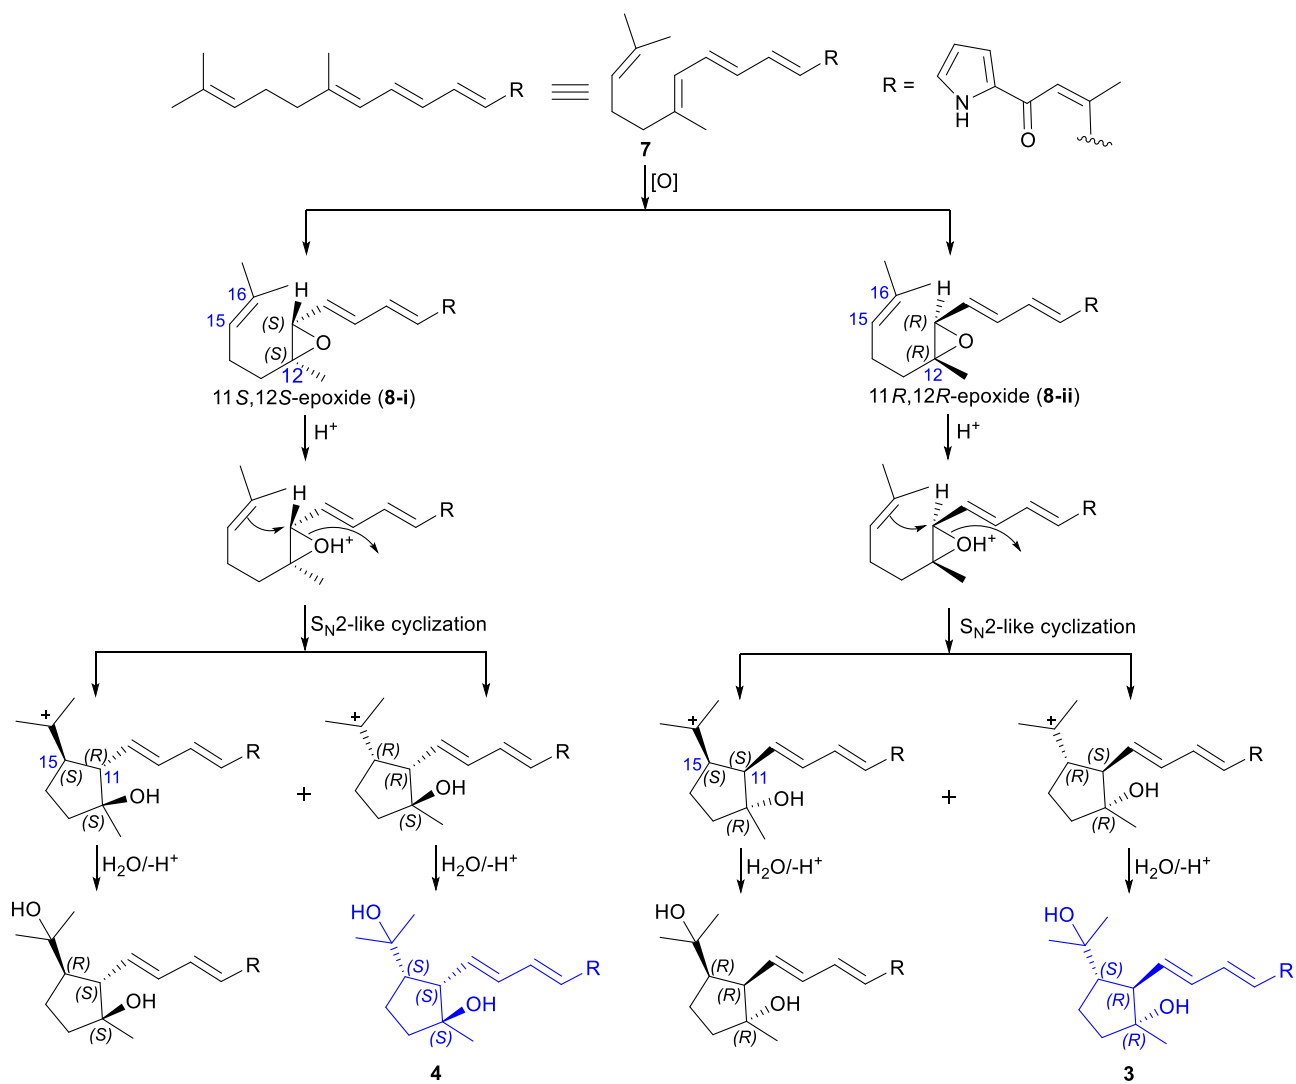

**Scheme S1.** Hypothetical formation mechanisms of compounds **3** and **4** from epoxide **8**.

**Table S1.** Detailed 2D-NMR data of compound **1**.

| No. | $\delta_H$                             | $\delta_C$               | HMBC                              | COSY | ROESY      |
|-----|----------------------------------------|--------------------------|-----------------------------------|------|------------|
| 2   | 7.06 (1H, overlapped)                  | 126.93 (CH)              | C-3, C-4, C-5                     | H-3  |            |
| 3   | 6.24 (1H, dd, $J = 3.6, 2.6$ Hz)       | 111.25 (CH)              | C-4, C-2, C-5                     |      |            |
| 4   | 7.07 (1H, overlapped)                  | 119.04 (CH)              | C-3, C-2, C-5, C-6                | H-3  |            |
| 5   |                                        | 133.00 (C)               |                                   |      |            |
| 6   |                                        | 189.58 (C)               |                                   |      |            |
| 7   | 3.48 (2H, br s)                        | 49.61 (CH <sub>2</sub> ) | C-6, C-8, C-9, C-18               |      | H-4        |
| 8   |                                        | 136.23 (C)               |                                   |      |            |
| 9   | 5.41 (1H, dd, $J = 9.0, 1.4$ Hz)       | 131.53 (CH)              | C-18, C-7, C-11, C-10, C-8, C-6   | H-7  | H-7        |
| 10  | 4.27 (1H, t like, $J = 8.7$ Hz)        | 77.02 (CH)               | C-11, C-12, C-15, C-8, C-9, C-16  | H-9  |            |
| 11  | 2.41 (1H, td, $J = 8.7, 1.0$ Hz)       | 65.51 (CH)               | C-14, C-13, C-15, C-10, C-12, C-9 | H-10 | H-9        |
| 12  |                                        | 81.37 (C)                |                                   |      |            |
| 13a | 1.83 (1H, m)                           | 40.60 (CH <sub>2</sub> ) | C-14, C-12                        |      | H-10       |
| 13b | 1.70 (1H, m)                           |                          | C-14, C-15, C-11, C-12            |      |            |
| 14a | 1.89 (1H, m)                           | 25.61 (CH <sub>2</sub> ) | C-15, C-16                        | H-15 | H-10       |
| 14b | 1.72 (1H, m)                           |                          | C-15, C-12, C-16                  | H-15 |            |
| 15  | 2.74 (1H, ddd, $J = 9.5, 8.7, 4.5$ Hz) | 55.45 (CH)               | C-14, C-17, C-13, C-11, C-10      | H-11 | H-11       |
| 16  |                                        | 84.30 (C)                |                                   |      |            |
| 17  | 1.26 (3H, s)                           | 31.86 (CH <sub>3</sub> ) | C-20, C-15, C-16                  |      |            |
| 18  | 1.78 (3H, br d, $J = 1.0$ Hz)          | 17.39 (CH <sub>3</sub> ) | C-7, C-9, C-8                     | H-9  | H-10       |
| 19  | 1.15 (3H, s)                           | 24.55 (CH <sub>3</sub> ) | C-11, C-12, C-13                  |      | H-10, H-11 |
| 20  | 1.22 (3H, s)                           | 24.07 (CH <sub>3</sub> ) | C-17, C-15, C-16                  |      | H-10       |

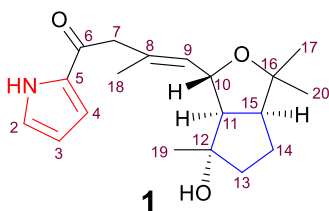

**Table S2.** Detailed 2D-NMR data of compound **2**.

| No. | $\delta_H$                             | $\delta_C$               | HMBC                               | COSY               | ROESY              |
|-----|----------------------------------------|--------------------------|------------------------------------|--------------------|--------------------|
| 2   | 7.03 (1H, dd, $J = 2.1, 1.5$ Hz)       | 126.14 (CH)              | C-3, C-4, C-5                      | H-3                |                    |
| 3   | 6.22 (1H, dd, $J = 3.6, 1.2$ Hz)       | 111.03 (CH)              | C-4, C-2, C-5                      |                    |                    |
| 4   | 6.96 (1H, dd, $J = 3.6, 1.2$ Hz)       | 117.01 (CH)              | C-3, C-2, C-5                      | H-3                | H-7                |
| 5   |                                        | 135.16 (C)               |                                    |                    |                    |
| 6   |                                        | 182.13 (C)               |                                    |                    |                    |
| 7   | 6.70 (1H, br t, $J = 1.2$ Hz)          | 122.84 (CH)              | C-18, C-9, C-10, C-8, C-6          | H <sub>3</sub> -18 |                    |
| 8   |                                        | 157.39 (C)               |                                    |                    |                    |
| 9a  | 3.33 (1H, overlapped)                  | 42.73 (CH <sub>2</sub> ) | C-18, C-11, C-10, C-7, C-8, C-6    | H-7, H-10          | H <sub>3</sub> -19 |
| 9b  | 2.65 (1H, dd, $J = 12.9, 9.9$ Hz)      |                          | C-18, C-11, C-10, C-7, C-8, C-6    | H-10               | H <sub>3</sub> -18 |
| 10  | 3.91 (1H, ddd, $J = 9.6, 8.1, 3.6$ Hz) | 81.04 (CH)               | C-9, C-11, C-12, C-16, C-8         |                    | H <sub>3</sub> -19 |
| 11  | 2.42 (1H, t like, $J = 7.9$ Hz)        | 65.34 (CH)               | C-14, C-13, C-9, C-15, C-10, C-12  | H-10               |                    |
| 12  |                                        | 82.04 (C)                |                                    |                    |                    |
| 13a | 1.77 (1H, m)                           | 40.22 (CH <sub>2</sub> ) | C-14, C-15, C-12                   |                    | H-10               |
| 13b | 1.66 (1H, overlapped)                  |                          | C-14, C-15, C-12                   | H-11               |                    |
| 14a | 1.85 (1H, m)                           | 25.32 (CH <sub>2</sub> ) | C-13, C-15, C-11, C-12, C-16       | H-15               |                    |
| 14b | 1.67 (1H, overlapped)                  |                          | C-13, C-15, C-11, C-12, C-16       | H-15, H-11         |                    |
| 15  | 2.70 (1H, ddd, $J = 9.6, 7.8, 4.5$ Hz) | 55.24 (CH)               | C-20, C-14, C-17, C-13, C-11, C-10 | H-11               | H-11               |
| 16  |                                        | 84.30 (C)                |                                    |                    |                    |
| 17  | 1.27 (3H, s)                           | 31.89 (CH <sub>3</sub> ) | C-20, C-15, C-16                   |                    | H-10               |
| 18  | 2.08 (3H, br d, $J = 1.2$ Hz)          | 27.59 (CH <sub>3</sub> ) | C-9, C-10, C-7, C-8, C-6           |                    | H-7                |
| 19  | 1.44 (3H, s)                           | 24.69 (CH <sub>3</sub> ) | C-13, C-11, C-12                   |                    |                    |
| 20  | 1.17 (3H, s)                           | 24.50 (CH <sub>3</sub> ) | C-17, C-15, C-16                   |                    |                    |

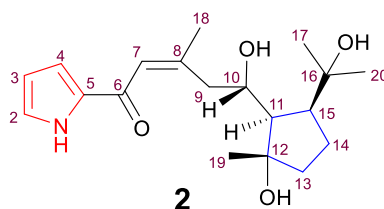

**Table S3.** Detailed 2D-NMR data of compound **3**.

| No. | $\delta_H$                        | $\delta_C$               | HMBC                                     | COSY               | ROESY      |
|-----|-----------------------------------|--------------------------|------------------------------------------|--------------------|------------|
| 2   | 7.06 (1H, dd, $J = 2.4, 1.2$ Hz)  | 126.57 (CH)              | C-3, C-4, C-5, C-6                       | H-3                |            |
| 3   | 6.23 (1H, dd, $J = 3.8, 2.4$ Hz)  | 111.23 (CH)              | C-4, C-2, C-5                            |                    |            |
| 4   | 6.98 (1H, dd, $J = 3.8, 1.2$ Hz)  | 117.37 (CH)              | C-3, C-2, C-5                            | H-3                | H-7        |
| 5   |                                   | 135.40 (C)               |                                          |                    |            |
| 6   |                                   | 182.37 (C)               |                                          |                    |            |
| 7   | 6.62 (1H, s)                      | 122.22 (CH)              | C-8, C-9, C-18                           |                    |            |
| 8   |                                   | 150.63 (C)               |                                          |                    |            |
| 9   | 7.66 (1H, d, $J = 15.8$ Hz)       | 130.55 (CH)              | C-18, C-11, C-7, C-8                     |                    | H-11       |
| 10  | 6.08 (1H, dd, $J = 15.8, 9.7$ Hz) | 142.37 (CH)              | C-15, C-11, C-12, C-8                    | H-9                |            |
| 11  | 2.56 (1H, dd, $J = 9.7, 7.1$ Hz)  | 57.68 (CH)               | C-13, C-15, C-16, C-12, C-19, C-9, C-10  | H-10               |            |
| 12  |                                   | 82.56 (C)                |                                          |                    |            |
| 13a | 1.72 (1H, dd, $J = 8.2, 5.4$ Hz)  | 41.14 (CH <sub>2</sub> ) | C-14, C-15, C-11, C-12                   |                    |            |
| 13b | 1.67 (1H, dd, $J = 8.2, 4.5$ Hz)  |                          | C-14, C-15, C-11, C-12                   | H <sub>2</sub> -14 | H-10, H-15 |
| 14  | 1.78 (2H, m)                      | 25.17 (CH <sub>2</sub> ) | C-13, C-15, C-16, C-12                   | H-15               |            |
| 15  | 2.03 (1H, dt, $J = 9.1, 7.1$ Hz)  | 56.14 (CH)               | C-14, C-17, C-13, C-11, C-16, C-12, C-10 | H-11               | H-10       |
| 16  |                                   | 73.25 (C)                |                                          |                    |            |
| 17  | 1.20 (3H, s)                      | 28.31 (CH <sub>3</sub> ) | C-20, C-15, C-16                         |                    |            |
| 18  | 2.11 (3H, br d, $J = 1.0$ Hz)     | 21.53 (CH <sub>3</sub> ) | C-7, C-8, C-9                            |                    | H-7, H-10  |
| 19  | 1.14 (3H, s)                      | 24.17 (CH <sub>3</sub> ) | C-11, C-12, C-13                         |                    | H-10       |
| 20  | 1.17 (3H, s)                      | 28.66 (CH <sub>3</sub> ) | C-17, C-15, C-16                         |                    |            |

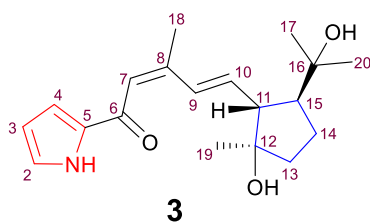

**Table S4.** Detailed 2D-NMR data of compound **4**.

| No. | $\delta_H$                              | $\delta_C$               | HMBC                                     | COSY               | ROESY              |
|-----|-----------------------------------------|--------------------------|------------------------------------------|--------------------|--------------------|
| 2   | 7.06 (1H, dd, $J = 2.4, 1.4$ Hz)        | 126.46 (CH)              | C-3, C-4, C-5                            | H-3                |                    |
| 3   | 6.23 (1H, dd, $J = 3.9, 2.4$ Hz)        | 111.20 (CH)              | C-4, C-2, C-5                            |                    |                    |
| 4   | 6.97 (1H, dd, $J = 3.9, 1.4$ Hz)        | 117.24 (CH)              | C-3, C-2, C-5, C-6                       | H-3                | H-7                |
| 5   |                                         | 135.48 (C)               |                                          |                    |                    |
| 6   |                                         | 182.41 (C)               |                                          |                    |                    |
| 7   | 6.59 (1H, s)                            | 121.63 (CH)              | C-18, C-9, C-8, C-6                      | H-9                |                    |
| 8   |                                         | 150.90 (C)               |                                          |                    |                    |
| 9   | 7.66 (1H, d, $J = 15.8$ Hz)             | 130.30 (CH)              | C-18, C-11, C-12, C-7, C-8               |                    |                    |
| 10  | 6.12 (1H, dd, $J = 15.8, 11.1$ Hz)      | 140.34 (CH)              | C-15, C-11, C-12, C-9, C-8               | H-9                | H <sub>3</sub> -18 |
| 11  | 2.59 (1H, dd, $J = 11.1, 5.8$ Hz)       | 60.34 (CH)               | C-14, C-13, C-12, C-15, C-9, C-10        | H-10               | H-9                |
| 12  |                                         | 83.04 (C)                |                                          |                    |                    |
| 13a | 1.83 (1H, m)                            | 38.33 (CH <sub>2</sub> ) | C-14, C-19, C-15, C-12                   |                    | H-10               |
| 13b | 1.78 (1H, m)                            |                          | C-14, C-11, C-15, C-12                   |                    | H-15               |
| 14  | 1.91 (2H, m)                            | 23.63 (CH <sub>2</sub> ) | C-13, C-15, C-11, C-12, C-16             | H-13a, b           |                    |
| 15  | 2.67 (1H, ddd, $J = 10.2, 9.6, 5.8$ Hz) | 54.51 (CH)               | C-14, C-20, C-17, C-13, C-11, C-16, C-10 | H <sub>2</sub> -14 | H-11               |
| 16  |                                         | 72.80 (C)                |                                          |                    |                    |
| 17  | 1.19 (3H, s)                            | 30.45 (CH <sub>3</sub> ) | C-20, C-15, C-16, C-9                    |                    | H-10               |
| 18  | 2.09 (3H, br d, $J = 1.0$ Hz)           | 21.67 (CH <sub>3</sub> ) | C-6, C-7, C-8, C-9                       | H-7                | H-7                |
| 19  | 1.15 (3H, s)                            | 26.71 (CH <sub>3</sub> ) | C-11, C-12, C-13                         |                    | H-10; H-11         |
| 20  | 1.22 (3H, s)                            | 28.25 (CH <sub>3</sub> ) | C-15, C-16, C-17                         |                    |                    |

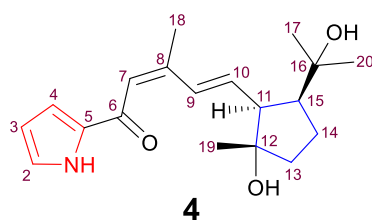

**Table S5.** Detailed 2D-NMR data of compound **5**.

| No. | $\delta_H$                        | $\delta_C$               | HMBC                        | COSY               | ROESY              |
|-----|-----------------------------------|--------------------------|-----------------------------|--------------------|--------------------|
| 2   | 7.06 (1H, dd, $J = 2.2, 1.2$ Hz)  | 126.47 (CH)              | C-3, C-4, C-5               | H-3                |                    |
| 3   | 6.23 (1H, dd, $J = 3.7, 2.2$ Hz)  | 111.19 (CH)              | C-4, C-2, C-5               |                    |                    |
| 4   | 6.97 (1H, dd, $J = 3.7, 1.2$ Hz)  | 117.28 (CH)              | C-3, C-2, C-5               | H-3                | H-7                |
| 5   |                                   | 135.48 (C)               |                             |                    |                    |
| 6   |                                   | 182.36 (C)               |                             |                    |                    |
| 7   | 6.59 (1H, br s)                   | 122.32 (CH)              | C-18, C-9, C-8, C-6         | H <sub>3</sub> -18 | H <sub>3</sub> -18 |
| 8   |                                   | 150.48 (C)               |                             |                    |                    |
| 9   | 7.66 (1H, d, $J = 15.8$ Hz)       | 130.26 (CH)              | C-18, C-11, C-7, C-8        |                    | H-11               |
| 10  | 5.90 (1H, dd, $J = 15.8, 9.0$ Hz) | 138.60 (CH)              | C-11, C-12, C-15, C-8       | H-9                | H <sub>3</sub> -18 |
| 11  | 3.14 (1H, d, $J = 9.0$ Hz)        | 60.28 (CH)               | C-14, C-13, C-12, C-9, C-10 | H-11               | H <sub>3</sub> -19 |
| 12  |                                   | 82.50 (C)                |                             |                    |                    |
| 13  | 1.75 (2H, m)                      | 38.69 (CH <sub>2</sub> ) | C-14, C-11, C-12            |                    | H-10               |
| 14a | 2.48 (1H, m)                      | 28.86 (CH <sub>2</sub> ) | C-13, C-15, C-16            | H <sub>2</sub> -13 |                    |
| 14b | 2.36 (1H, m)                      |                          | C-13, C-12, C-15, C-16      | H <sub>2</sub> -13 |                    |
| 15  |                                   | 137.49 (C)               |                             |                    |                    |
| 16  |                                   | 126.86 (C)               |                             |                    |                    |
| 17  | 1.61 (3H, s)                      | 21.22 (CH <sub>3</sub> ) | C-15, C-16                  |                    |                    |
| 18  | 2.07 (3H, br d, $J = 0.9$ Hz)     | 21.44 (CH <sub>3</sub> ) | C-7, C-8, C-9               |                    |                    |
| 19  | 1.23 (3H, s)                      | 25.24 (CH <sub>3</sub> ) | C-11, C-12, C-13            |                    | H-10               |
| 20  | 1.65 (3H, s)                      | 21.23 (CH <sub>3</sub> ) | C-15, C-16                  |                    |                    |

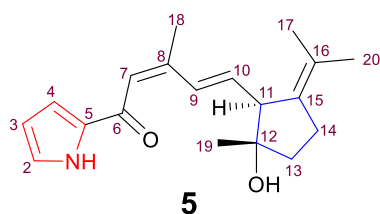

**Table S6.** Details of feeding experiments using several isotope labeling substrates.

| labeling substrates                                     | Solvent used to dissolve the labeling substrate | Quality of labeling substrate used | Final concentration of the feeding experiment | fermentation medium | fermentation scale in total | yield of compound <b>3</b> |
|---------------------------------------------------------|-------------------------------------------------|------------------------------------|-----------------------------------------------|---------------------|-----------------------------|----------------------------|
| [ <sup>13</sup> C <sub>5</sub> , <sup>15</sup> N]-L-Pro | dd H <sub>2</sub> O                             | 100 mg                             | 666 mg/L                                      | M15A <sup>a</sup>   | 150 mL                      | NP <sup>d</sup>            |
| [ <sup>13</sup> C <sub>5</sub> , <sup>15</sup> N]-L-Glu | 0.5N HCl                                        | 500 mg                             | 625 mg/L                                      | M15A <sup>a</sup>   | 800 mL                      | 0.8 mg                     |
| <sup>13</sup> C <sub>6</sub> -glucose                   | dd H <sub>2</sub> O                             | 1000 mg                            | 1250 mg/L                                     | M15B <sup>b</sup>   | 800 mL                      | 1.0 mg                     |
| <sup>13</sup> C <sub>2</sub> -Gly                       | dd H <sub>2</sub> O                             | 500 mg                             | 625 mg/L                                      | M15A <sup>a</sup>   | 800 mL                      | 0.5 mg                     |
| <sup>13</sup> C <sub>2</sub> -sodium acetate            | dd H <sub>2</sub> O                             | 1000 mg                            | 1250 mg/L                                     | M15B <sup>b</sup>   | 800 mL                      | 0.8 mg                     |
| <sup>13</sup> C <sub>3</sub> -glycerol                  | dd H <sub>2</sub> O                             | 1000 mg                            | 1250 mg/L                                     | M15B <sup>b</sup>   | 800 mL                      | 1.0 mg                     |
| [ <sup>13</sup> C <sub>3</sub> , <sup>15</sup> N]-L-Ala | dd H <sub>2</sub> O                             | 500 mg                             | 714 mg/L                                      | M15A <sup>a</sup>   | 700 mL                      | 0.6 mg                     |
| <sup>15</sup> NH <sub>4</sub> Cl                        | dd H <sub>2</sub> O                             | 450 mg                             | 500 mg/L                                      | M15A <sup>a</sup>   | 900 mL                      | NP <sup>d</sup>            |
| <sup>15</sup> NH <sub>4</sub> Cl                        | dd H <sub>2</sub> O                             | 450 mg                             | 500 mg/L                                      | M15 <sup>c</sup>    | 900 mL                      | NP <sup>d</sup>            |

<sup>a</sup> Medium M15A: glucose 30 g/L, beef extract 1 g/L, peptone 1 g/L, NaCl 5 g/L, CaCO<sub>3</sub> 3 g/L, pH 7.2

<sup>b</sup> Medium M15B: glucose 12 g/L, beef extract 5 g/L, peptone 1 g/L, NaCl 5 g/L, CaCO<sub>3</sub> 3 g/L, pH 7.2

<sup>c</sup> Medium M15: glucose 30 g/L, beef extract 5 g/L, peptone 1 g/L, NaCl 5 g/L, CaCO<sub>3</sub> 3 g/L, pH 7.2

<sup>d</sup>NP: Not to be purified.

**Table S7.** Energies and populations of predominant conformers of (10*S*, 11*R*, 12*S*, 15*R*)-**1** at M06-2X/6-31G(d,p) theory level in gas.

| Conformers | Structures                                                                          | E (Hartree)  | E (kcal/mol) | Population (%) |
|------------|-------------------------------------------------------------------------------------|--------------|--------------|----------------|
| a          | 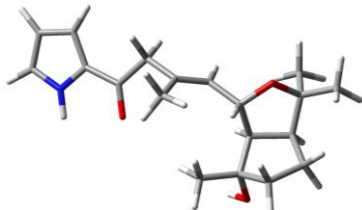 | -1020.543899 | -640400.9603 | 48.51          |
| b          |  | -1020.540591 | -640398.8846 | 1.46           |
| c          |  | -1020.543929 | -640400.9787 | 50.03          |

**Table S8.** Energies and populations of predominant conformers of (1*S*, 12*S*, 15*R*)-**3** at B3LYP/6-31G(d,p) theory level in gas.

| Conformers | Structures                                                                          | E (Hartree)  | E (kcal/mol) | Population (%) |
|------------|-------------------------------------------------------------------------------------|--------------|--------------|----------------|
| a          | 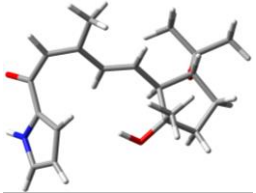   | -1020.725693 | -640515.0377 | 23.61          |
| b          |    | -1020.725332 | -640514.8109 | 16.10          |
| c          |    | -1020.723932 | -640513.9327 | 3.66           |
| d          |   | -1020.724043 | -640514.0023 | 4.11           |
| e          |  | -1020.725491 | -640514.9108 | 19.06          |
| f          |  | -1020.725034 | -640514.624  | 11.75          |
| g          |  | -1020.72386  | -640513.8873 | 3.39           |
| h          |  | -1020.725453 | -640514.8873 | 18.32          |



**Table S9.** Energies and populations of predominant conformers of (11*S*, 12*S*, 15*S*)-**4** at CAM-B3LYP/def2-TZVP theory level in gas.

| Conformers | Structures                                                                          | E (Hartree)  | E (kcal/mol) | Population (%) |
|------------|-------------------------------------------------------------------------------------|--------------|--------------|----------------|
| a          | 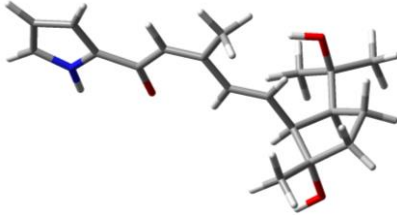   | -1020.55242  | -640406.3074 | 95.59          |
| b          |    | -1020.548958 | -640404.1345 | 2.44           |
| c          |   | -1020.548691 | -640403.967  | 1.84           |
| d          |  | -1020.546184 | -640402.3942 | 0.13           |

**Table S10.** Energies and populations of predominant conformers of (11*S*, 12*S*)-**5** at CAM-B3LYP/def2-TZVP theory level in gas.

| Conformers | Structures                                                                          | E (Hartree)  | E (kcal/mol) | Population (%) |
|------------|-------------------------------------------------------------------------------------|--------------|--------------|----------------|
| a          | 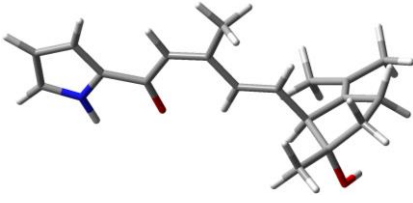 | -944.0982086 | -592430.5656 | 93.36          |
| b          |  | -944.0957124 | -592428.9992 | 6.64           |

**Table S11.** DFT Coordinates of the optimized conformers of (10*S*, 11*R*, 12*S*, 15*R*)-**1** at M06-2X/6-31G(d,p) theory level.

| Conformer (10 <i>S</i> , 11 <i>R</i> , 12 <i>S</i> , 15 <i>R</i> )- <b>1</b> -a |        |        |                         |           |           |
|---------------------------------------------------------------------------------|--------|--------|-------------------------|-----------|-----------|
| Center                                                                          | Atomic | Atomic | Coordinates (Angstroms) |           |           |
| Number                                                                          | Number | Type   | X                       | Y         | Z         |
| 1                                                                               | 6      | 0      | 6.606840                | -0.871758 | -0.468339 |
| 2                                                                               | 6      | 0      | 5.323483                | -1.253528 | -0.021958 |
| 3                                                                               | 6      | 0      | 4.489767                | -0.156911 | -0.176800 |
| 4                                                                               | 7      | 0      | 5.242940                | 0.860647  | -0.702283 |
| 5                                                                               | 6      | 0      | 6.520066                | 0.446116  | -0.882735 |
| 6                                                                               | 6      | 0      | 3.072688                | 0.084960  | 0.092269  |
| 7                                                                               | 6      | 0      | 2.256251                | -1.083900 | 0.630918  |
| 8                                                                               | 8      | 0      | 2.584705                | 1.181785  | -0.131486 |
| 9                                                                               | 6      | 0      | 0.894967                | -0.652220 | 1.110620  |
| 10                                                                              | 6      | 0      | 0.914330                | 0.169598  | 2.372040  |
| 11                                                                              | 6      | 0      | -0.189781               | -0.968926 | 0.399300  |
| 12                                                                              | 6      | 0      | -1.598712               | -0.506578 | 0.623146  |
| 13                                                                              | 6      | 0      | -2.078853               | 0.408263  | -0.533105 |
| 14                                                                              | 6      | 0      | -3.504627               | -0.095355 | -0.831988 |
| 15                                                                              | 6      | 0      | -3.434465               | -1.574046 | -0.402874 |
| 16                                                                              | 8      | 0      | -2.508120               | -1.602316 | 0.687949  |
| 17                                                                              | 6      | 0      | -2.242525               | 1.886779  | -0.158073 |
| 18                                                                              | 6      | 0      | -3.529235               | 1.877240  | 0.669101  |
| 19                                                                              | 6      | 0      | -4.443031               | 0.869390  | -0.052356 |
| 20                                                                              | 6      | 0      | -4.734559               | -2.183834 | 0.103082  |
| 21                                                                              | 6      | 0      | -2.879493               | -2.422775 | -1.552954 |
| 22                                                                              | 8      | 0      | -2.567671               | 2.615847  | -1.342763 |
| 23                                                                              | 6      | 0      | -1.036269               | 2.514958  | 0.528274  |
| 24                                                                              | 1      | 0      | 7.497976                | -1.481827 | -0.486599 |
| 25                                                                              | 1      | 0      | 5.032440                | -2.218850 | 0.368866  |
| 26                                                                              | 1      | 0      | 4.846587                | 1.769375  | -0.900601 |
| 27                                                                              | 1      | 0      | 7.272969                | 1.106888  | -1.286374 |
| 28                                                                              | 1      | 0      | 2.831135                | -1.560203 | 1.436842  |
| 29                                                                              | 1      | 0      | 2.175755                | -1.823609 | -0.176021 |
| 30                                                                              | 1      | 0      | -0.076108               | 0.302372  | 2.810650  |
| 31                                                                              | 1      | 0      | 1.341121                | 1.158786  | 2.170573  |
| 32                                                                              | 1      | 0      | 1.549382                | -0.314193 | 3.123632  |
| 33                                                                              | 1      | 0      | -0.063200               | -1.582619 | -0.494820 |
| 34                                                                              | 1      | 0      | -1.673326               | 0.021948  | 1.580296  |
| 35                                                                              | 1      | 0      | -1.400518               | 0.308580  | -1.390408 |
| 36                                                                              | 1      | 0      | -3.727841               | -0.035344 | -1.900915 |
| 37                                                                              | 1      | 0      | -3.305639               | 1.543833  | 1.688598  |
| 38                                                                              | 1      | 0      | -3.957151               | 2.881724  | 0.730146  |
| 39                                                                              | 1      | 0      | -5.100476               | 0.349862  | 0.648318  |
| 40                                                                              | 1      | 0      | -5.082743               | 1.396035  | -0.764269 |
| 41                                                                              | 1      | 0      | -5.049679               | -1.707610 | 1.033559  |
| 42                                                                              | 1      | 0      | -5.529322               | -2.074648 | -0.642045 |
| 43                                                                              | 1      | 0      | -4.590509               | -3.249895 | 0.303156  |
| 44                                                                              | 1      | 0      | -3.621412               | -2.533506 | -2.350992 |
| 45                                                                              | 1      | 0      | -1.981801               | -1.967948 | -1.986175 |
| 46                                                                              | 1      | 0      | -2.614451               | -3.416047 | -1.179130 |
| 47                                                                              | 1      | 0      | -1.793528               | 2.581611  | -1.924472 |
| 48                                                                              | 1      | 0      | -0.115072               | 2.335339  | -0.040674 |

| 49                                        | 1                | 0              | -1.193557               | 3.593751  | 0.619672  |
|-------------------------------------------|------------------|----------------|-------------------------|-----------|-----------|
| 50                                        | 1                | 0              | -0.883958               | 2.104294  | 1.530158  |
| <b>Conformer (10S, 11R, 12S, 15R)-1-b</b> |                  |                |                         |           |           |
| Center<br>Number                          | Atomic<br>Number | Atomic<br>Type | Coordinates (Angstroms) |           |           |
|                                           |                  |                | X                       | Y         | Z         |
| 1                                         | 6                | 0              | 4.488302                | 1.125670  | -2.043699 |
| 2                                         | 6                | 0              | 3.562738                | 1.063472  | -0.979671 |
| 3                                         | 6                | 0              | 4.081288                | 0.191392  | -0.034106 |
| 4                                         | 7                | 0              | 5.283814                | -0.264244 | -0.510762 |
| 5                                         | 6                | 0              | 5.543284                | 0.289891  | -1.719045 |
| 6                                         | 6                | 0              | 3.629180                | -0.288567 | 1.272097  |
| 7                                         | 6                | 0              | 2.297582                | 0.218648  | 1.802557  |
| 8                                         | 8                | 0              | 4.310242                | -1.084922 | 1.898772  |
| 9                                         | 6                | 0              | 1.125246                | -0.248865 | 0.965031  |
| 10                                        | 6                | 0              | 1.076971                | -1.732936 | 0.713117  |
| 11                                        | 6                | 0              | 0.224923                | 0.624430  | 0.506139  |
| 12                                        | 6                | 0              | -0.985394               | 0.291436  | -0.342553 |
| 13                                        | 6                | 0              | -2.054731               | -0.589254 | 0.344388  |
| 14                                        | 6                | 0              | -3.214320               | 0.391898  | 0.687756  |
| 15                                        | 6                | 0              | -2.710237               | 1.772203  | 0.200578  |
| 16                                        | 8                | 0              | -1.675773               | 1.469467  | -0.744100 |
| 17                                        | 6                | 0              | -2.693700               | -1.711947 | -0.513161 |
| 18                                        | 6                | 0              | -4.154740               | -1.697597 | -0.037047 |
| 19                                        | 6                | 0              | -4.478652               | -0.206653 | 0.035759  |
| 20                                        | 6                | 0              | -3.730160               | 2.623769  | -0.542957 |
| 21                                        | 6                | 0              | -2.149452               | 2.565572  | 1.386702  |
| 22                                        | 8                | 0              | -2.028407               | -2.926576 | -0.188752 |
| 23                                        | 6                | 0              | -2.609799               | -1.459705 | -2.020865 |
| 24                                        | 1                | 0              | 4.401130                | 1.708043  | -2.949335 |
| 25                                        | 1                | 0              | 2.615071                | 1.578040  | -0.905823 |
| 26                                        | 1                | 0              | 5.851758                | -0.913859 | 0.016015  |
| 27                                        | 1                | 0              | 6.447382                | 0.056877  | -2.261984 |
| 28                                        | 1                | 0              | 2.214513                | -0.172113 | 2.823105  |
| 29                                        | 1                | 0              | 2.317496                | 1.313601  | 1.846308  |
| 30                                        | 1                | 0              | 1.947072                | -2.037118 | 0.116908  |
| 31                                        | 1                | 0              | 0.174907                | -2.058167 | 0.190398  |
| 32                                        | 1                | 0              | 1.139529                | -2.284810 | 1.658911  |
| 33                                        | 1                | 0              | 0.369921                | 1.687080  | 0.695662  |
| 34                                        | 1                | 0              | -0.630246               | -0.172337 | -1.268987 |
| 35                                        | 1                | 0              | -1.650356               | -1.066555 | 1.241350  |
| 36                                        | 1                | 0              | -3.370209               | 0.426138  | 1.770952  |
| 37                                        | 1                | 0              | -4.188572               | -2.148257 | 0.962345  |
| 38                                        | 1                | 0              | -4.822546               | -2.266932 | -0.693941 |
| 39                                        | 1                | 0              | -4.631475               | 0.185579  | -0.974373 |
| 40                                        | 1                | 0              | -5.384371               | 0.014093  | 0.607461  |
| 41                                        | 1                | 0              | -4.019516               | 2.152418  | -1.484870 |
| 42                                        | 1                | 0              | -4.625513               | 2.778760  | 0.067653  |
| 43                                        | 1                | 0              | -3.295838               | 3.600657  | -0.775442 |
| 44                                        | 1                | 0              | -2.970012               | 2.922878  | 2.018353  |
| 45                                        | 1                | 0              | -1.583640               | 3.430163  | 1.026115  |
| 46                                        | 1                | 0              | -1.492207               | 1.949318  | 2.007739  |
| 47                                        | 1                | 0              | -2.383965               | -3.622387 | -0.761193 |
| 48                                        | 1                | 0              | -1.598778               | -1.668166 | -2.381203 |
| 49                                        | 1                | 0              | -3.303182               | -2.120533 | -2.554867 |

| 50                                 | 1             | 0           | -2.853527               | -0.423595 | -2.275401 |
|------------------------------------|---------------|-------------|-------------------------|-----------|-----------|
| Conformer (10S, 11R, 12S, 15R)-1-c |               |             |                         |           |           |
| Center Number                      | Atomic Number | Atomic Type | Coordinates (Angstroms) |           |           |
|                                    |               |             | X                       | Y         | Z         |
| 1                                  | 6             | 0           | -6.616097               | 0.904552  | -0.489955 |
| 2                                  | 6             | 0           | -5.325613               | 1.272205  | -0.051606 |
| 3                                  | 6             | 0           | -4.515896               | 0.153445  | -0.169575 |
| 4                                  | 7             | 0           | -5.289684               | -0.863453 | -0.664821 |
| 5                                  | 6             | 0           | -6.557036               | -0.427092 | -0.862852 |
| 6                                  | 6             | 0           | -3.105316               | -0.112482 | 0.114054  |
| 7                                  | 6             | 0           | -2.263795               | 1.056719  | 0.610704  |
| 8                                  | 8             | 0           | -2.644360               | -1.228533 | -0.065090 |
| 9                                  | 6             | 0           | -0.900366               | 0.623406  | 1.083149  |
| 10                                 | 6             | 0           | -0.911691               | -0.187490 | 2.352111  |
| 11                                 | 6             | 0           | 0.181597                | 0.937634  | 0.366201  |
| 12                                 | 6             | 0           | 1.593561                | 0.489930  | 0.600222  |
| 13                                 | 6             | 0           | 2.104167                | -0.403757 | -0.557887 |
| 14                                 | 6             | 0           | 3.531300                | 0.116784  | -0.819785 |
| 15                                 | 6             | 0           | 3.434885                | 1.590653  | -0.379928 |
| 16                                 | 8             | 0           | 2.486409                | 1.598114  | 0.691953  |
| 17                                 | 6             | 0           | 2.273738                | -1.877147 | -0.189592 |
| 18                                 | 6             | 0           | 3.541914                | -1.857268 | 0.676367  |
| 19                                 | 6             | 0           | 4.463231                | -0.843320 | -0.026412 |
| 20                                 | 6             | 0           | 4.716747                | 2.212268  | 0.157188  |
| 21                                 | 6             | 0           | 2.891412                | 2.440703  | -1.534313 |
| 22                                 | 8             | 0           | 2.561134                | -2.511410 | -1.437149 |
| 23                                 | 6             | 0           | 1.057466                | -2.524265 | 0.459929  |
| 24                                 | 1             | 0           | -7.493864               | 1.532766  | -0.529427 |
| 25                                 | 1             | 0           | -5.014345               | 2.242398  | 0.310469  |
| 26                                 | 1             | 0           | -4.911205               | -1.785254 | -0.836116 |
| 27                                 | 1             | 0           | -7.322672               | -1.083255 | -1.249660 |
| 28                                 | 1             | 0           | -2.820847               | 1.559445  | 1.413477  |
| 29                                 | 1             | 0           | -2.186747               | 1.776553  | -0.214197 |
| 30                                 | 1             | 0           | -1.546131               | 0.300117  | 3.101845  |
| 31                                 | 1             | 0           | 0.080910                | -0.311567 | 2.788526  |
| 32                                 | 1             | 0           | -1.335124               | -1.179858 | 2.160939  |
| 33                                 | 1             | 0           | 0.051744                | 1.542911  | -0.532960 |
| 34                                 | 1             | 0           | 1.661412                | -0.046831 | 1.553250  |
| 35                                 | 1             | 0           | 1.448262                | -0.319871 | -1.430455 |
| 36                                 | 1             | 0           | 3.777052                | 0.066466  | -1.883906 |
| 37                                 | 1             | 0           | 3.295433                | -1.525827 | 1.691764  |
| 38                                 | 1             | 0           | 3.985935                | -2.855971 | 0.762656  |
| 39                                 | 1             | 0           | 5.107505                | -0.323701 | 0.686245  |
| 40                                 | 1             | 0           | 5.117242                | -1.363515 | -0.730379 |
| 41                                 | 1             | 0           | 4.554583                | 3.274211  | 0.365030  |
| 42                                 | 1             | 0           | 5.527137                | 2.121368  | -0.573487 |
| 43                                 | 1             | 0           | 5.020230                | 1.731037  | 1.089095  |
| 44                                 | 1             | 0           | 2.007219                | 1.977562  | -1.985739 |
| 45                                 | 1             | 0           | 2.608423                | 3.428440  | -1.158936 |
| 46                                 | 1             | 0           | 3.645773                | 2.564707  | -2.318572 |
| 47                                 | 1             | 0           | 2.728157                | -3.447734 | -1.253819 |
| 48                                 | 1             | 0           | 0.873689                | -2.122148 | 1.460070  |
| 49                                 | 1             | 0           | 0.159026                | -2.362174 | -0.144159 |
| 50                                 | 1             | 0           | 1.218284                | -3.604337 | 0.566358  |

**Table S12.** DFT Coordinates of the optimized conformers of (11S, 12S, 15R)-**3** at B3LYP/6-31G(d,p) theory level.

| Conformer (11S, 12S, 15R)- <b>3-a</b> |               |             |                         |           |           |
|---------------------------------------|---------------|-------------|-------------------------|-----------|-----------|
| Center Number                         | Atomic Number | Atomic Type | Coordinates (Angstroms) |           |           |
|                                       |               |             | X                       | Y         | Z         |
| 1                                     | 6             | 0           | -3.629674               | -0.104428 | -0.373959 |
| 2                                     | 6             | 0           | -3.241972               | -1.074944 | 0.550792  |
| 3                                     | 6             | 0           | -3.632281               | -2.332501 | 0.038199  |
| 4                                     | 6             | 0           | -4.254133               | -2.102777 | -1.182938 |
| 5                                     | 7             | 0           | -4.249393               | -0.763267 | -1.412068 |
| 6                                     | 6             | 0           | -3.584778               | 1.357453  | -0.406809 |
| 7                                     | 8             | 0           | -4.224069               | 1.967431  | -1.270052 |
| 8                                     | 6             | 0           | -2.838803               | 2.103600  | 0.643744  |
| 9                                     | 6             | 0           | -1.548653               | 1.950190  | 1.028813  |
| 10                                    | 6             | 0           | -0.634885               | 1.002997  | 0.380670  |
| 11                                    | 6             | 0           | -0.994470               | 2.834891  | 2.122267  |
| 12                                    | 6             | 0           | 0.616779                | 0.713533  | 0.787337  |
| 13                                    | 6             | 0           | 1.504601                | -0.291302 | 0.114262  |
| 14                                    | 6             | 0           | 3.034935                | -0.040273 | 0.225135  |
| 15                                    | 6             | 0           | 3.682088                | -1.466581 | 0.208806  |
| 16                                    | 6             | 0           | 2.522888                | -2.467346 | 0.060978  |
| 17                                    | 6             | 0           | 1.296902                | -1.756576 | 0.645914  |
| 18                                    | 8             | 0           | 0.128046                | -2.351571 | 0.096097  |
| 19                                    | 6             | 0           | 1.257273                | -1.848260 | 2.177885  |
| 20                                    | 6             | 0           | 3.614598                | 0.901355  | -0.862547 |
| 21                                    | 6             | 0           | 5.119023                | 1.134283  | -0.635499 |
| 22                                    | 6             | 0           | 2.893176                | 2.257731  | -0.906547 |
| 23                                    | 8             | 0           | 3.414884                | 0.212771  | -2.109177 |
| 24                                    | 1             | 0           | 1.243245                | -0.351806 | -0.948208 |
| 25                                    | 1             | 0           | -2.761886               | -0.875895 | 1.498066  |
| 26                                    | 1             | 0           | -3.483525               | -3.298693 | 0.498466  |
| 27                                    | 1             | 0           | -4.687295               | -2.795263 | -1.889619 |
| 28                                    | 1             | 0           | -4.650265               | -0.257373 | -2.189336 |
| 29                                    | 1             | 0           | -3.415363               | 2.923090  | 1.067390  |
| 30                                    | 1             | 0           | -1.000319               | 0.520110  | -0.521741 |
| 31                                    | 1             | 0           | -1.749992               | 3.533598  | 2.487509  |
| 32                                    | 1             | 0           | -0.650806               | 2.236087  | 2.974176  |
| 33                                    | 1             | 0           | -0.131659               | 3.409969  | 1.768153  |
| 34                                    | 1             | 0           | 1.005778                | 1.179841  | 1.692106  |
| 35                                    | 1             | 0           | 3.244422                | 0.441003  | 1.189813  |
| 36                                    | 1             | 0           | 4.238140                | -1.641899 | 1.135802  |
| 37                                    | 1             | 0           | 4.387605                | -1.573543 | -0.616541 |
| 38                                    | 1             | 0           | 2.316201                | -2.659874 | -0.996500 |
| 39                                    | 1             | 0           | 2.716089                | -3.430704 | 0.543676  |
| 40                                    | 1             | 0           | -0.643810               | -1.847512 | 0.393830  |
| 41                                    | 1             | 0           | 0.400096                | -1.300597 | 2.584126  |
| 42                                    | 1             | 0           | 1.163012                | -2.896612 | 2.475580  |
| 43                                    | 1             | 0           | 2.162489                | -1.439896 | 2.640215  |
| 44                                    | 1             | 0           | 5.527793                | 1.770944  | -1.429348 |
| 45                                    | 1             | 0           | 5.674435                | 0.193838  | -0.641005 |
| 46                                    | 1             | 0           | 5.302798                | 1.639801  | 0.318591  |
| 47                                    | 1             | 0           | 3.349059                | 2.901390  | -1.669279 |
| 48                                    | 1             | 0           | 1.836198                | 2.137577  | -1.149493 |
| 49                                    | 1             | 0           | 2.969762                | 2.783468  | 0.051180  |
| 50                                    | 1             | 0           | 3.736983                | 0.786506  | -2.817087 |

Conformer (11S, 12S, 15R)-**3-b**

| Center                               | Atomic | Atomic | Coordinates (Angstroms) |           |           |
|--------------------------------------|--------|--------|-------------------------|-----------|-----------|
| Number                               | Number | Type   | X                       | Y         | Z         |
| 1                                    | 6      | 0      | 3.579920                | 0.249300  | -0.429173 |
| 2                                    | 6      | 0      | 2.917542                | 1.312110  | 0.189068  |
| 3                                    | 6      | 0      | 3.327517                | 2.500168  | -0.455876 |
| 4                                    | 6      | 0      | 4.235684                | 2.143418  | -1.445307 |
| 5                                    | 7      | 0      | 4.375440                | 0.793538  | -1.416936 |
| 6                                    | 6      | 0      | 3.691766                | -1.197631 | -0.225231 |
| 7                                    | 8      | 0      | 4.535939                | -1.821711 | -0.883220 |
| 8                                    | 6      | 0      | 2.911618                | -1.939265 | 0.800027  |
| 9                                    | 6      | 0      | 1.599248                | -1.881891 | 1.138110  |
| 10                                   | 6      | 0      | 0.641324                | -0.987214 | 0.489903  |
| 11                                   | 6      | 0      | 1.081580                | -2.813587 | 2.210661  |
| 12                                   | 6      | 0      | -0.632550               | -0.783176 | 0.873305  |
| 13                                   | 6      | 0      | -1.529979               | 0.235988  | 0.241470  |
| 14                                   | 6      | 0      | -3.034270               | -0.138718 | 0.109822  |
| 15                                   | 6      | 0      | -3.808397               | 1.219179  | 0.240568  |
| 16                                   | 6      | 0      | -2.736759               | 2.314264  | 0.363665  |
| 17                                   | 6      | 0      | -1.524009               | 1.613116  | 1.000899  |
| 18                                   | 8      | 0      | -0.299549               | 2.318526  | 0.823004  |
| 19                                   | 6      | 0      | -1.678530               | 1.476566  | 2.516819  |
| 20                                   | 6      | 0      | -3.391301               | -0.911196 | -1.186523 |
| 21                                   | 6      | 0      | -4.882185               | -1.292356 | -1.201311 |
| 22                                   | 6      | 0      | -2.544417               | -2.180561 | -1.367589 |
| 23                                   | 8      | 0      | -3.115110               | 0.005683  | -2.261824 |
| 24                                   | 1      | 0      | -1.157711               | 0.461939  | -0.767132 |
| 25                                   | 1      | 0      | 2.205054                | 1.242446  | 0.996870  |
| 26                                   | 1      | 0      | 3.007302                | 3.505753  | -0.222477 |
| 27                                   | 1      | 0      | 4.779756                | 2.752624  | -2.152412 |
| 28                                   | 1      | 0      | 4.985845                | 0.206391  | -1.968107 |
| 29                                   | 1      | 0      | 3.519356                | -2.716359 | 1.258394  |
| 30                                   | 1      | 0      | 1.006909                | -0.434157 | -0.369635 |
| 31                                   | 1      | 0      | 1.873244                | -3.464383 | 2.587200  |
| 32                                   | 1      | 0      | 0.678448                | -2.247289 | 3.058673  |
| 33                                   | 1      | 0      | 0.268099                | -3.442023 | 1.830722  |
| 34                                   | 1      | 0      | -1.032756               | -1.315755 | 1.734958  |
| 35                                   | 1      | 0      | -3.308379               | -0.795247 | 0.945645  |
| 36                                   | 1      | 0      | -4.454025               | 1.204889  | 1.124638  |
| 37                                   | 1      | 0      | -4.448023               | 1.399317  | -0.624607 |
| 38                                   | 1      | 0      | -2.448918               | 2.665126  | -0.635592 |
| 39                                   | 1      | 0      | -3.063141               | 3.186659  | 0.938395  |
| 40                                   | 1      | 0      | -0.132215               | 2.396448  | -0.126709 |
| 41                                   | 1      | 0      | -0.822977               | 0.947233  | 2.943177  |
| 42                                   | 1      | 0      | -1.719963               | 2.472368  | 2.967424  |
| 43                                   | 1      | 0      | -2.592769               | 0.938834  | 2.784544  |
| 44                                   | 1      | 0      | -5.134241               | -1.798477 | -2.140821 |
| 45                                   | 1      | 0      | -5.523383               | -0.412754 | -1.112221 |
| 46                                   | 1      | 0      | -5.122242               | -1.979834 | -0.383234 |
| 47                                   | 1      | 0      | -2.846632               | -2.705186 | -2.282643 |
| 48                                   | 1      | 0      | -1.482159               | -1.944641 | -1.444399 |
| 49                                   | 1      | 0      | -2.680547               | -2.876015 | -0.532758 |
| 50                                   | 1      | 0      | -3.295046               | -0.453739 | -3.092879 |
| <b>Conformer (11S, 12S, 15R)-3-c</b> |        |        |                         |           |           |
| Center                               | Atomic | Atomic | Coordinates (Angstroms) |           |           |
| Number                               | Number | Type   | X                       | Y         | Z         |
| 1                                    | 6      | 0      | -3.550694               | 0.568604  | -0.243609 |
| 2                                    | 6      | 0      | -2.820676               | 1.595421  | 0.354280  |

|                                      |        |        |                         |           |           |
|--------------------------------------|--------|--------|-------------------------|-----------|-----------|
| 3                                    | 6      | 0      | -3.086627               | 2.781358  | -0.365095 |
| 4                                    | 6      | 0      | -3.976229               | 2.456052  | -1.381517 |
| 5                                    | 7      | 0      | -4.246186               | 1.127449  | -1.293719 |
| 6                                    | 6      | 0      | -3.788426               | -0.843372 | 0.056123  |
| 7                                    | 8      | 0      | -4.677700               | -1.447022 | -0.555540 |
| 8                                    | 6      | 0      | -3.051198               | -1.535356 | 1.147654  |
| 9                                    | 6      | 0      | -1.717315               | -1.613725 | 1.378586  |
| 10                                   | 6      | 0      | -0.715288               | -0.996225 | 0.506251  |
| 11                                   | 6      | 0      | -1.229106               | -2.437520 | 2.549331  |
| 12                                   | 6      | 0      | 0.614789                | -1.021728 | 0.708232  |
| 13                                   | 6      | 0      | 1.626387                | -0.448588 | -0.241881 |
| 14                                   | 6      | 0      | 2.861683                | 0.226008  | 0.429887  |
| 15                                   | 6      | 0      | 4.071066                | -0.077570 | -0.517568 |
| 16                                   | 6      | 0      | 3.471111                | -0.763585 | -1.753679 |
| 17                                   | 6      | 0      | 2.221737                | -1.497154 | -1.235533 |
| 18                                   | 8      | 0      | 1.238085                | -1.701301 | -2.250298 |
| 19                                   | 6      | 0      | 2.570777                | -2.839587 | -0.579627 |
| 20                                   | 6      | 0      | 2.684463                | 1.740952  | 0.711333  |
| 21                                   | 6      | 0      | 3.900098                | 2.298492  | 1.473449  |
| 22                                   | 6      | 0      | 1.405380                | 2.045187  | 1.507143  |
| 23                                   | 8      | 0      | 2.601009                | 2.361865  | -0.583400 |
| 24                                   | 1      | 0      | 1.138568                | 0.287686  | -0.890150 |
| 25                                   | 1      | 0      | -2.182757               | 1.486512  | 1.218779  |
| 26                                   | 1      | 0      | -2.683726               | 3.765119  | -0.170578 |
| 27                                   | 1      | 0      | -4.422843               | 3.073588  | -2.147074 |
| 28                                   | 1      | 0      | -4.879989               | 0.573253  | -1.852071 |
| 29                                   | 1      | 0      | -3.714626               | -2.140463 | 1.762106  |
| 30                                   | 1      | 0      | -1.085269               | -0.499798 | -0.385500 |
| 31                                   | 1      | 0      | -2.063778               | -2.864860 | 3.108896  |
| 32                                   | 1      | 0      | -0.582190               | -3.256846 | 2.215772  |
| 33                                   | 1      | 0      | -0.637627               | -1.825038 | 3.240048  |
| 34                                   | 1      | 0      | 1.014369                | -1.515296 | 1.593677  |
| 35                                   | 1      | 0      | 3.037378                | -0.247279 | 1.404739  |
| 36                                   | 1      | 0      | 4.790795                | -0.733615 | -0.016419 |
| 37                                   | 1      | 0      | 4.603597                | 0.832658  | -0.797567 |
| 38                                   | 1      | 0      | 3.136271                | -0.012095 | -2.475836 |
| 39                                   | 1      | 0      | 4.175743                | -1.432293 | -2.262356 |
| 40                                   | 1      | 0      | 1.554000                | -2.406867 | -2.830573 |
| 41                                   | 1      | 0      | 1.667450                | -3.328598 | -0.206255 |
| 42                                   | 1      | 0      | 3.042543                | -3.505067 | -1.313470 |
| 43                                   | 1      | 0      | 3.273557                | -2.724950 | 0.252291  |
| 44                                   | 1      | 0      | 3.790353                | 3.379469  | 1.621545  |
| 45                                   | 1      | 0      | 4.829558                | 2.128655  | 0.925189  |
| 46                                   | 1      | 0      | 3.993195                | 1.838783  | 2.463225  |
| 47                                   | 1      | 0      | 1.342979                | 3.120415  | 1.717655  |
| 48                                   | 1      | 0      | 0.513623                | 1.754219  | 0.949753  |
| 49                                   | 1      | 0      | 1.396546                | 1.522425  | 2.469089  |
| 50                                   | 1      | 0      | 2.432843                | 3.303807  | -0.447546 |
| <b>Conformer (11S, 12S, 15R)-3-d</b> |        |        |                         |           |           |
| Center                               | Atomic | Atomic | Coordinates (Angstroms) |           |           |
| Number                               | Number | Type   | X                       | Y         | Z         |
| 1                                    | 6      | 0      | 3.628803                | 0.248448  | -0.423554 |
| 2                                    | 6      | 0      | 2.930459                | 1.346031  | 0.085430  |
| 3                                    | 6      | 0      | 3.390229                | 2.494053  | -0.595685 |
| 4                                    | 6      | 0      | 4.362168                | 2.081197  | -1.497978 |
| 5                                    | 7      | 0      | 4.492989                | 0.735306  | -1.383817 |
| 6                                    | 6      | 0      | 3.723189                | -1.185800 | -0.141316 |

| 7                             | 8      | 0      | 4.596915                | -1.842544 | -0.726741 |
|-------------------------------|--------|--------|-------------------------|-----------|-----------|
| 8                             | 6      | 0      | 2.901567                | -1.886583 | 0.879896  |
| 9                             | 6      | 0      | 1.583938                | -1.811914 | 1.193878  |
| 10                            | 6      | 0      | 0.637188                | -0.921879 | 0.522174  |
| 11                            | 6      | 0      | 1.047256                | -2.726374 | 2.273155  |
| 12                            | 6      | 0      | -0.641941               | -0.723953 | 0.890806  |
| 13                            | 6      | 0      | -1.559316               | 0.267706  | 0.238525  |
| 14                            | 6      | 0      | -3.043190               | -0.181219 | 0.074834  |
| 15                            | 6      | 0      | -3.889880               | 1.129512  | 0.212968  |
| 16                            | 6      | 0      | -2.875020               | 2.274932  | 0.359768  |
| 17                            | 6      | 0      | -1.637158               | 1.627095  | 1.003528  |
| 18                            | 8      | 0      | -0.427055               | 2.334574  | 0.719112  |
| 19                            | 6      | 0      | -1.794573               | 1.474340  | 2.522229  |
| 20                            | 6      | 0      | -3.338290               | -0.952720 | -1.237666 |
| 21                            | 6      | 0      | -4.802294               | -1.427413 | -1.270670 |
| 22                            | 6      | 0      | -2.410826               | -2.162263 | -1.431066 |
| 23                            | 8      | 0      | -3.114229               | -0.003624 | -2.295273 |
| 24                            | 1      | 0      | -1.166575               | 0.530033  | -0.750148 |
| 25                            | 1      | 0      | 2.158561                | 1.323570  | 0.839473  |
| 26                            | 1      | 0      | 3.049456                | 3.509622  | -0.453820 |
| 27                            | 1      | 0      | 4.954189                | 2.648469  | -2.201450 |
| 28                            | 1      | 0      | 5.132494                | 0.115310  | -1.860867 |
| 29                            | 1      | 0      | 3.490077                | -2.661228 | 1.366642  |
| 30                            | 1      | 0      | 1.010922                | -0.371320 | -0.335172 |
| 31                            | 1      | 0      | 1.831405                | -3.373412 | 2.671228  |
| 32                            | 1      | 0      | 0.632054                | -2.147527 | 3.106773  |
| 33                            | 1      | 0      | 0.238447                | -3.359045 | 1.890211  |
| 34                            | 1      | 0      | -1.044480               | -1.259092 | 1.750162  |
| 35                            | 1      | 0      | -3.296859               | -0.864596 | 0.895851  |
| 36                            | 1      | 0      | -4.544488               | 1.069920  | 1.088826  |
| 37                            | 1      | 0      | -4.527164               | 1.288421  | -0.658068 |
| 38                            | 1      | 0      | -2.578656               | 2.646449  | -0.626530 |
| 39                            | 1      | 0      | -3.259922               | 3.122257  | 0.939488  |
| 40                            | 1      | 0      | -0.449181               | 3.164020  | 1.215256  |
| 41                            | 1      | 0      | -0.911426               | 0.998042  | 2.955286  |
| 42                            | 1      | 0      | -1.913601               | 2.460721  | 2.987693  |
| 43                            | 1      | 0      | -2.675851               | 0.882267  | 2.789488  |
| 44                            | 1      | 0      | -5.014186               | -1.934288 | -2.219605 |
| 45                            | 1      | 0      | -5.498069               | -0.590692 | -1.175437 |
| 46                            | 1      | 0      | -5.005744               | -2.140464 | -0.464522 |
| 47                            | 1      | 0      | -2.679069               | -2.696465 | -2.351283 |
| 48                            | 1      | 0      | -1.366797               | -1.855722 | -1.506410 |
| 49                            | 1      | 0      | -2.499111               | -2.873495 | -0.603174 |
| 50                            | 1      | 0      | -3.236256               | -0.465318 | -3.135486 |
| Conformer (11S, 12S, 15R)-3-e |        |        |                         |           |           |
| Center                        | Atomic | Atomic | Coordinates (Angstroms) |           |           |
| Number                        | Number | Type   | X                       | Y         | Z         |
| 1                             | 6      | 0      | -3.614745               | -0.120902 | -0.373832 |
| 2                             | 6      | 0      | -3.214114               | -1.080372 | 0.556968  |
| 3                             | 6      | 0      | -3.584683               | -2.346659 | 0.050345  |
| 4                             | 6      | 0      | -4.207364               | -2.132824 | -1.173287 |
| 5                             | 7      | 0      | -4.222573               | -0.794594 | -1.409141 |
| 6                             | 6      | 0      | -3.592810               | 1.341922  | -0.414996 |
| 7                             | 8      | 0      | -4.245712               | 1.935939  | -1.278876 |
| 8                             | 6      | 0      | -2.853429               | 2.106149  | 0.626759  |
| 9                             | 6      | 0      | -1.561577               | 1.969199  | 1.012371  |
| 10                            | 6      | 0      | -0.639355               | 1.023870  | 0.373334  |



| 11                            | 6      | 0      | -1.015069               | 2.869674  | 2.096674  |
|-------------------------------|--------|--------|-------------------------|-----------|-----------|
| 12                            | 6      | 0      | 0.609645                | 0.739765  | 0.790586  |
| 13                            | 6      | 0      | 1.504432                | -0.266467 | 0.127995  |
| 14                            | 6      | 0      | 3.032942                | -0.009336 | 0.252479  |
| 15                            | 6      | 0      | 3.676413                | -1.436886 | 0.312700  |
| 16                            | 6      | 0      | 2.530723                | -2.439953 | 0.103500  |
| 17                            | 6      | 0      | 1.283784                | -1.733929 | 0.649173  |
| 18                            | 8      | 0      | 0.139314                | -2.334855 | 0.057436  |
| 19                            | 6      | 0      | 1.193341                | -1.831783 | 2.178472  |
| 20                            | 6      | 0      | 3.614841                | 0.890207  | -0.880254 |
| 21                            | 6      | 0      | 5.118985                | 1.135838  | -0.669048 |
| 22                            | 6      | 0      | 2.892387                | 2.238571  | -0.967631 |
| 23                            | 8      | 0      | 3.398916                | 0.277137  | -2.162178 |
| 24                            | 1      | 0      | 1.259387                | -0.322591 | -0.939126 |
| 25                            | 1      | 0      | -2.740343               | -0.868857 | 1.504712  |
| 26                            | 1      | 0      | -3.423629               | -3.308001 | 0.516659  |
| 27                            | 1      | 0      | -4.628682               | -2.835369 | -1.877169 |
| 28                            | 1      | 0      | -4.629064               | -0.298816 | -2.190101 |
| 29                            | 1      | 0      | -3.437509               | 2.924446  | 1.042291  |
| 30                            | 1      | 0      | -0.996350               | 0.537013  | -0.530236 |
| 31                            | 1      | 0      | -1.775880               | 3.567364  | 2.452681  |
| 32                            | 1      | 0      | -0.669274               | 2.282881  | 2.956103  |
| 33                            | 1      | 0      | -0.155429               | 3.446078  | 1.737289  |
| 34                            | 1      | 0      | 0.991604                | 1.211101  | 1.695621  |
| 35                            | 1      | 0      | 3.234599                | 0.509188  | 1.199384  |
| 36                            | 1      | 0      | 4.157201                | -1.591679 | 1.283907  |
| 37                            | 1      | 0      | 4.466579                | -1.580756 | -0.431729 |
| 38                            | 1      | 0      | 2.361596                | -2.620676 | -0.963446 |
| 39                            | 1      | 0      | 2.708276                | -3.409183 | 0.580077  |
| 40                            | 1      | 0      | -0.648273               | -1.843119 | 0.334447  |
| 41                            | 1      | 0      | 0.319273                | -1.290091 | 2.554909  |
| 42                            | 1      | 0      | 1.095351                | -2.881404 | 2.470538  |
| 43                            | 1      | 0      | 2.078341                | -1.417318 | 2.673363  |
| 44                            | 1      | 0      | 5.509700                | 1.750949  | -1.484764 |
| 45                            | 1      | 0      | 5.689434                | 0.201227  | -0.649928 |
| 46                            | 1      | 0      | 5.306599                | 1.656702  | 0.275786  |
| 47                            | 1      | 0      | 3.348930                | 2.849504  | -1.751666 |
| 48                            | 1      | 0      | 1.837256                | 2.106526  | -1.211951 |
| 49                            | 1      | 0      | 2.963430                | 2.781423  | -0.019858 |
| 50                            | 1      | 0      | 3.948651                | -0.516661 | -2.208700 |
| Conformer (11S, 12S, 15R)-3-f |        |        |                         |           |           |
| Center                        | Atomic | Atomic | Coordinates (Angstroms) |           |           |
| Number                        | Number | Type   | X                       | Y         | Z         |
| 1                             | 6      | 0      | 3.568826                | 0.261973  | -0.431287 |
| 2                             | 6      | 0      | 2.906177                | 1.315583  | 0.201940  |
| 3                             | 6      | 0      | 3.298069                | 2.510910  | -0.440894 |
| 4                             | 6      | 0      | 4.196059                | 2.167257  | -1.444234 |
| 5                             | 7      | 0      | 4.347307                | 0.818440  | -1.425518 |
| 6                             | 6      | 0      | 3.692579                | -1.185250 | -0.236647 |
| 7                             | 8      | 0      | 4.536456                | -1.799822 | -0.903311 |
| 8                             | 6      | 0      | 2.922385                | -1.937357 | 0.788831  |
| 9                             | 6      | 0      | 1.610886                | -1.890531 | 1.131542  |
| 10                            | 6      | 0      | 0.645586                | -0.998317 | 0.490485  |
| 11                            | 6      | 0      | 1.102134                | -2.830871 | 2.200658  |
| 12                            | 6      | 0      | -0.627227               | -0.801118 | 0.880058  |
| 13                            | 6      | 0      | -1.530540               | 0.217160  | 0.254204  |
| 14                            | 6      | 0      | -3.032581               | -0.165227 | 0.120707  |

| 15                                   | 6      | 0      | -3.811404               | 1.184940  | 0.300333  |
|--------------------------------------|--------|--------|-------------------------|-----------|-----------|
| 16                                   | 6      | 0      | -2.746676               | 2.288876  | 0.391065  |
| 17                                   | 6      | 0      | -1.521257               | 1.594074  | 1.012668  |
| 18                                   | 8      | 0      | -0.305423               | 2.308660  | 0.818328  |
| 19                                   | 6      | 0      | -1.655963               | 1.460323  | 2.530939  |
| 20                                   | 6      | 0      | -3.378767               | -0.903070 | -1.207915 |
| 21                                   | 6      | 0      | -4.863757               | -1.301658 | -1.243716 |
| 22                                   | 6      | 0      | -2.518217               | -2.153537 | -1.415018 |
| 23                                   | 8      | 0      | -3.074278               | -0.058516 | -2.333049 |
| 24                                   | 1      | 0      | -1.165153               | 0.444195  | -0.757490 |
| 25                                   | 1      | 0      | 2.206168                | 1.234510  | 1.019415  |
| 26                                   | 1      | 0      | 2.973324                | 3.512512  | -0.196860 |
| 27                                   | 1      | 0      | 4.725621                | 2.784925  | -2.154977 |
| 28                                   | 1      | 0      | 4.954122                | 0.239794  | -1.989524 |
| 29                                   | 1      | 0      | 3.537128                | -2.712362 | 1.241359  |
| 30                                   | 1      | 0      | 1.004484                | -0.442218 | -0.369878 |
| 31                                   | 1      | 0      | 1.899008                | -3.478556 | 2.571494  |
| 32                                   | 1      | 0      | 0.697863                | -2.271768 | 3.052945  |
| 33                                   | 1      | 0      | 0.291743                | -3.462479 | 1.819458  |
| 34                                   | 1      | 0      | -1.022593               | -1.337923 | 1.741191  |
| 35                                   | 1      | 0      | -3.303227               | -0.844073 | 0.939904  |
| 36                                   | 1      | 0      | -4.413980               | 1.154593  | 1.213356  |
| 37                                   | 1      | 0      | -4.517892               | 1.380402  | -0.512874 |
| 38                                   | 1      | 0      | -2.473546               | 2.633732  | -0.614862 |
| 39                                   | 1      | 0      | -3.068145               | 3.164615  | 0.963111  |
| 40                                   | 1      | 0      | -0.119791               | 2.341196  | -0.130641 |
| 41                                   | 1      | 0      | -0.792933               | 0.933862  | 2.945104  |
| 42                                   | 1      | 0      | -1.693320               | 2.456705  | 2.980738  |
| 43                                   | 1      | 0      | -2.564113               | 0.919754  | 2.813247  |
| 44                                   | 1      | 0      | -5.092190               | -1.788126 | -2.196421 |
| 45                                   | 1      | 0      | -5.526305               | -0.435832 | -1.139550 |
| 46                                   | 1      | 0      | -5.104143               | -1.999518 | -0.434951 |
| 47                                   | 1      | 0      | -2.825330               | -2.661448 | -2.333720 |
| 48                                   | 1      | 0      | -1.461818               | -1.897483 | -1.505880 |
| 49                                   | 1      | 0      | -2.631183               | -2.849980 | -0.578394 |
| 50                                   | 1      | 0      | -3.736861               | 0.644346  | -2.364739 |
| <b>Conformer (11S, 12S, 15R)-3-g</b> |        |        |                         |           |           |
| Center                               | Atomic | Atomic | Coordinates (Angstroms) |           |           |
| Number                               | Number | Type   | X                       | Y         | Z         |
| 1                                    | 6      | 0      | 3.626243                | 0.260044  | -0.425006 |
| 2                                    | 6      | 0      | 2.925807                | 1.352664  | 0.091339  |
| 3                                    | 6      | 0      | 3.376523                | 2.505089  | -0.588379 |
| 4                                    | 6      | 0      | 4.345153                | 2.099481  | -1.497494 |
| 5                                    | 7      | 0      | 4.482947                | 0.753941  | -1.388130 |
| 6                                    | 6      | 0      | 3.728704                | -1.174548 | -0.147193 |
| 7                                    | 8      | 0      | 4.604627                | -1.824953 | -0.735870 |
| 8                                    | 6      | 0      | 2.911991                | -1.882825 | 0.872972  |
| 9                                    | 6      | 0      | 1.594311                | -1.817140 | 1.188394  |
| 10                                   | 6      | 0      | 0.641609                | -0.929021 | 0.522003  |
| 11                                   | 6      | 0      | 1.064026                | -2.740063 | 2.263634  |
| 12                                   | 6      | 0      | -0.638213               | -0.742426 | 0.893442  |
| 13                                   | 6      | 0      | -1.564091               | 0.247093  | 0.249489  |
| 14                                   | 6      | 0      | -3.043330               | -0.216279 | 0.083820  |
| 15                                   | 6      | 0      | -3.903092               | 1.076895  | 0.293406  |
| 16                                   | 6      | 0      | -2.903318               | 2.237881  | 0.404645  |
| 17                                   | 6      | 0      | -1.642788               | 1.604154  | 1.019345  |
| 18                                   | 8      | 0      | -0.451676               | 2.329971  | 0.707041  |

|    |   |   |           |           |           |
|----|---|---|-----------|-----------|-----------|
| 19 | 6 | 0 | -1.764242 | 1.448768  | 2.540891  |
| 20 | 6 | 0 | -3.329165 | -0.936644 | -1.268765 |
| 21 | 6 | 0 | -4.784620 | -1.431768 | -1.327050 |
| 22 | 6 | 0 | -2.385348 | -2.120748 | -1.500955 |
| 23 | 8 | 0 | -3.074636 | -0.046024 | -2.368483 |
| 24 | 1 | 0 | -1.178456 | 0.515164  | -0.740950 |
| 25 | 1 | 0 | 2.158820  | 1.323172  | 0.850013  |
| 26 | 1 | 0 | 3.032306  | 3.518784  | -0.441471 |
| 27 | 1 | 0 | 4.930137  | 2.671538  | -2.202931 |
| 28 | 1 | 0 | 5.121750  | 0.138249  | -1.871685 |
| 29 | 1 | 0 | 3.505172  | -2.656130 | 1.356215  |
| 30 | 1 | 0 | 1.010593  | -0.372068 | -0.333218 |
| 31 | 1 | 0 | 1.852688  | -3.383619 | 2.658353  |
| 32 | 1 | 0 | 0.645260  | -2.168184 | 3.100325  |
| 33 | 1 | 0 | 0.259597  | -3.376457 | 1.877738  |
| 34 | 1 | 0 | -1.036284 | -1.285875 | 1.749555  |
| 35 | 1 | 0 | -3.284539 | -0.934555 | 0.878493  |
| 36 | 1 | 0 | -4.500461 | 0.990198  | 1.206617  |
| 37 | 1 | 0 | -4.622747 | 1.248424  | -0.513815 |
| 38 | 1 | 0 | -2.632020 | 2.608698  | -0.589757 |
| 39 | 1 | 0 | -3.285080 | 3.083983  | 0.987765  |
| 40 | 1 | 0 | -0.455521 | 3.142599  | 1.230773  |
| 41 | 1 | 0 | -0.864484 | 0.984542  | 2.951918  |
| 42 | 1 | 0 | -1.887132 | 2.432724  | 3.010656  |
| 43 | 1 | 0 | -2.629113 | 0.842112  | 2.828185  |
| 44 | 1 | 0 | -4.972694 | -1.909615 | -2.292819 |
| 45 | 1 | 0 | -5.503304 | -0.613393 | -1.210414 |
| 46 | 1 | 0 | -4.985733 | -2.162482 | -0.536651 |
| 47 | 1 | 0 | -2.655527 | -2.627707 | -2.431764 |
| 48 | 1 | 0 | -1.349450 | -1.789635 | -1.583863 |
| 49 | 1 | 0 | -2.450694 | -2.841631 | -0.680209 |
| 50 | 1 | 0 | -3.767191 | 0.627984  | -2.372870 |

**Conformer (11S, 12S, 15R)-3-h**

| Center Number | Atomic Number | Atomic Type | Coordinates (Angstroms) |           |           |
|---------------|---------------|-------------|-------------------------|-----------|-----------|
|               |               |             | X                       | Y         | Z         |
| 1             | 6             | 0           | -3.634878               | -0.086475 | -0.352892 |
| 2             | 6             | 0           | -3.256151               | -1.029644 | 0.603633  |
| 3             | 6             | 0           | -3.661402               | -2.299322 | 0.134035  |
| 4             | 6             | 0           | -4.282756               | -2.103788 | -1.093373 |
| 5             | 7             | 0           | -4.263402               | -0.772943 | -1.367487 |
| 6             | 6             | 0           | -3.573152               | 1.372876  | -0.434366 |
| 7             | 8             | 0           | -4.203880               | 1.961850  | -1.317790 |
| 8             | 6             | 0           | -2.817434               | 2.142687  | 0.592554  |
| 9             | 6             | 0           | -1.526788               | 1.987940  | 0.974396  |
| 10            | 6             | 0           | -0.627150               | 1.016164  | 0.342643  |
| 11            | 6             | 0           | -0.956148               | 2.893702  | 2.041529  |
| 12            | 6             | 0           | 0.622382                | 0.719506  | 0.749716  |
| 13            | 6             | 0           | 1.498180                | -0.304547 | 0.088907  |
| 14            | 6             | 0           | 3.031255                | -0.094345 | 0.223989  |
| 15            | 6             | 0           | 3.642400                | -1.532000 | 0.146062  |
| 16            | 6             | 0           | 2.458039                | -2.508881 | 0.018697  |
| 17            | 6             | 0           | 1.247645                | -1.770386 | 0.603222  |
| 18            | 8             | 0           | 0.068103                | -2.325875 | 0.035970  |
| 19            | 6             | 0           | 1.195370                | -1.873988 | 2.133370  |
| 20            | 6             | 0           | 3.668209                | 0.885826  | -0.807822 |
| 21            | 6             | 0           | 5.166830                | 1.054109  | -0.527897 |
| 22            | 6             | 0           | 2.990667                | 2.264506  | -0.799975 |

|    |   |   |           |           |           |
|----|---|---|-----------|-----------|-----------|
| 23 | 8 | 0 | 3.599512  | 0.330339  | -2.131655 |
| 24 | 1 | 0 | 1.231003  | -0.364491 | -0.975567 |
| 25 | 1 | 0 | -2.773653 | -0.803986 | 1.543706  |
| 26 | 1 | 0 | -3.524431 | -3.251073 | 0.626922  |
| 27 | 1 | 0 | -4.725418 | -2.814729 | -1.775394 |
| 28 | 1 | 0 | -4.660956 | -0.289232 | -2.160506 |
| 29 | 1 | 0 | -3.385608 | 2.976956  | 0.998269  |
| 30 | 1 | 0 | -1.003626 | 0.519633  | -0.547890 |
| 31 | 1 | 0 | -1.701650 | 3.610048  | 2.392753  |
| 32 | 1 | 0 | -0.614785 | 2.313069  | 2.906853  |
| 33 | 1 | 0 | -0.088987 | 3.449578  | 1.668056  |
| 34 | 1 | 0 | 1.021794  | 1.194879  | 1.644625  |
| 35 | 1 | 0 | 3.227216  | 0.330321  | 1.218187  |
| 36 | 1 | 0 | 4.237497  | -1.744155 | 1.040005  |
| 37 | 1 | 0 | 4.305660  | -1.623893 | -0.715803 |
| 38 | 1 | 0 | 2.238435  | -2.713157 | -1.034534 |
| 39 | 1 | 0 | 2.632979  | -3.471601 | 0.509028  |
| 40 | 1 | 0 | -0.699086 | -1.839614 | 0.373122  |
| 41 | 1 | 0 | 0.355822  | -1.300404 | 2.540866  |
| 42 | 1 | 0 | 1.063415  | -2.921350 | 2.419760  |
| 43 | 1 | 0 | 2.112276  | -1.502727 | 2.603310  |
| 44 | 1 | 0 | 5.608337  | 1.722789  | -1.272081 |
| 45 | 1 | 0 | 5.691743  | 0.097695  | -0.583247 |
| 46 | 1 | 0 | 5.330407  | 1.482241  | 0.466040  |
| 47 | 1 | 0 | 3.488923  | 2.922559  | -1.518119 |
| 48 | 1 | 0 | 1.933316  | 2.197223  | -1.074117 |
| 49 | 1 | 0 | 3.044494  | 2.732163  | 0.188952  |
| 50 | 1 | 0 | 2.678113  | 0.367699  | -2.421557 |

**Table S13.** DFT Coordinates of the optimized conformers of (11S, 12S, 15S)-**4** at CAM-B3LYP/def2-TZVP theory level.

| Conformer (11S, 12S, 15S)- <b>4-a</b> |               |             |                         |           |           |
|---------------------------------------|---------------|-------------|-------------------------|-----------|-----------|
| Center Number                         | Atomic Number | Atomic Type | Coordinates (Angstroms) |           |           |
|                                       |               |             | X                       | Y         | Z         |
| 1                                     | 7             | 0           | -5.344521               | 0.165452  | -1.397021 |
| 2                                     | 6             | 0           | -4.649558               | 0.016348  | -0.212347 |
| 3                                     | 6             | 0           | -5.601013               | 0.000491  | 0.795908  |
| 4                                     | 6             | 0           | -6.879292               | 0.144946  | 0.200258  |
| 5                                     | 6             | 0           | -6.688457               | 0.244434  | -1.156951 |
| 6                                     | 6             | 0           | -3.198772               | -0.087906 | -0.210698 |
| 7                                     | 6             | 0           | -2.500298               | -0.240413 | 1.110041  |
| 8                                     | 8             | 0           | -2.575599               | -0.042721 | -1.267800 |
| 9                                     | 6             | 0           | -1.183154               | -0.385760 | 1.372003  |
| 10                                    | 6             | 0           | -0.748123               | -0.503280 | 2.817026  |
| 11                                    | 6             | 0           | -0.138133               | -0.438950 | 0.356125  |
| 12                                    | 6             | 0           | 1.184939                | -0.523222 | 0.576666  |
| 13                                    | 6             | 0           | 2.209389                | -0.539897 | -0.538578 |
| 14                                    | 6             | 0           | 3.086424                | -1.820508 | -0.533761 |
| 15                                    | 6             | 0           | 4.164395                | -1.529589 | 0.516462  |
| 16                                    | 6             | 0           | 4.324170                | -0.003249 | 0.545614  |
| 17                                    | 6             | 0           | 3.294719                | 0.571617  | -0.447510 |
| 18                                    | 6             | 0           | 2.852295                | 2.029378  | -0.151384 |
| 19                                    | 6             | 0           | 1.836197                | 2.531813  | -1.185887 |
| 20                                    | 6             | 0           | 4.065049                | 2.971522  | -0.156910 |
| 21                                    | 8             | 0           | 2.279214                | 2.143328  | 1.153237  |
| 22                                    | 8             | 0           | 3.738592                | -1.944260 | -1.807148 |
| 23                                    | 6             | 0           | 2.351104                | -3.131935 | -0.271908 |
| 24                                    | 1             | 0           | -4.896302               | 0.208743  | -2.305012 |
| 25                                    | 1             | 0           | -5.417621               | -0.102333 | 1.857181  |
| 26                                    | 1             | 0           | -7.834853               | 0.173026  | 0.708622  |
| 27                                    | 1             | 0           | -7.390777               | 0.364339  | -1.971321 |
| 28                                    | 1             | 0           | -3.177258               | -0.218846 | 1.957350  |
| 29                                    | 1             | 0           | -0.224628               | -1.450321 | 2.989068  |
| 30                                    | 1             | 0           | -1.595606               | -0.477294 | 3.511298  |
| 31                                    | 1             | 0           | -0.086139               | 0.325711  | 3.090712  |
| 32                                    | 1             | 0           | -0.456847               | -0.398511 | -0.682749 |
| 33                                    | 1             | 0           | 1.582328                | -0.567267 | 1.588284  |
| 34                                    | 1             | 0           | 1.704194                | -0.445826 | -1.509078 |
| 35                                    | 1             | 0           | 5.117818                | -2.012607 | 0.276164  |
| 36                                    | 1             | 0           | 3.855905                | -1.870853 | 1.511941  |
| 37                                    | 1             | 0           | 4.160766                | 0.363112  | 1.565080  |
| 38                                    | 1             | 0           | 5.341408                | 0.283633  | 0.255774  |
| 39                                    | 1             | 0           | 3.790397                | 0.598762  | -1.431030 |
| 40                                    | 1             | 0           | 2.255255                | 2.522669  | -2.197238 |
| 41                                    | 1             | 0           | 0.924064                | 1.927798  | -1.186253 |
| 42                                    | 1             | 0           | 1.518407                | 3.554610  | -0.951331 |
| 43                                    | 1             | 0           | 3.752502                | 4.007095  | 0.023049  |
| 44                                    | 1             | 0           | 4.765399                | 2.726328  | 0.649104  |
| 45                                    | 1             | 0           | 4.601581                | 2.935468  | -1.110504 |
| 46                                    | 1             | 0           | 1.338625                | 1.901768  | 1.090990  |
| 47                                    | 1             | 0           | 3.057086                | -2.156296 | -2.468535 |
| 48                                    | 1             | 0           | 1.920979                | -3.177508 | 0.733462  |
| 49                                    | 1             | 0           | 1.544941                | -3.275482 | -1.000119 |
| 50                                    | 1             | 0           | 3.031089                | -3.983898 | -0.387099 |

Conformer (11S, 12S, 15S)-**4-b**

| Center                        | Atomic | Atomic | Coordinates (Angstroms) |           |           |
|-------------------------------|--------|--------|-------------------------|-----------|-----------|
| Number                        | Number | Type   | X                       | Y         | Z         |
| 1                             | 7      | 0      | -5.433687               | 0.178901  | -1.381902 |
| 2                             | 6      | 0      | -4.706810               | 0.035764  | -0.216119 |
| 3                             | 6      | 0      | -5.631918               | 0.023009  | 0.817377  |
| 4                             | 6      | 0      | -6.926044               | 0.160798  | 0.256234  |
| 5                             | 6      | 0      | -6.771310               | 0.254977  | -1.105781 |
| 6                             | 6      | 0      | -3.255064               | -0.069075 | -0.247780 |
| 7                             | 6      | 0      | -2.533916               | -0.205171 | 1.060371  |
| 8                             | 8      | 0      | -2.651910               | -0.043944 | -1.316982 |
| 9                             | 6      | 0      | -1.214682               | -0.339222 | 1.312277  |
| 10                            | 6      | 0      | -0.779677               | -0.450062 | 2.759147  |
| 11                            | 6      | 0      | -0.166910               | -0.377260 | 0.295486  |
| 12                            | 6      | 0      | 1.148998                | -0.509601 | 0.538186  |
| 13                            | 6      | 0      | 2.217653                | -0.528698 | -0.531905 |
| 14                            | 6      | 0      | 3.049333                | -1.844329 | -0.508657 |
| 15                            | 6      | 0      | 4.102769                | -1.619151 | 0.592458  |
| 16                            | 6      | 0      | 4.214779                | -0.096265 | 0.776984  |
| 17                            | 6      | 0      | 3.346724                | 0.517571  | -0.333997 |
| 18                            | 6      | 0      | 3.003231                | 2.018866  | -0.172368 |
| 19                            | 6      | 0      | 2.335803                | 2.558293  | -1.444227 |
| 20                            | 6      | 0      | 2.156888                | 2.403682  | 1.042120  |
| 21                            | 8      | 0      | 4.244928                | 2.728985  | -0.013801 |
| 22                            | 8      | 0      | 3.749151                | -1.968893 | -1.758254 |
| 23                            | 6      | 0      | 2.259578                | -3.135131 | -0.309533 |
| 24                            | 1      | 0      | -5.010836               | 0.219305  | -2.302020 |
| 25                            | 1      | 0      | -5.421125               | -0.075297 | 1.874021  |
| 26                            | 1      | 0      | -7.867265               | 0.187582  | 0.790774  |
| 27                            | 1      | 0      | -7.496020               | 0.369162  | -1.901007 |
| 28                            | 1      | 0      | -3.200014               | -0.188192 | 1.916279  |
| 29                            | 1      | 0      | -0.281816               | -1.408926 | 2.941273  |
| 30                            | 1      | 0      | -1.623472               | -0.392418 | 3.455977  |
| 31                            | 1      | 0      | -0.096338               | 0.364768  | 3.022898  |
| 32                            | 1      | 0      | -0.474237               | -0.277829 | -0.742973 |
| 33                            | 1      | 0      | 1.507758                | -0.615053 | 1.559065  |
| 34                            | 1      | 0      | 1.768565                | -0.385186 | -1.522793 |
| 35                            | 1      | 0      | 5.075540                | -2.040526 | 0.315116  |
| 36                            | 1      | 0      | 3.799560                | -2.070561 | 1.544275  |
| 37                            | 1      | 0      | 3.854211                | 0.174834  | 1.774604  |
| 38                            | 1      | 0      | 5.256157                | 0.234882  | 0.706668  |
| 39                            | 1      | 0      | 3.977883                | 0.470538  | -1.237108 |
| 40                            | 1      | 0      | 1.353995                | 2.106005  | -1.613871 |
| 41                            | 1      | 0      | 2.961062                | 2.368948  | -2.324665 |
| 42                            | 1      | 0      | 2.211480                | 3.645923  | -1.387861 |
| 43                            | 1      | 0      | 1.109160                | 2.116437  | 0.931581  |
| 44                            | 1      | 0      | 2.547771                | 1.970464  | 1.967134  |
| 45                            | 1      | 0      | 2.174799                | 3.490692  | 1.190627  |
| 46                            | 1      | 0      | 4.802010                | 2.537211  | -0.787918 |
| 47                            | 1      | 0      | 3.088414                | -2.146618 | -2.450317 |
| 48                            | 1      | 0      | 1.768528                | -3.180035 | 0.667173  |
| 49                            | 1      | 0      | 2.920093                | -4.005811 | -0.395177 |
| 50                            | 1      | 0      | 1.496045                | -3.245753 | -1.087790 |
| Conformer (11S, 12S, 15S)-4-c |        |        |                         |           |           |
| Center                        | Atomic | Atomic | Coordinates (Angstroms) |           |           |
| Number                        | Number | Type   | X                       | Y         | Z         |
| 1                             | 7      | 0      | -5.400573               | -0.064358 | -1.408822 |
| 2                             | 6      | 0      | -4.688628               | 0.007770  | -0.227078 |

| 3                                    | 6      | 0      | -5.624286               | 0.204621  | 0.777215  |
|--------------------------------------|--------|--------|-------------------------|-----------|-----------|
| 4                                    | 6      | 0      | -6.910473               | 0.247194  | 0.182559  |
| 5                                    | 6      | 0      | -6.740030               | 0.077077  | -1.170224 |
| 6                                    | 6      | 0      | -3.238845               | -0.118549 | -0.221881 |
| 7                                    | 6      | 0      | -2.527392               | -0.043583 | 1.098276  |
| 8                                    | 8      | 0      | -2.627143               | -0.283229 | -1.273555 |
| 9                                    | 6      | 0      | -1.207853               | -0.131673 | 1.372932  |
| 10                                   | 6      | 0      | -0.772484               | -0.019535 | 2.818269  |
| 11                                   | 6      | 0      | -0.160916               | -0.323258 | 0.374517  |
| 12                                   | 6      | 0      | 1.159033                | -0.419313 | 0.614732  |
| 13                                   | 6      | 0      | 2.186509                | -0.604865 | -0.478214 |
| 14                                   | 6      | 0      | 3.017996                | -1.908819 | -0.316924 |
| 15                                   | 6      | 0      | 4.096796                | -1.518092 | 0.695237  |
| 16                                   | 6      | 0      | 4.437230                | -0.058573 | 0.377432  |
| 17                                   | 6      | 0      | 3.307963                | 0.474236  | -0.528609 |
| 18                                   | 6      | 0      | 2.954014                | 1.975996  | -0.354557 |
| 19                                   | 6      | 0      | 4.166278                | 2.837816  | -0.746899 |
| 20                                   | 6      | 0      | 2.494393                | 2.409560  | 1.043810  |
| 21                                   | 8      | 0      | 1.915003                | 2.310362  | -1.282782 |
| 22                                   | 8      | 0      | 3.674986                | -2.215399 | -1.554470 |
| 23                                   | 6      | 0      | 2.242747                | -3.152276 | 0.105931  |
| 24                                   | 1      | 0      | -4.967013               | -0.203986 | -2.314282 |
| 25                                   | 1      | 0      | -5.425773               | 0.309723  | 1.835465  |
| 26                                   | 1      | 0      | -7.857274               | 0.387208  | 0.688736  |
| 27                                   | 1      | 0      | -7.454083               | 0.045452  | -1.982609 |
| 28                                   | 1      | 0      | -3.200299               | 0.101979  | 1.936546  |
| 29                                   | 1      | 0      | -1.618492               | 0.125878  | 3.499448  |
| 30                                   | 1      | 0      | -0.257708               | -0.931326 | 3.140166  |
| 31                                   | 1      | 0      | -0.103227               | 0.836722  | 2.956623  |
| 32                                   | 1      | 0      | -0.477240               | -0.392489 | -0.664022 |
| 33                                   | 1      | 0      | 1.544217                | -0.372323 | 1.629891  |
| 34                                   | 1      | 0      | 1.682763                | -0.612835 | -1.454649 |
| 35                                   | 1      | 0      | 4.990254                | -2.147429 | 0.624604  |
| 36                                   | 1      | 0      | 3.717097                | -1.582411 | 1.721987  |
| 37                                   | 1      | 0      | 4.559645                | 0.505120  | 1.305410  |
| 38                                   | 1      | 0      | 5.393524                | -0.002087 | -0.157084 |
| 39                                   | 1      | 0      | 3.693271                | 0.397725  | -1.559714 |
| 40                                   | 1      | 0      | 3.907592                | 3.903401  | -0.737328 |
| 41                                   | 1      | 0      | 4.490960                | 2.615941  | -1.769964 |
| 42                                   | 1      | 0      | 5.013363                | 2.684743  | -0.070918 |
| 43                                   | 1      | 0      | 3.171871                | 2.077626  | 1.834241  |
| 44                                   | 1      | 0      | 1.484361                | 2.065523  | 1.275506  |
| 45                                   | 1      | 0      | 2.433204                | 3.503351  | 1.103303  |
| 46                                   | 1      | 0      | 1.094388                | 1.880081  | -0.984389 |
| 47                                   | 1      | 0      | 2.986953                | -2.398203 | -2.218066 |
| 48                                   | 1      | 0      | 1.771375                | -3.040642 | 1.087162  |
| 49                                   | 1      | 0      | 2.909011                | -4.021752 | 0.151461  |
| 50                                   | 1      | 0      | 1.466197                | -3.392752 | -0.628471 |
| <b>Conformer (11S, 12S, 15S)-4-d</b> |        |        |                         |           |           |
| Center                               | Atomic | Atomic | Coordinates (Angstroms) |           |           |
| Number                               | Number | Type   | X                       | Y         | Z         |
| 1                                    | 7      | 0      | -5.494402               | -0.319635 | -1.394579 |
| 2                                    | 6      | 0      | -4.775859               | -0.009759 | -0.256064 |
| 3                                    | 6      | 0      | -5.705413               | 0.389987  | 0.691985  |
| 4                                    | 6      | 0      | -6.994625               | 0.314314  | 0.107398  |
| 5                                    | 6      | 0      | -6.832097               | -0.128483 | -1.183261 |
| 6                                    | 6      | 0      | -3.326550               | -0.136489 | -0.234102 |

|    |   |   |           |           |           |
|----|---|---|-----------|-----------|-----------|
| 7  | 6 | 0 | -2.606415 | 0.205688  | 1.037983  |
| 8  | 8 | 0 | -2.724130 | -0.508788 | -1.237073 |
| 9  | 6 | 0 | -1.286685 | 0.155218  | 1.320081  |
| 10 | 6 | 0 | -0.833173 | 0.586822  | 2.698171  |
| 11 | 6 | 0 | -0.253760 | -0.286568 | 0.389083  |
| 12 | 6 | 0 | 1.073686  | -0.250399 | 0.602927  |
| 13 | 6 | 0 | 2.098510  | -0.684230 | -0.415897 |
| 14 | 6 | 0 | 2.958139  | -1.900186 | 0.035908  |
| 15 | 6 | 0 | 4.155162  | -1.826203 | -0.908152 |
| 16 | 6 | 0 | 4.476895  | -0.343457 | -0.954137 |
| 17 | 6 | 0 | 3.106692  | 0.377087  | -0.978612 |
| 18 | 6 | 0 | 3.169080  | 1.809827  | -0.377366 |
| 19 | 6 | 0 | 1.846272  | 2.578988  | -0.514824 |
| 20 | 6 | 0 | 4.267480  | 2.636893  | -1.072665 |
| 21 | 8 | 0 | 3.505428  | 1.725575  | 1.009638  |
| 22 | 8 | 0 | 2.262171  | -3.124152 | -0.203461 |
| 23 | 6 | 0 | 3.396116  | -1.892731 | 1.503807  |
| 24 | 1 | 0 | -5.065080 | -0.643408 | -2.253745 |
| 25 | 1 | 0 | -5.500176 | 0.707164  | 1.705712  |
| 26 | 1 | 0 | -7.938374 | 0.556672  | 0.579337  |
| 27 | 1 | 0 | -7.550439 | -0.323905 | -1.968428 |
| 28 | 1 | 0 | -3.268848 | 0.552633  | 1.823521  |
| 29 | 1 | 0 | -0.182416 | 1.466009  | 2.633929  |
| 30 | 1 | 0 | -1.672826 | 0.858318  | 3.347784  |
| 31 | 1 | 0 | -0.291985 | -0.222657 | 3.200524  |
| 32 | 1 | 0 | -0.585986 | -0.663298 | -0.575539 |
| 33 | 1 | 0 | 1.476648  | 0.130086  | 1.538060  |
| 34 | 1 | 0 | 1.531406  | -1.029771 | -1.295878 |
| 35 | 1 | 0 | 5.006718  | -2.424256 | -0.567203 |
| 36 | 1 | 0 | 3.886918  | -2.193447 | -1.906966 |
| 37 | 1 | 0 | 5.059702  | -0.065539 | -0.068629 |
| 38 | 1 | 0 | 5.079167  | -0.097177 | -1.834929 |
| 39 | 1 | 0 | 2.843605  | 0.501275  | -2.040835 |
| 40 | 1 | 0 | 1.404090  | 2.450014  | -1.507620 |
| 41 | 1 | 0 | 1.116433  | 2.293733  | 0.245428  |
| 42 | 1 | 0 | 2.001802  | 3.653166  | -0.356171 |
| 43 | 1 | 0 | 4.304872  | 3.655931  | -0.669234 |
| 44 | 1 | 0 | 4.094839  | 2.702534  | -2.152064 |
| 45 | 1 | 0 | 5.263715  | 2.217334  | -0.899059 |
| 46 | 1 | 0 | 3.571478  | 2.633057  | 1.354760  |
| 47 | 1 | 0 | 1.407332  | -3.059651 | 0.258936  |
| 48 | 1 | 0 | 2.541310  | -2.045905 | 2.172149  |
| 49 | 1 | 0 | 4.080585  | -2.726012 | 1.701888  |
| 50 | 1 | 0 | 3.897849  | -0.964444 | 1.789916  |



**Table S14.** DFT Coordinates of the optimized conformers of (11S, 12S)-5 at CAM-B3LYP/def2-TZVP theory level.

| Conformer (11S, 12S)-5-a |               |             |                         |           |           |
|--------------------------|---------------|-------------|-------------------------|-----------|-----------|
| Center Number            | Atomic Number | Atomic Type | Coordinates (Angstroms) |           |           |
|                          |               |             | X                       | Y         | Z         |
| 1                        | 7             | 0           | -5.132756               | 0.550009  | -1.302236 |
| 2                        | 6             | 0           | -4.525131               | 0.097581  | -0.155144 |
| 3                        | 6             | 0           | -5.541406               | -0.170801 | 0.767527  |
| 4                        | 6             | 0           | -6.773581               | 0.133336  | 0.141532  |
| 5                        | 6             | 0           | -6.481043               | 0.578749  | -1.145008 |
| 6                        | 6             | 0           | -3.056065               | 0.003228  | -0.153256 |
| 7                        | 6             | 0           | -2.429778               | -0.484077 | 1.090493  |
| 8                        | 8             | 0           | -2.447276               | 0.334182  | -1.175775 |
| 9                        | 6             | 0           | -1.101284               | -0.668117 | 1.349834  |
| 10                       | 6             | 0           | -0.691327               | -1.172145 | 2.713111  |
| 11                       | 6             | 0           | -0.057857               | -0.397970 | 0.361527  |
| 12                       | 6             | 0           | 1.268228                | -0.538723 | 0.575754  |
| 13                       | 6             | 0           | 2.324018                | -0.229629 | -0.449920 |
| 14                       | 6             | 0           | 3.225385                | -1.448198 | -0.844882 |
| 15                       | 6             | 0           | 4.246429                | -1.499556 | 0.309813  |
| 16                       | 6             | 0           | 4.565558                | -0.022133 | 0.615282  |
| 17                       | 6             | 0           | 3.354651                | 0.765732  | 0.104627  |
| 18                       | 6             | 0           | 3.224216                | 2.107741  | 0.126602  |
| 19                       | 6             | 0           | 2.009637                | 2.836256  | -0.392871 |
| 20                       | 6             | 0           | 4.292261                | 3.013057  | 0.691184  |
| 21                       | 6             | 0           | 2.487810                | -2.753977 | -1.094650 |
| 22                       | 8             | 0           | 3.887245                | -1.135150 | -2.069891 |
| 23                       | 1             | 0           | -4.583731               | 0.807822  | -2.116056 |
| 24                       | 1             | 0           | -5.407047               | -0.544951 | 1.779945  |
| 25                       | 1             | 0           | -7.768515               | 0.040909  | 0.572849  |
| 26                       | 1             | 0           | -7.142030               | 0.908731  | -1.944090 |
| 27                       | 1             | 0           | -3.129756               | -0.719643 | 1.895346  |
| 28                       | 1             | 0           | -1.563419               | -1.340711 | 3.359789  |
| 29                       | 1             | 0           | -0.133903               | -2.120428 | 2.635295  |
| 30                       | 1             | 0           | -0.024913               | -0.453052 | 3.218011  |
| 31                       | 1             | 0           | -0.413708               | -0.052536 | -0.610709 |
| 32                       | 1             | 0           | 1.633220                | -0.871714 | 1.553914  |
| 33                       | 1             | 0           | 1.833892                | 0.136536  | -1.363834 |
| 34                       | 1             | 0           | 5.130603                | -2.087995 | 0.022703  |
| 35                       | 1             | 0           | 3.792271                | -1.989086 | 1.187120  |
| 36                       | 1             | 0           | 5.487051                | 0.296470  | 0.097564  |
| 37                       | 1             | 0           | 4.751309                | 0.146706  | 1.688670  |
| 38                       | 1             | 0           | 1.235283                | 2.170552  | -0.792756 |
| 39                       | 1             | 0           | 2.294498                | 3.551311  | -1.185627 |
| 40                       | 1             | 0           | 1.547267                | 3.437649  | 0.410331  |
| 41                       | 1             | 0           | 4.595857                | 3.770899  | -0.052973 |
| 42                       | 1             | 0           | 3.904905                | 3.575938  | 1.559898  |
| 43                       | 1             | 0           | 5.193724                | 2.476571  | 1.015419  |
| 44                       | 1             | 0           | 1.967654                | -3.105320 | -0.191996 |
| 45                       | 1             | 0           | 1.745494                | -2.626123 | -1.897191 |
| 46                       | 1             | 0           | 3.204542                | -3.526455 | -1.413736 |
| 47                       | 1             | 0           | 4.214677                | -0.226519 | -2.016239 |
| Conformer (11S, 12S)-5-b |               |             |                         |           |           |
| Center Number            | Atomic Number | Atomic Type | Coordinates (Angstroms) |           |           |
|                          |               |             | X                       | Y         | Z         |
| 1                        | 7             | 0           | -4.740428               | -1.239106 | -0.324879 |

|    |   |   |           |           |           |
|----|---|---|-----------|-----------|-----------|
| 2  | 6 | 0 | -4.238505 | 0.015701  | -0.068725 |
| 3  | 6 | 0 | -5.334043 | 0.865197  | 0.119525  |
| 4  | 6 | 0 | -6.504479 | 0.085859  | -0.029863 |
| 5  | 6 | 0 | -6.097130 | -1.217458 | -0.306067 |
| 6  | 6 | 0 | -2.782352 | 0.188740  | -0.058279 |
| 7  | 6 | 0 | -2.263668 | 1.529531  | 0.255102  |
| 8  | 8 | 0 | -2.071407 | -0.801667 | -0.289755 |
| 9  | 6 | 0 | -0.957235 | 1.910936  | 0.172266  |
| 10 | 6 | 0 | -0.526992 | 3.267925  | 0.664695  |
| 11 | 6 | 0 | 0.062142  | 1.026229  | -0.400251 |
| 12 | 6 | 0 | 1.313483  | 0.849172  | 0.067796  |
| 13 | 6 | 0 | 2.173702  | -0.277248 | -0.419055 |
| 14 | 6 | 0 | 1.705840  | -1.665352 | 0.193836  |
| 15 | 6 | 0 | 2.931048  | -2.541741 | -0.101634 |
| 16 | 6 | 0 | 4.141464  | -1.642867 | 0.186393  |
| 17 | 6 | 0 | 3.678653  | -0.229393 | -0.171555 |
| 18 | 6 | 0 | 4.494202  | 0.836860  | -0.302383 |
| 19 | 6 | 0 | 4.043503  | 2.198895  | -0.773826 |
| 20 | 6 | 0 | 5.976572  | 0.755077  | -0.021896 |
| 21 | 6 | 0 | 1.422006  | -1.588053 | 1.701063  |
| 22 | 8 | 0 | 0.587813  | -2.182033 | -0.486152 |
| 23 | 1 | 0 | -4.124481 | -2.026240 | -0.501254 |
| 24 | 1 | 0 | -5.288665 | 1.929980  | 0.337167  |
| 25 | 1 | 0 | -7.534552 | 0.427091  | 0.052331  |
| 26 | 1 | 0 | -6.684382 | -2.115648 | -0.486894 |
| 27 | 1 | 0 | -2.991419 | 2.252512  | 0.630896  |
| 28 | 1 | 0 | -1.364081 | 3.833278  | 1.098256  |
| 29 | 1 | 0 | 0.256294  | 3.171281  | 1.435501  |
| 30 | 1 | 0 | -0.083741 | 3.858736  | -0.154215 |
| 31 | 1 | 0 | -0.270430 | 0.378186  | -1.214884 |
| 32 | 1 | 0 | 1.667086  | 1.414900  | 0.937205  |
| 33 | 1 | 0 | 1.990967  | -0.414199 | -1.500713 |
| 34 | 1 | 0 | 2.889692  | -2.813112 | -1.168909 |
| 35 | 1 | 0 | 2.925771  | -3.477391 | 0.478470  |
| 36 | 1 | 0 | 5.030341  | -1.950403 | -0.385836 |
| 37 | 1 | 0 | 4.425550  | -1.703917 | 1.252872  |
| 38 | 1 | 0 | 2.992640  | 2.227055  | -1.088944 |
| 39 | 1 | 0 | 4.659182  | 2.523935  | -1.631994 |
| 40 | 1 | 0 | 4.186452  | 2.964446  | 0.010952  |
| 41 | 1 | 0 | 6.563008  | 0.909957  | -0.946435 |
| 42 | 1 | 0 | 6.286371  | -0.202677 | 0.416359  |
| 43 | 1 | 0 | 6.284211  | 1.556898  | 0.673160  |
| 44 | 1 | 0 | 2.269091  | -1.169330 | 2.267432  |
| 45 | 1 | 0 | 1.212811  | -2.599505 | 2.082483  |
| 46 | 1 | 0 | 0.539675  | -0.961532 | 1.901580  |
| 47 | 1 | 0 | -0.214915 | -1.679018 | -0.256030 |

**Table S15.** MIC values ( $\mu\text{g/mL}$ ) of the active compounds in the antibacterial bioassay.

| Compounds               | <i>Xanthomonas oryzae</i> RS105 | methicillin-resistant <i>Staphylococcus aureus</i> (shhs A1) | <i>Staphylococcus aureus</i> (ATCC 6538) | <i>Bacillus subtilis</i> (ATCC 6633) |
|-------------------------|---------------------------------|--------------------------------------------------------------|------------------------------------------|--------------------------------------|
| <b>2</b>                | 3.125                           | 6.250                                                        | 3.125                                    | 12.50                                |
| <b>3</b>                | 6.250                           | 12.50                                                        | 6.250                                    | 12.50                                |
| <b>4</b>                | 6.250                           | 6.250                                                        | 3.125                                    | 6.250                                |
| Acetone <sup>a</sup>    | >50                             | >50                                                          | >50                                      | >50                                  |
| Kanamycin <sup>b</sup>  | 0.3906                          | –                                                            | 12.50                                    | 6.250                                |
| Vancomycin <sup>b</sup> | –                               | 1.5625                                                       | –                                        | –                                    |

<sup>a</sup> Negative control; <sup>b</sup> positive controls

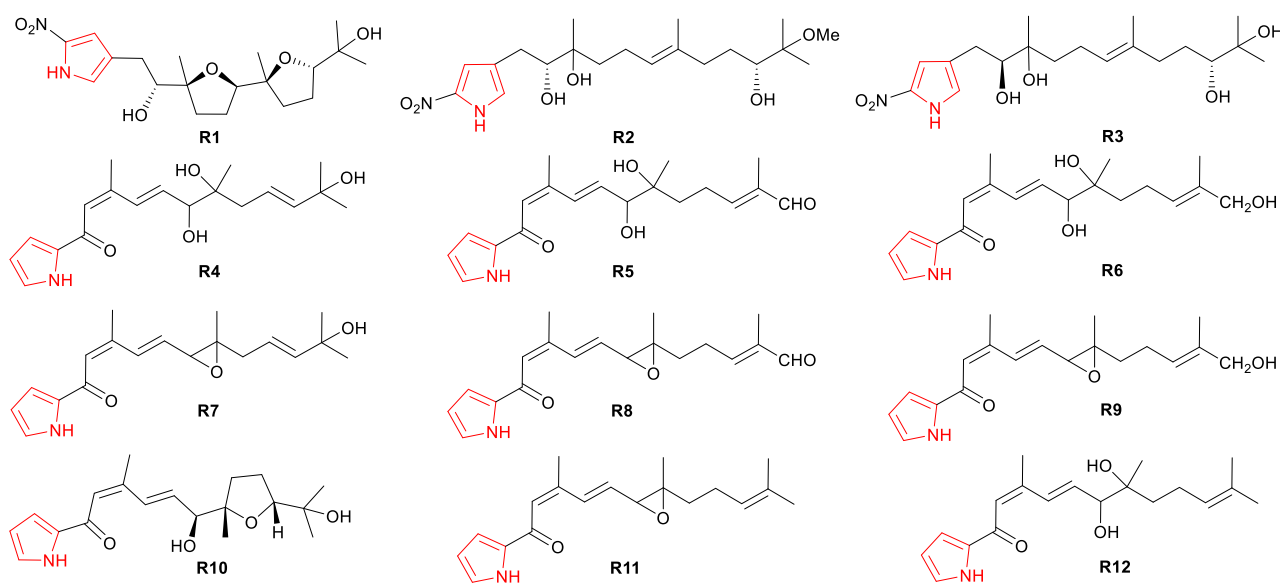**Figure S1.** Chemical structures of previously reported pyrrolosequiterpenes.

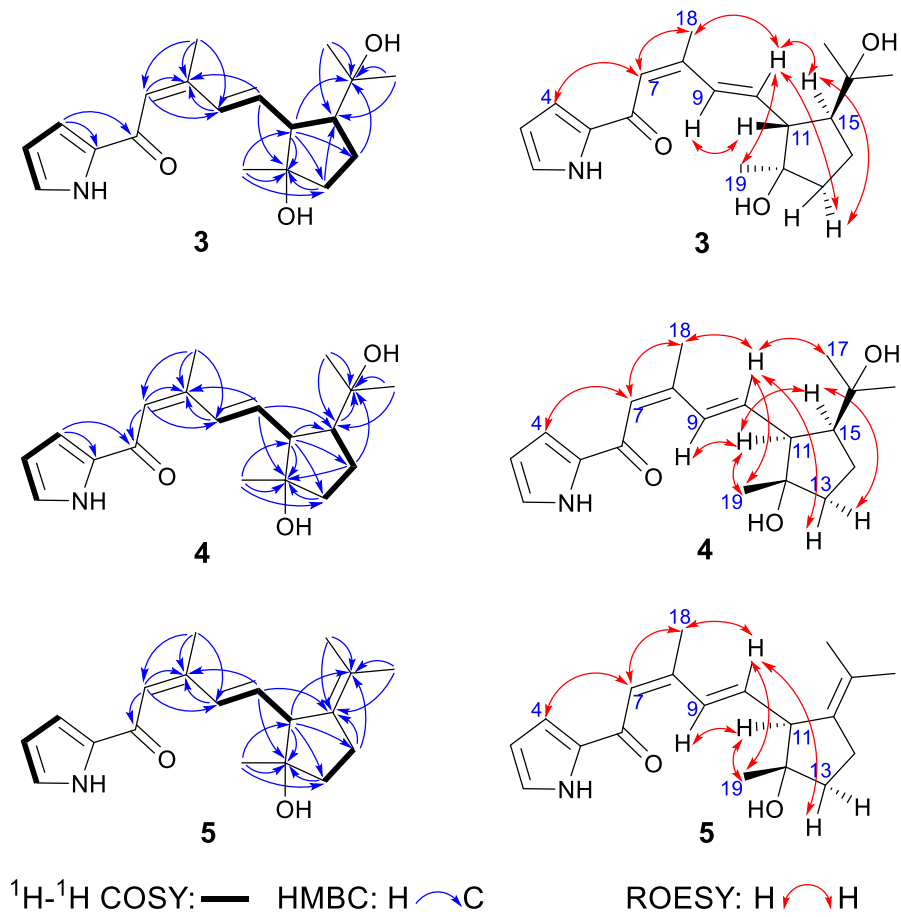

**Figure S2.** Key 2D NMR correlations of compounds 3–5.

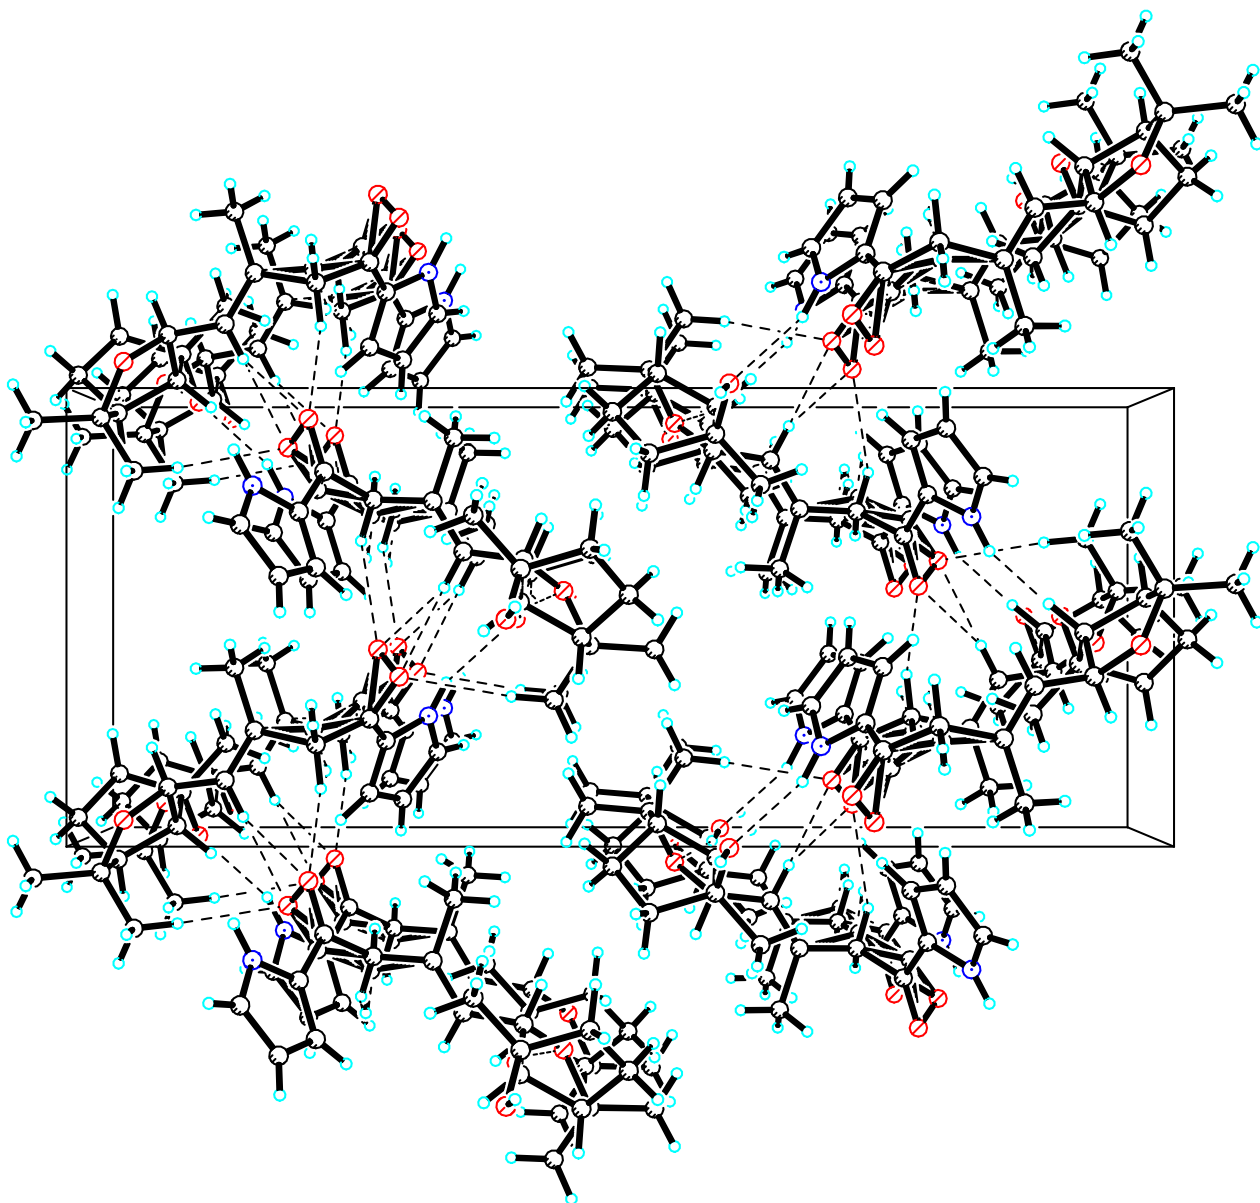

**Figure S3.** View of the pack drawing of strepyrrolin A (**1**).

Hydrogen-bonds are shown as dashed lines.

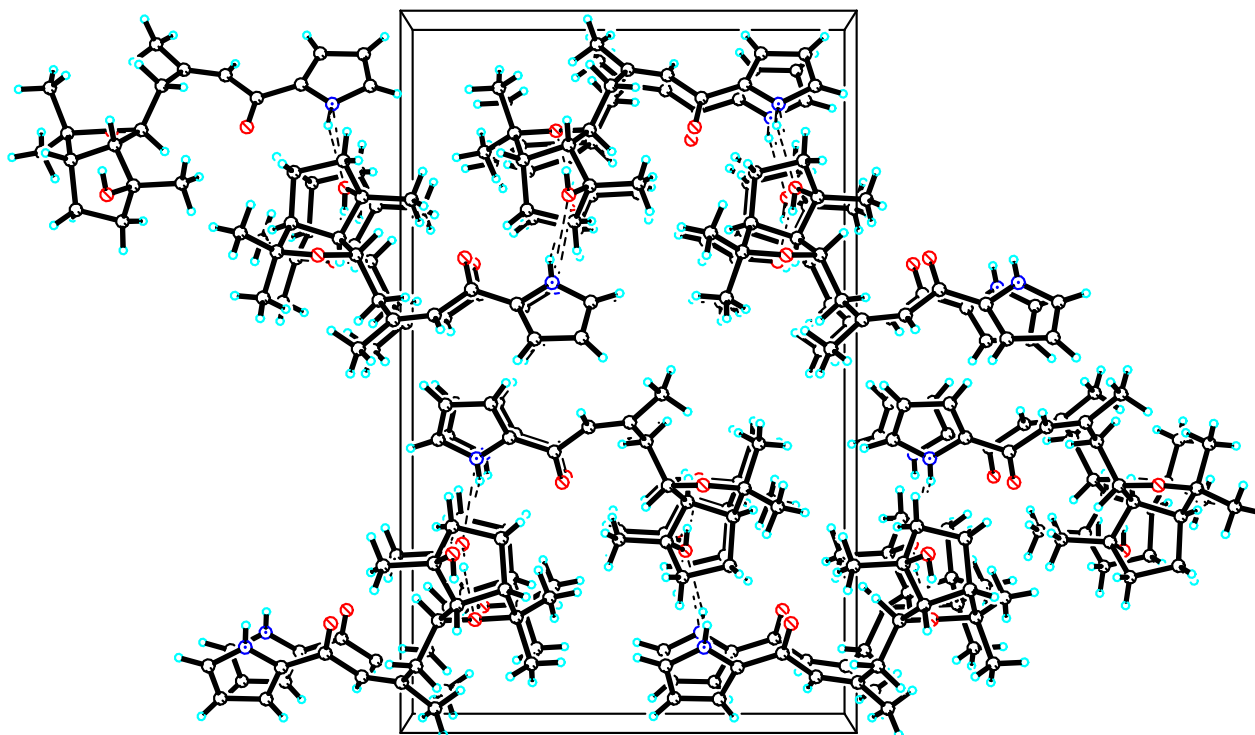

**Figure S4.** View of the pack drawing of compound 6.

Hydrogen-bonds are shown as dashed lines.

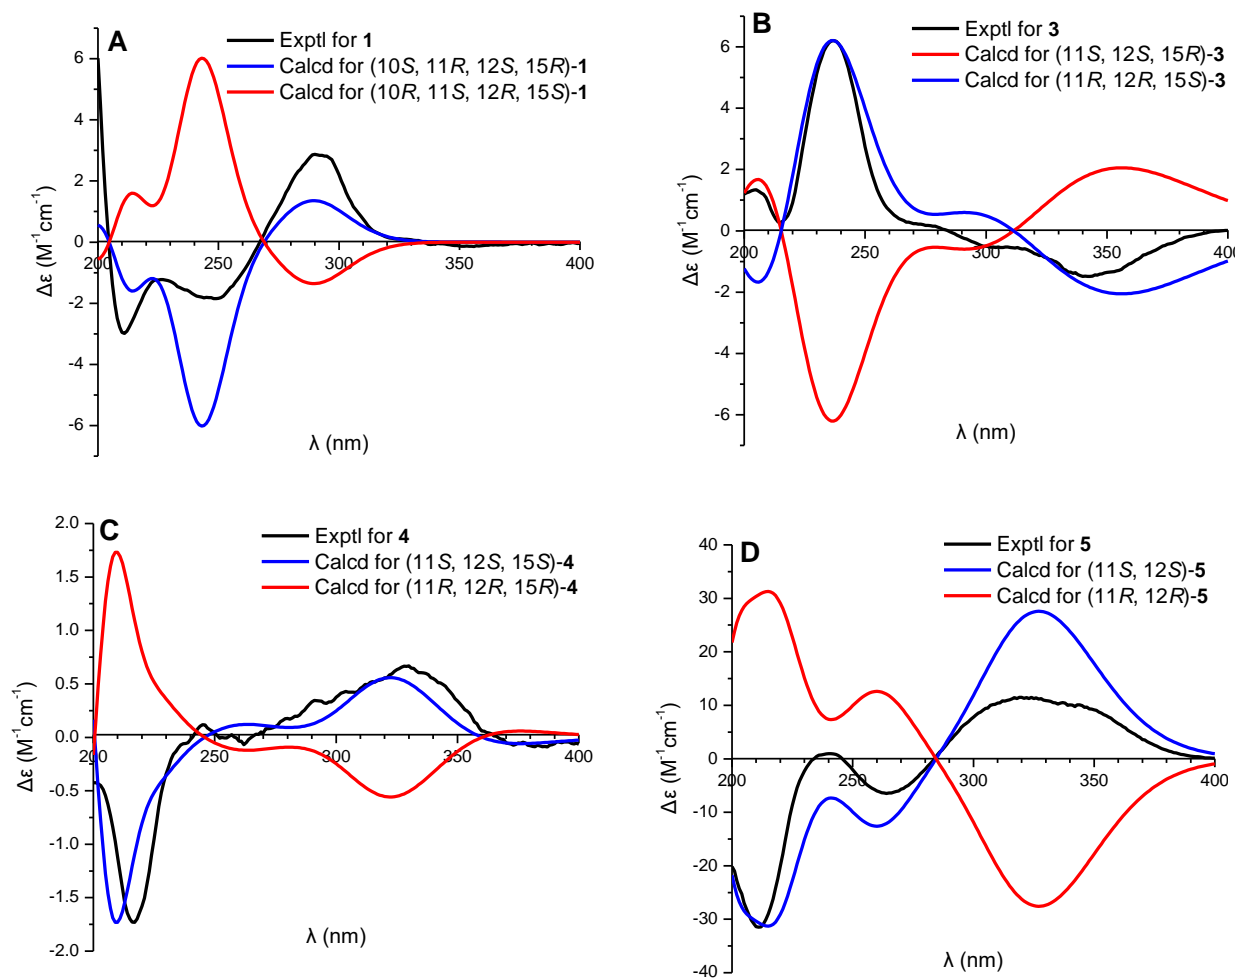

**Figure S5.** Calculated and experimental ECD spectra of compounds **1**, **3**, **4**, and **5**.

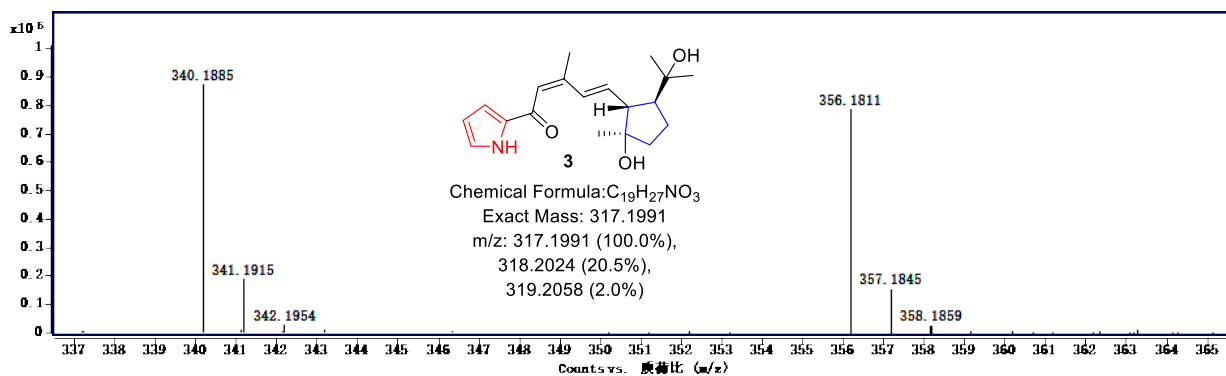

Figure S6. HR-ESI-MS spectrum of compound **3** fed with [ $^{13}\text{C}_5$ ,  $^{15}\text{N}$ ]-L-Pro. ( $m/z$  340.1885 [M + Na] $^+$ ;  $m/z$  356.1811 [M + K] $^+$ )

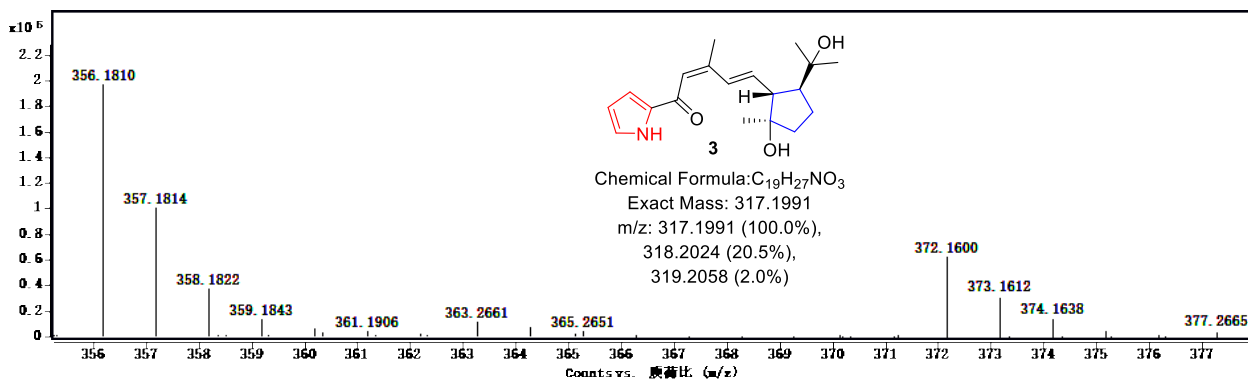

Figure S7. HR-ESI-MS spectrum ( $m/z$  [M + K] $^+$ ) of compound **3** fed with [ $^{13}\text{C}_5$ ,  $^{15}\text{N}$ ]-L-Glu.

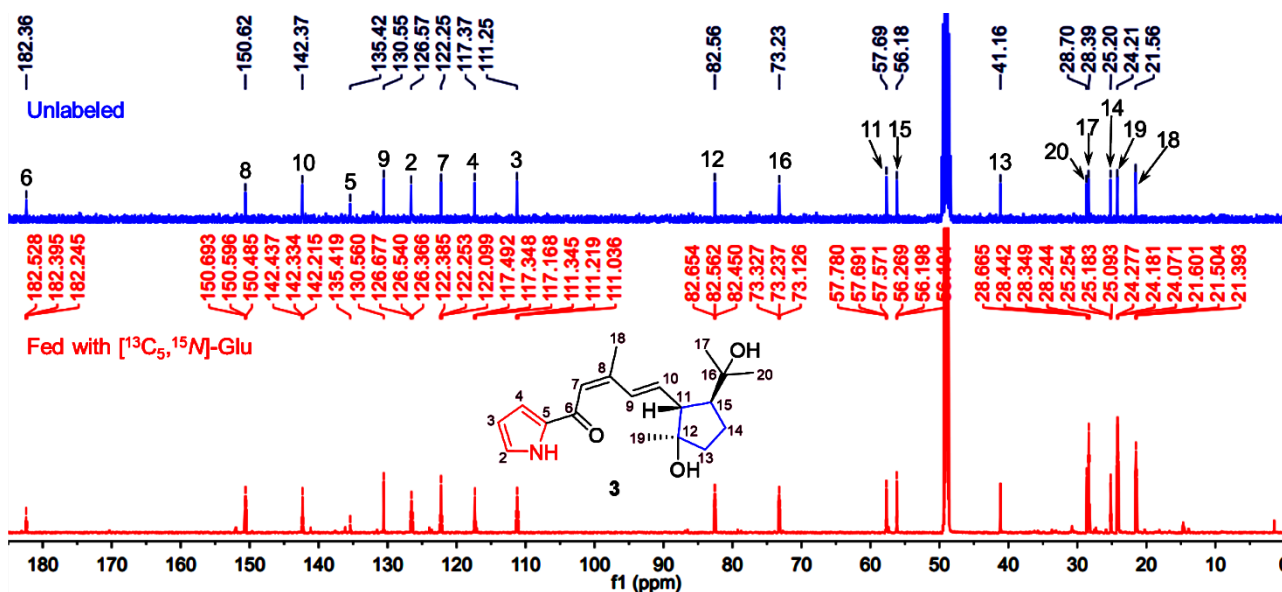

Figure S8.  $^{13}\text{C}$  NMR (200 MHz,  $\text{CD}_3\text{OD}$ ) spectrum of compound **3** fed with [ $^{13}\text{C}_5$ ,  $^{15}\text{N}$ ]-L-Glu.



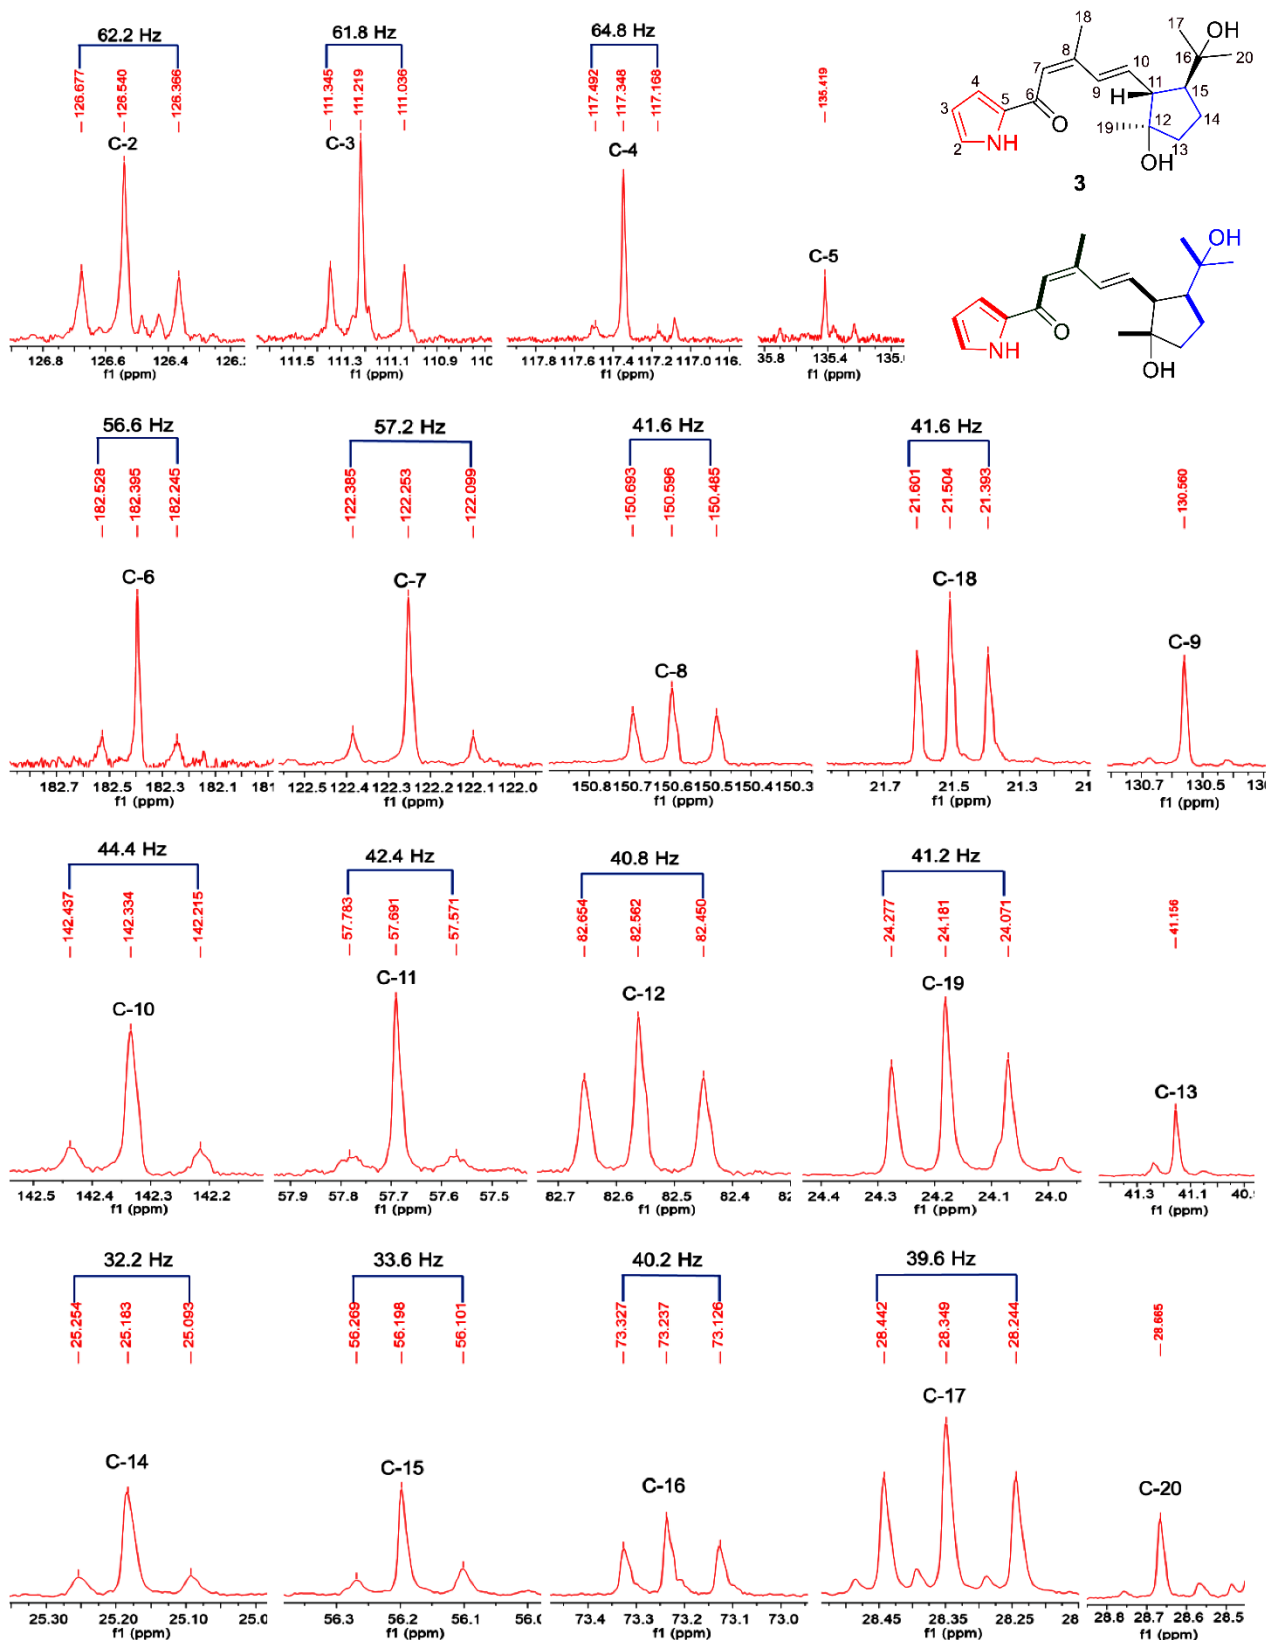

**Figure S9.** The multiplicity analysis of labeled carbons of compound **3** fed with  $[^{13}\text{C}_5, ^{15}\text{N}]$ -L-Glu. Each pair of coupled carbons was shown in bold bonds. The weak splitting peaks of C-4 were thought to be caused by C-5. The splitting signals of C-5 were not detected because of its long relaxation lifetime, as well as the low involvement of labeled  $^{13}\text{C}$ .

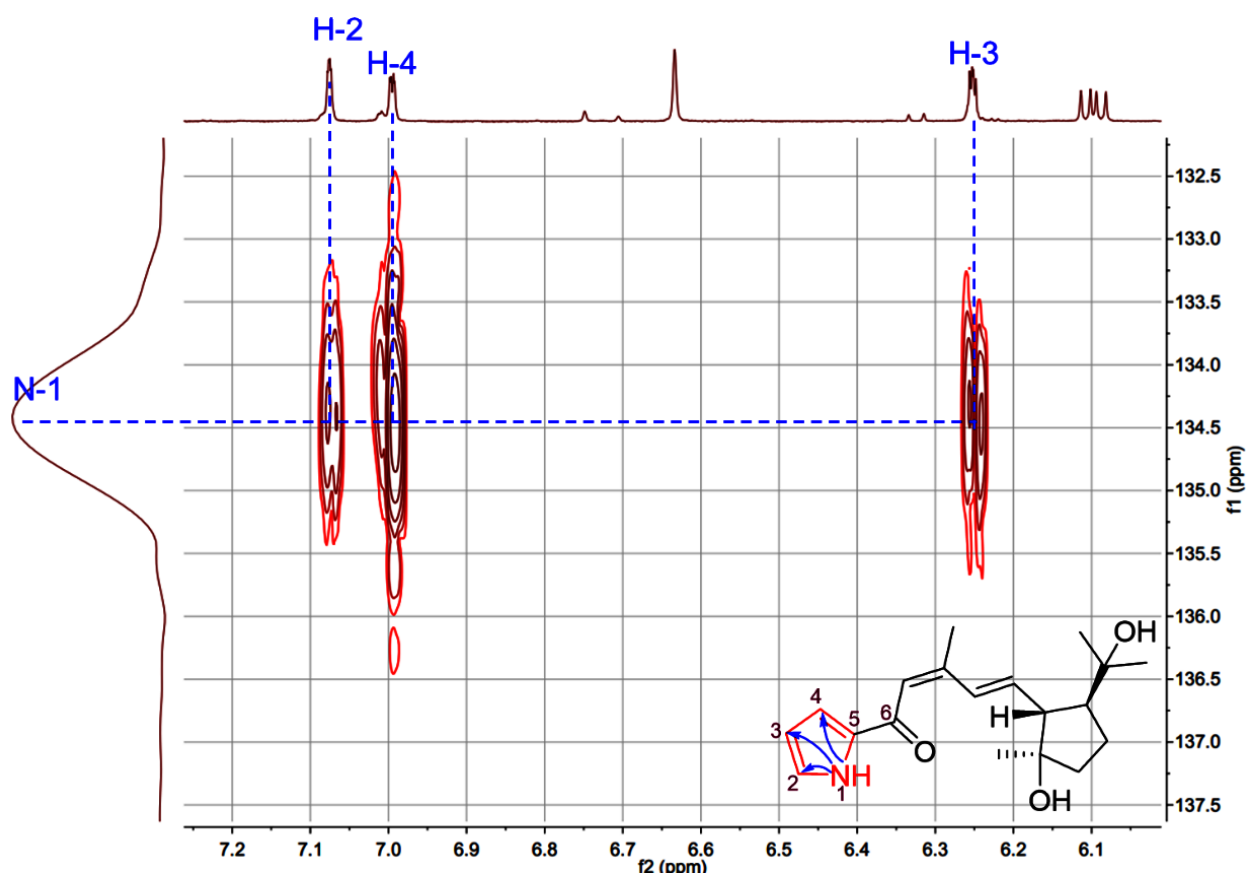

Figure S10.  $^1\text{H}$ - $^{15}\text{N}$  HMBC (800 MHz,  $\text{CD}_3\text{OD}$ ) spectrum of compound **3** fed with [ $^{13}\text{C}_5$ ,  $^{15}\text{N}$ ]-L-Glu.

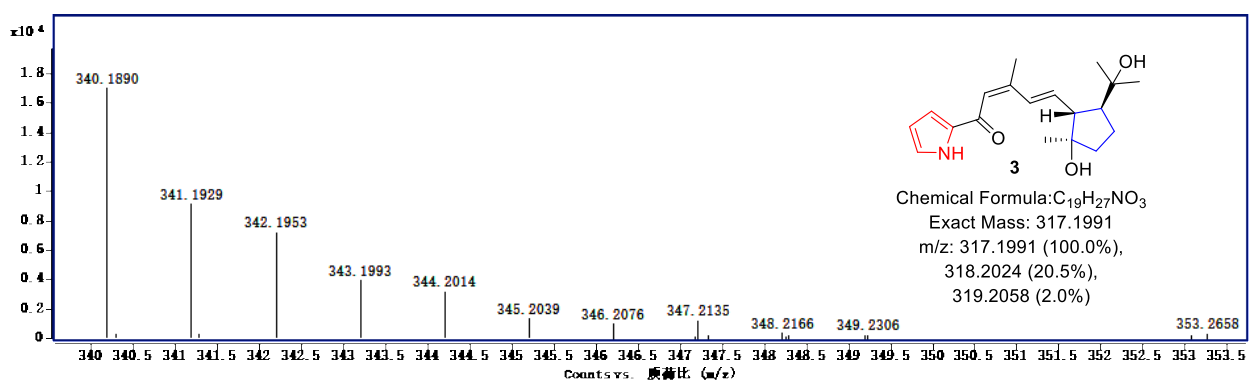

Figure S11. HR-ESI-MS spectrum ( $m/z$  [ $\text{M} + \text{Na}$ ] $^+$ ) of compound **3** fed with  $^{13}\text{C}_2$ -Gly.

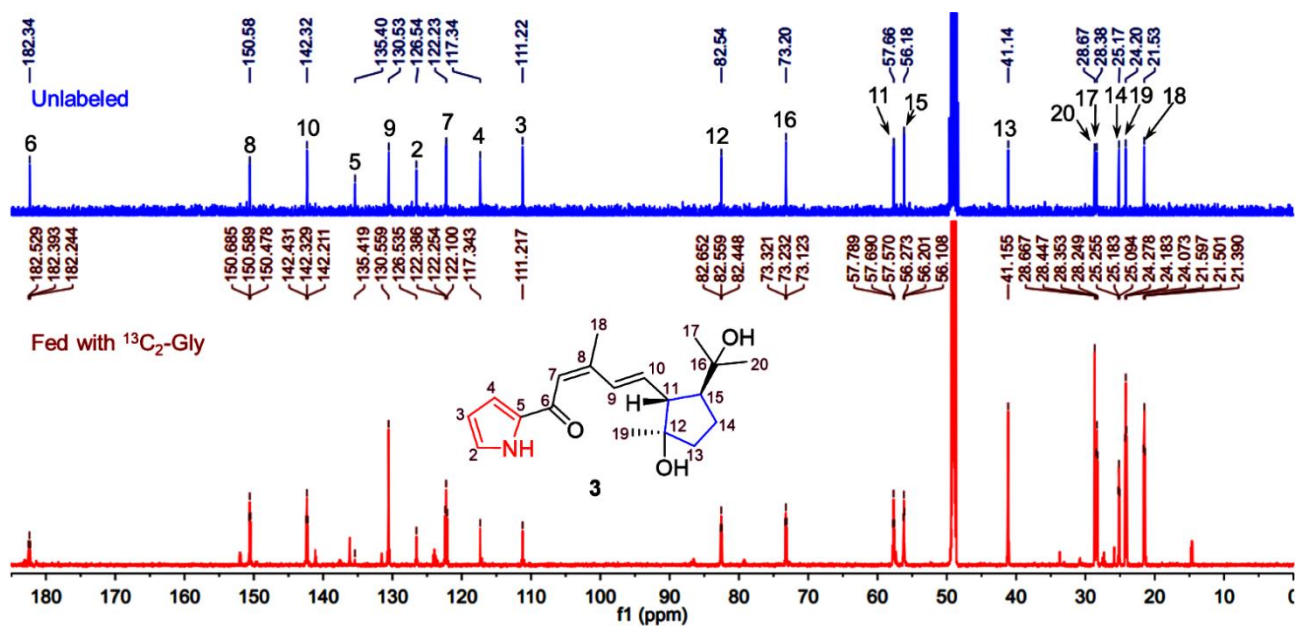

**Figure S12.**  $^{13}\text{C}$  NMR (200 MHz,  $\text{CD}_3\text{OD}$ ) spectrum of compound **3** fed with  $^{13}\text{C}_2\text{-Gly}$ .

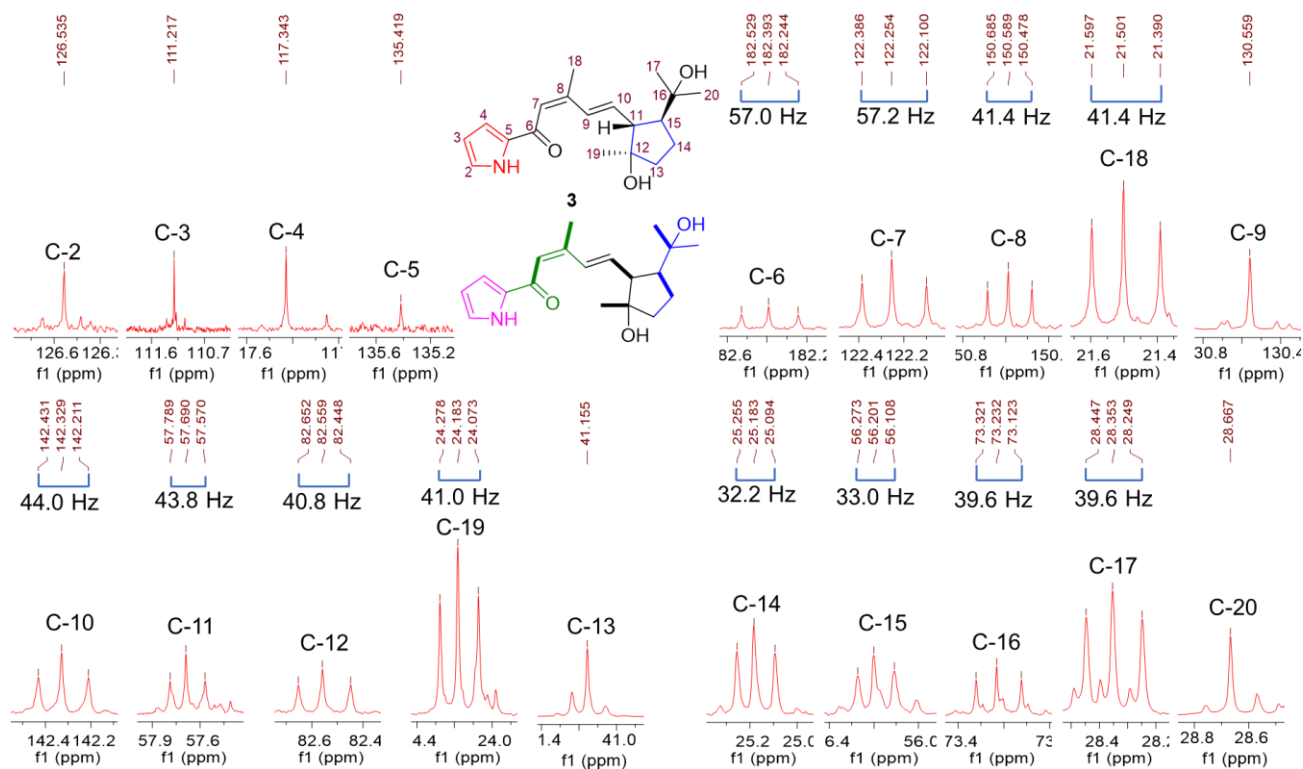

**Figure S13.** The multiplicity analysis of labeled carbons of compound **3** fed with  $^{13}\text{C}_2\text{-Gly}$ .

Each pair of coupled carbons was shown in bold bonds.

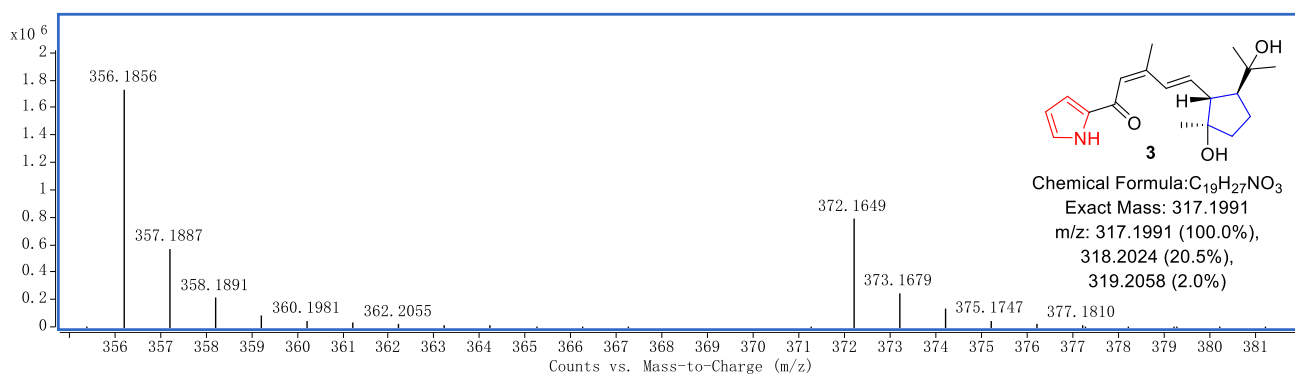

**Figure S14.** HR-ESI-MS spectrum ( $m/z$   $[M + K]^+$ ) of compound **3** fed with  $^{13}C_2$ -sodium acetate.

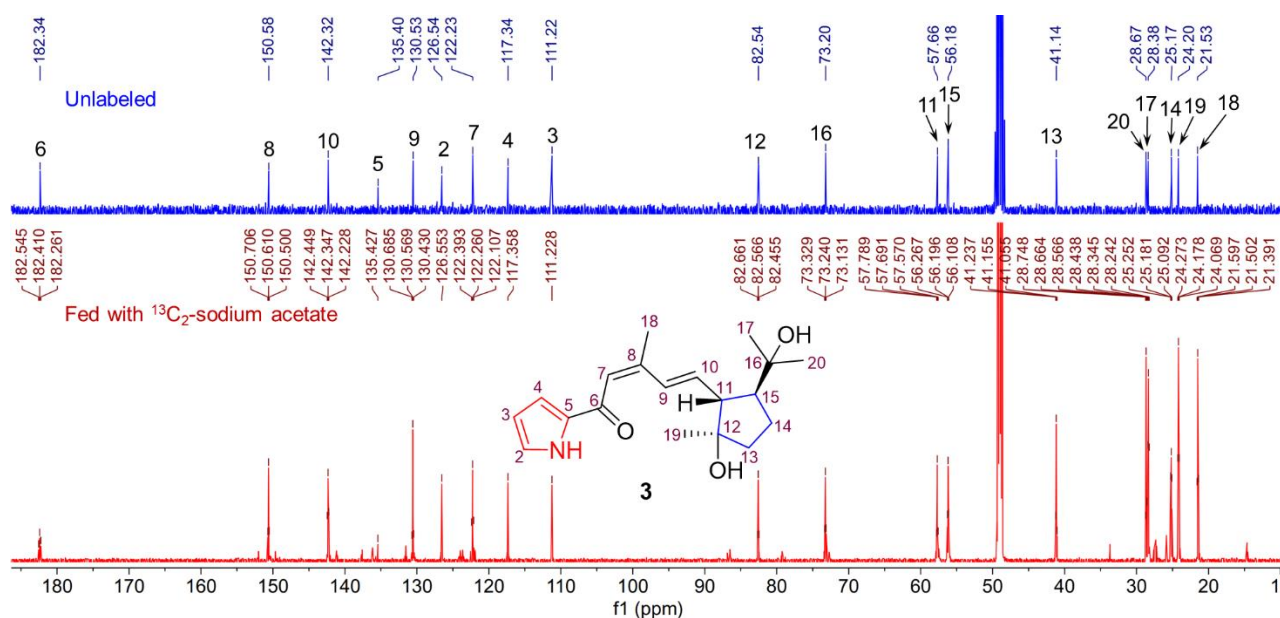

**Figure S15.**  $^{13}C$  NMR (200 MHz,  $CD_3OD$ ) spectrum of compound **3** fed with  $^{13}C_2$ -sodium acetate.

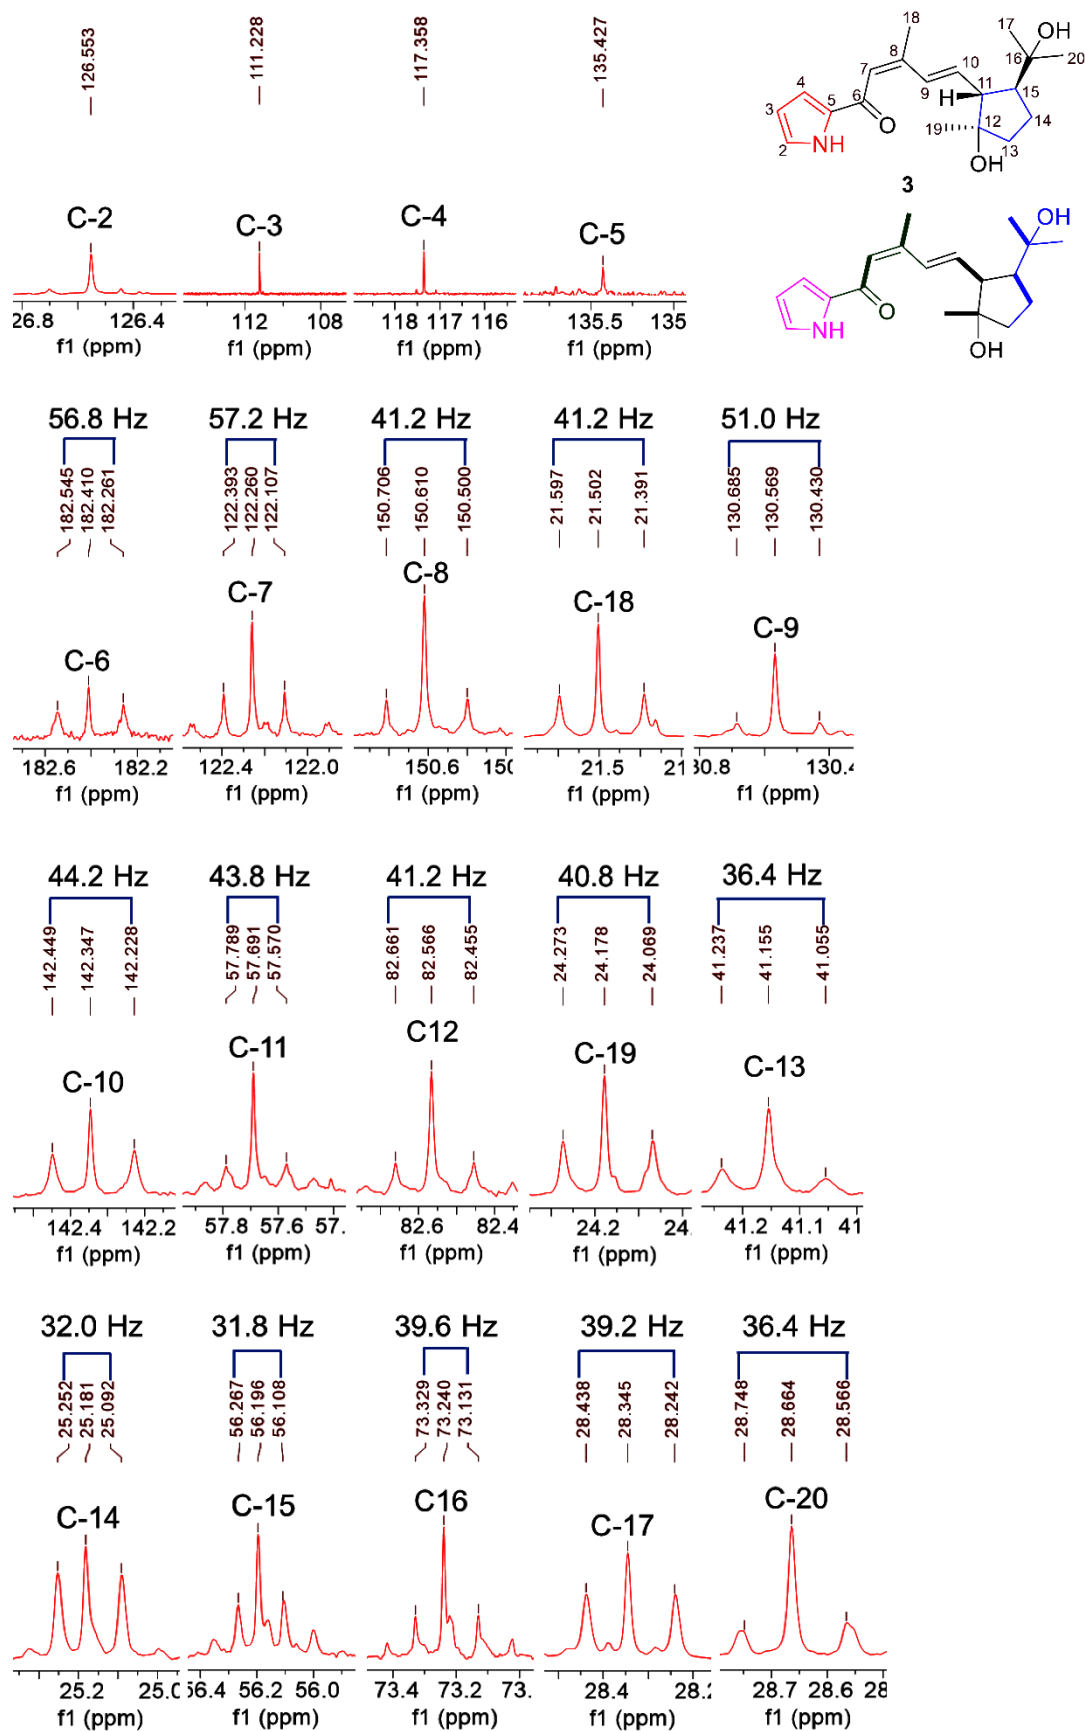

**Figure S16.** The multiplicity analysis of labeled carbons of compound **3** fed with  $^{13}\text{C}_2$ -sodium acetate. Each pair of coupled carbons was shown in bold bonds.

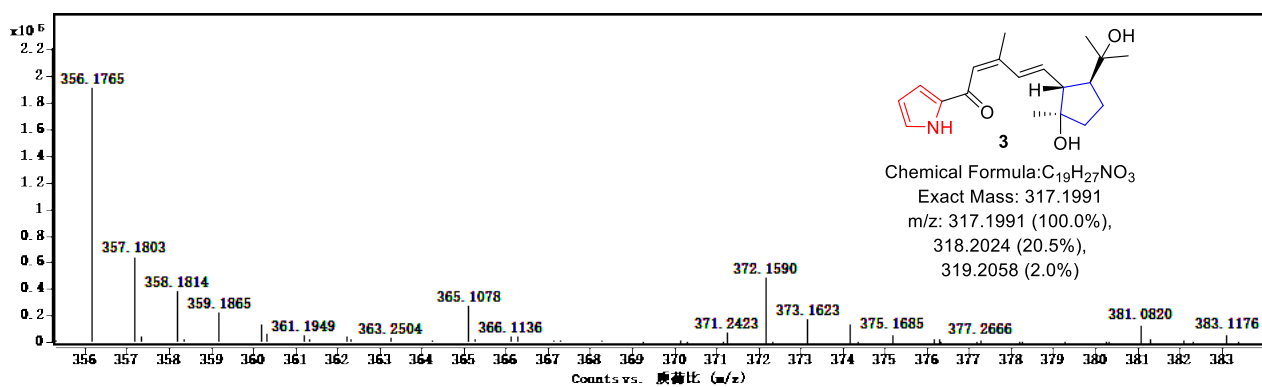

Figure S17. HR-ESI-MS spectrum ( $m/z$   $[M + K]^+$ ) of compound **3** fed with  $^{13}C_6$ -glucose.

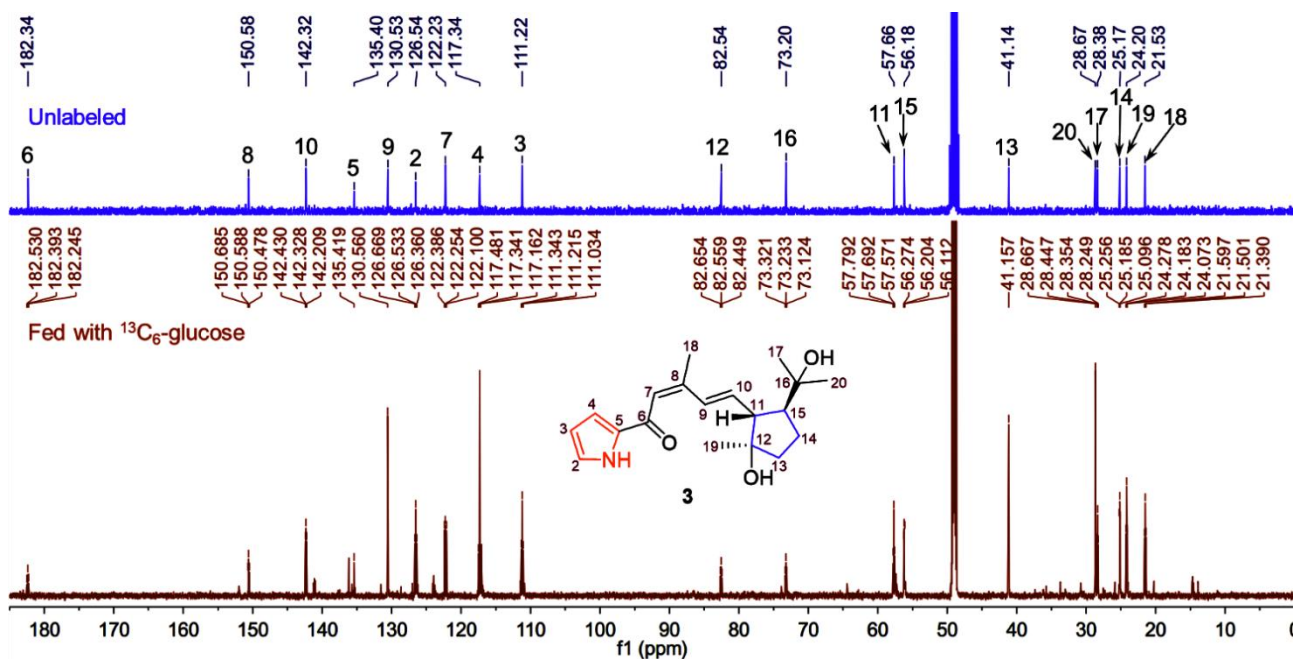

Figure S18.  $^{13}C$  NMR (200 MHz,  $CD_3OD$ ) spectrum of compound **3** fed with  $^{13}C_6$ -glucose.

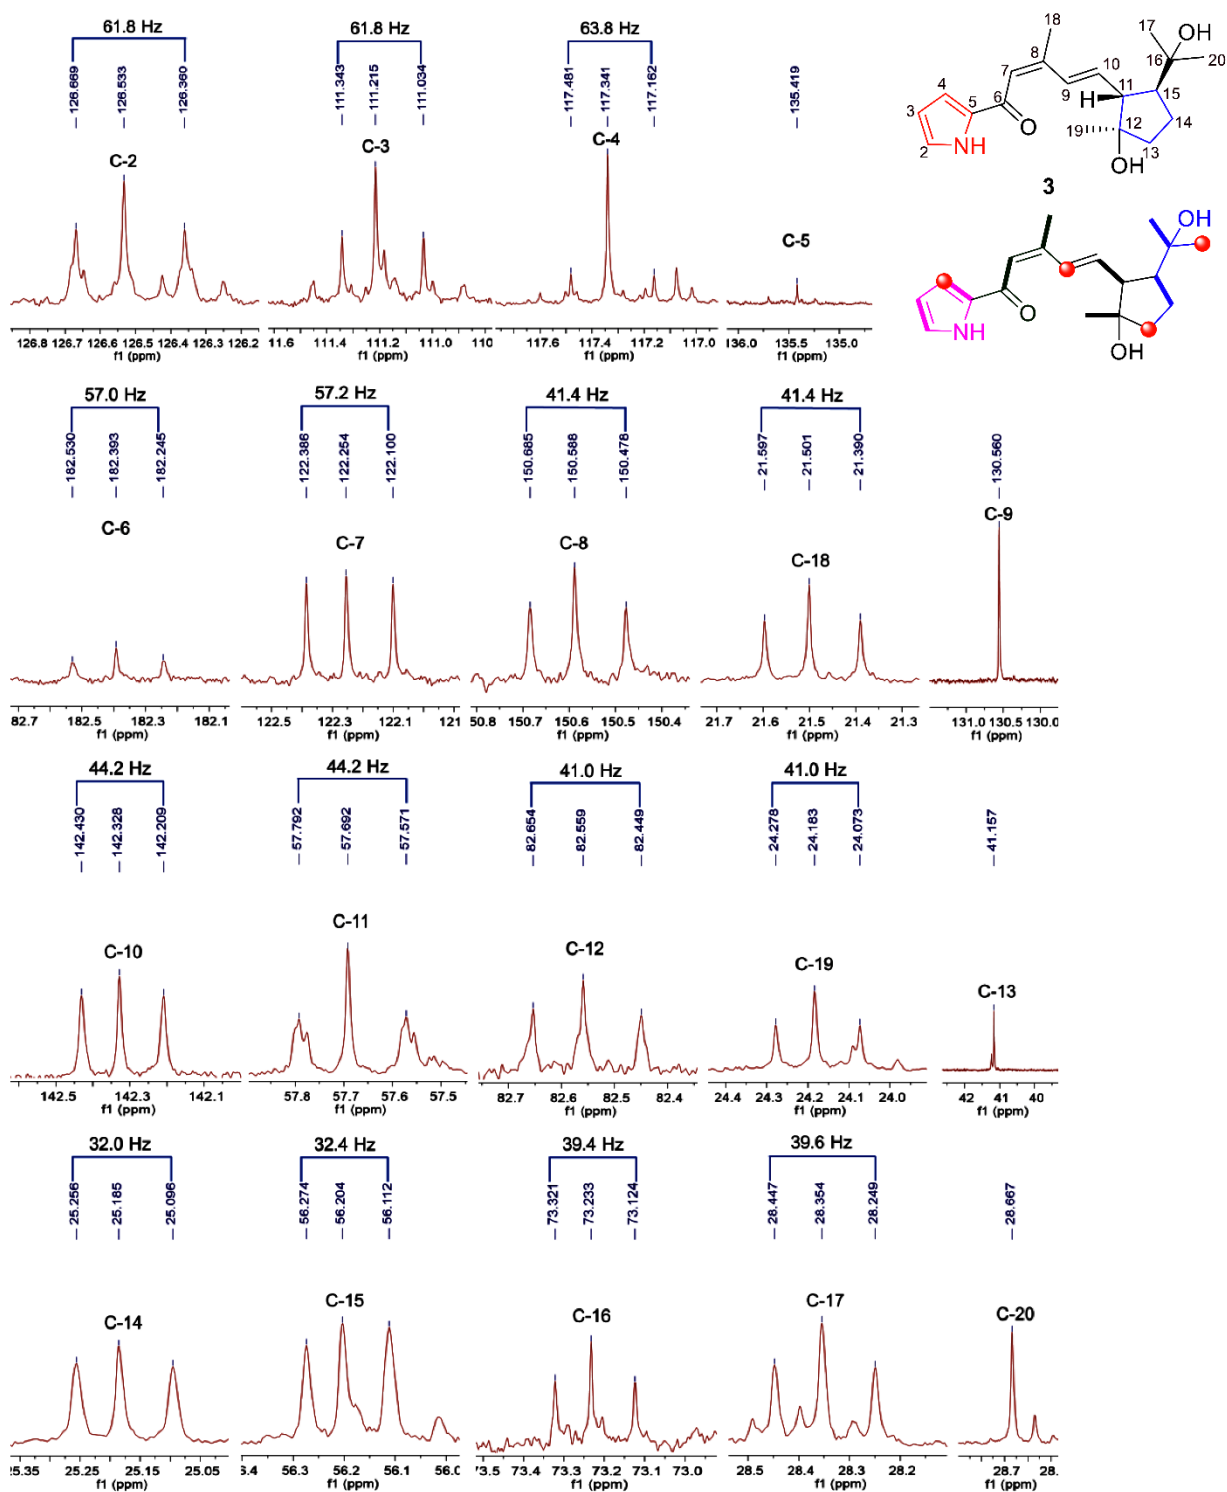

**Figure S19.** The multiplicity analysis of labeled carbons of compound **3** fed with  $^{13}\text{C}_6$ -glucose.

Each pair of coupled carbons was shown in bold bonds. The red dots represent the carbons showing a singlet with a much higher intensity. The weak splitting peaks of C-4 were thought to be caused by C-5. This deduction was verified by the following selective 1D gradient  $^{13}\text{C}$  COSY spectrum targeting C-4 (Figure S19).



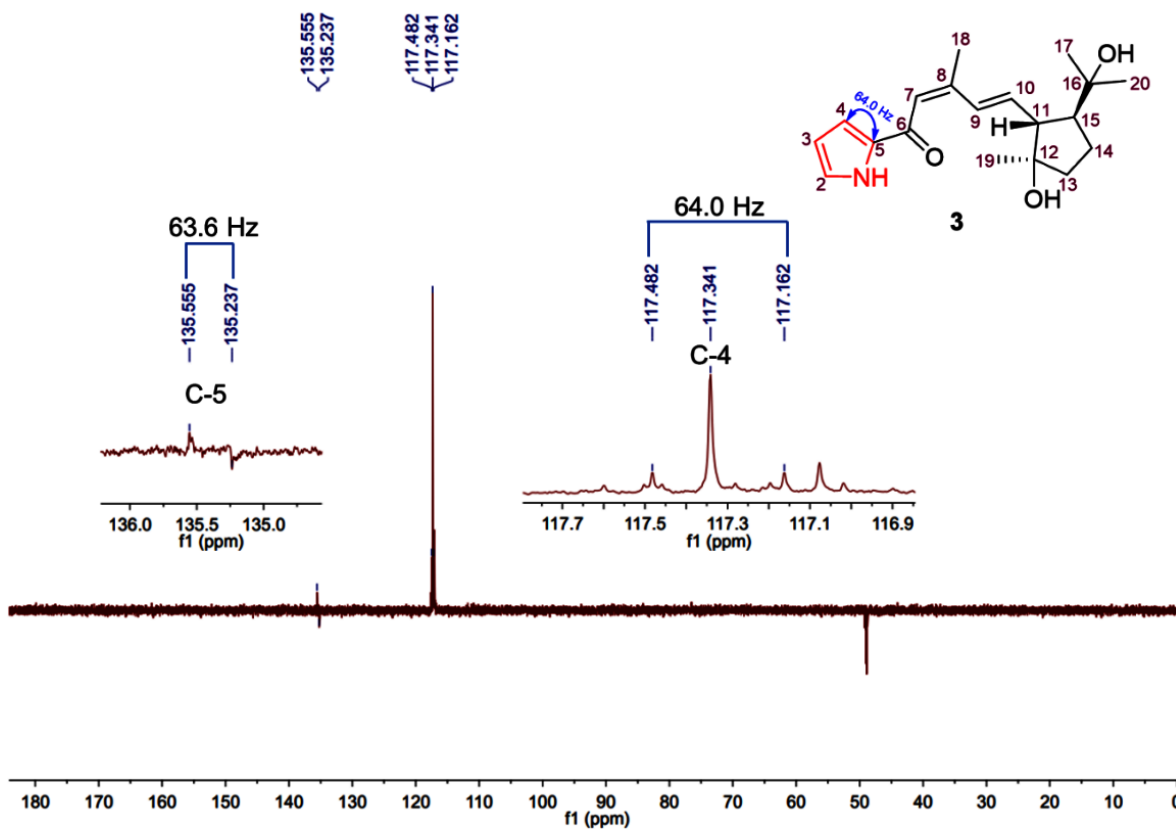

**Figure S20.** Selective gradient COSY (200 MHz) spectrum targeting C-4 of compound **3** fed with  $^{13}\text{C}_6$ -glucose.

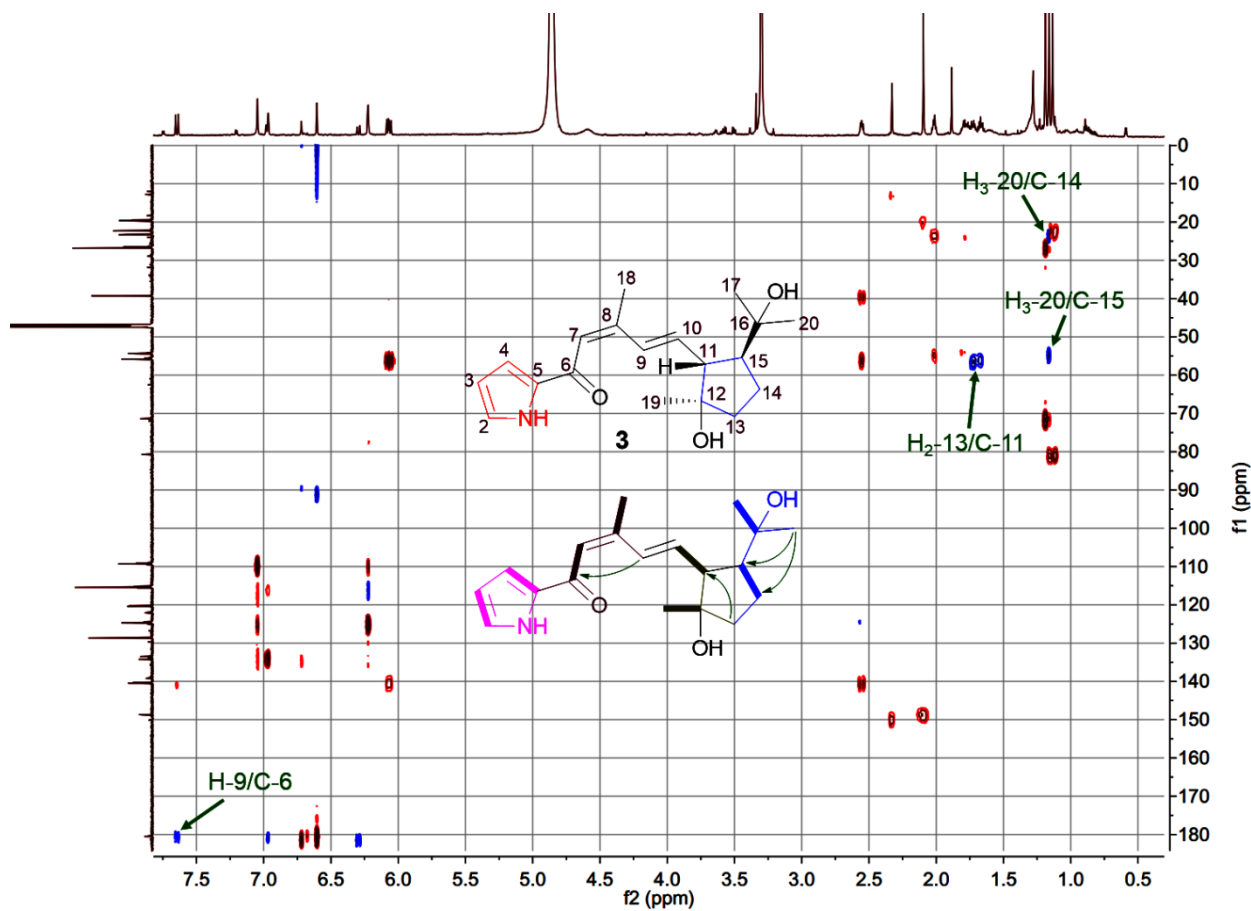

**Figure S21.** 1,n-ADEQUATE (800 MHz,  $\text{CD}_3\text{OD}$ ) spectrum of compound **3** fed with  $^{13}\text{C}_6$ -glucose.



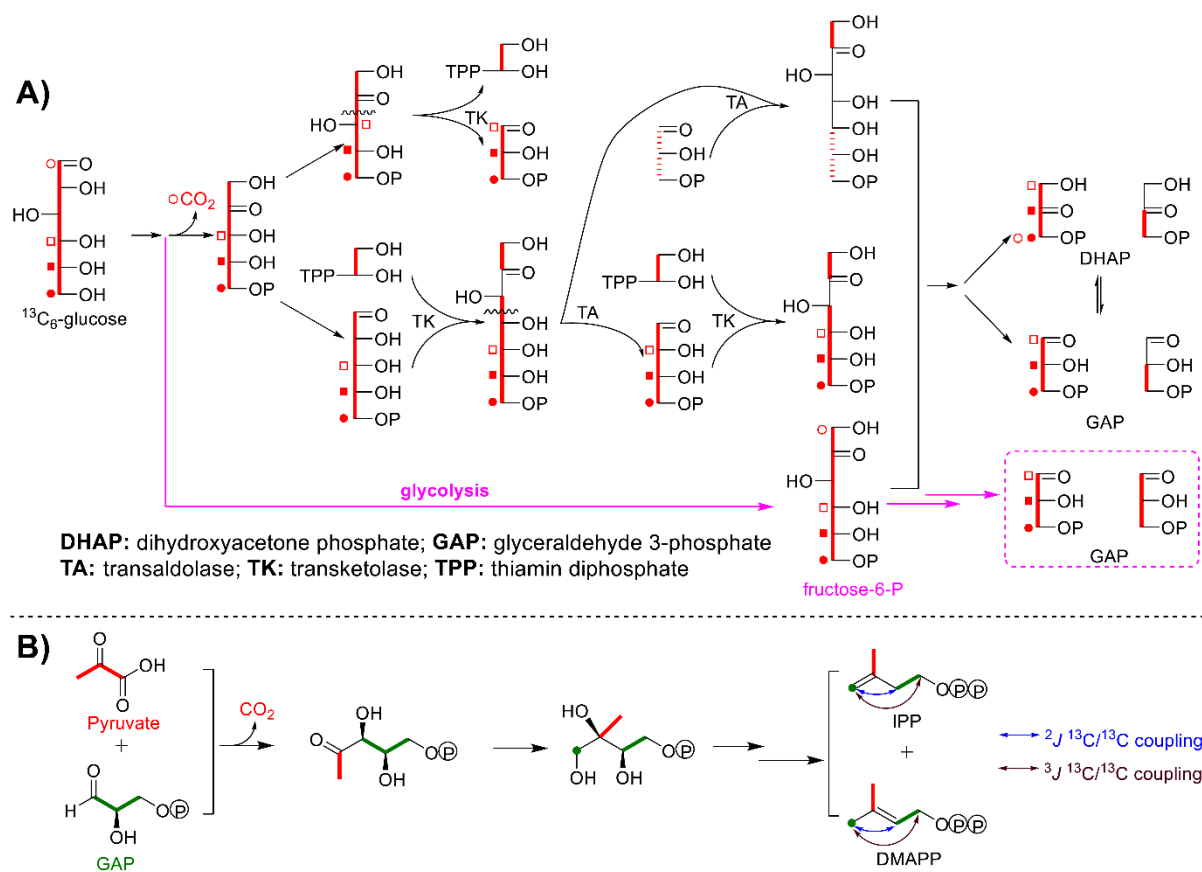

**Figure S22.** The analyses of labeling pattern of isoprenic units and <sup>13</sup>C/<sup>13</sup>C couplings in terpenoid moiety of **3** after incorporation of <sup>13</sup>C<sub>6</sub>-glucose.

(A) Involvement of the oxidative pentose phosphate cycle in glucose breakdown. (B) Labeling patterns of terpene precursors, IPP (isopentenyl diphosphate) and DMAPP (dimethylallyl diphosphate), via MEP (methylerythritol phosphate) pathway.

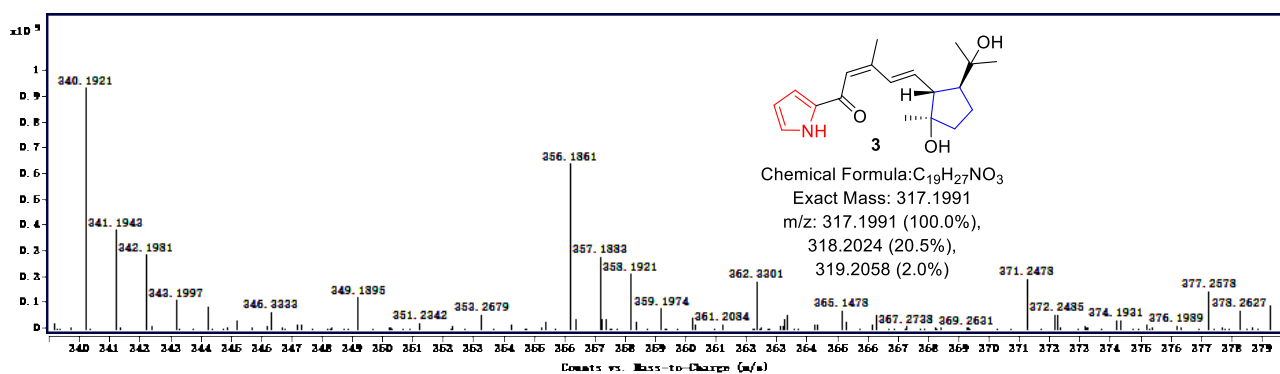

**Figure S23.** HR-ESI-MS spectrum of compound **3** fed with [<sup>13</sup>C<sub>3</sub>, <sup>15</sup>N]-L-Ala.

(*m/z* 340.1921 [M + Na]<sup>+</sup>, *m/z* 356.1861[M + K]<sup>+</sup>)

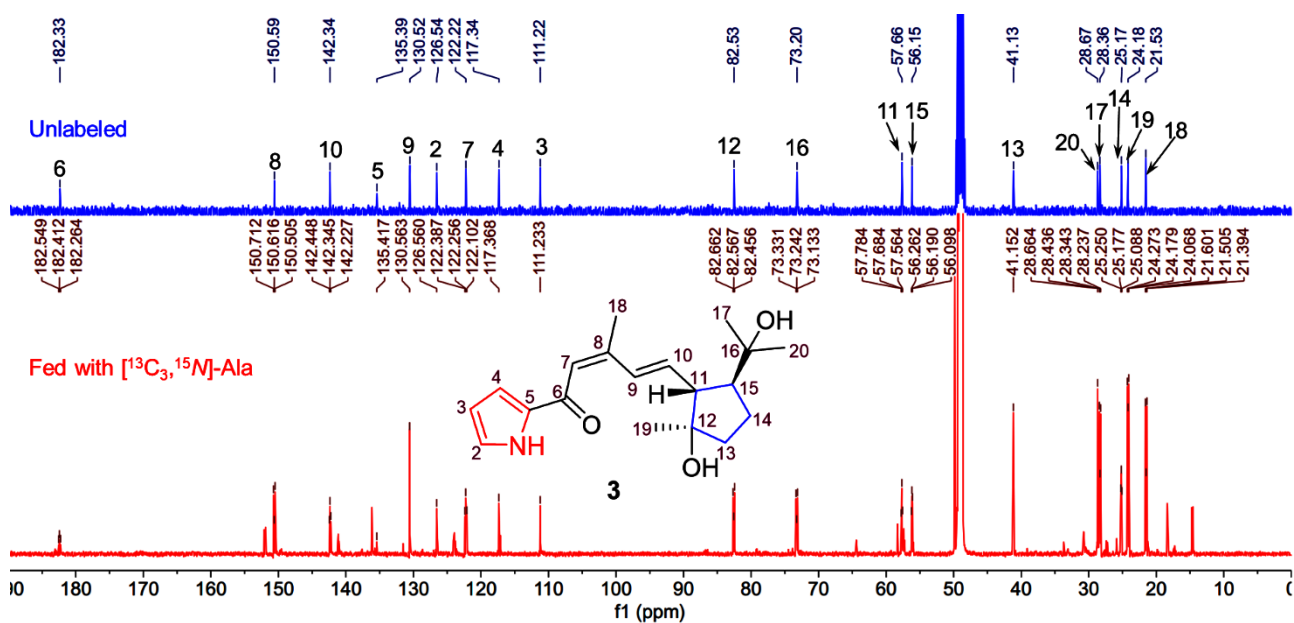

**Figure S24.** <sup>13</sup>C NMR (200 MHz, CD<sub>3</sub>OD) spectrum of compound **3** fed with [<sup>13</sup>C<sub>3</sub>, <sup>15</sup>N]-L-Ala.

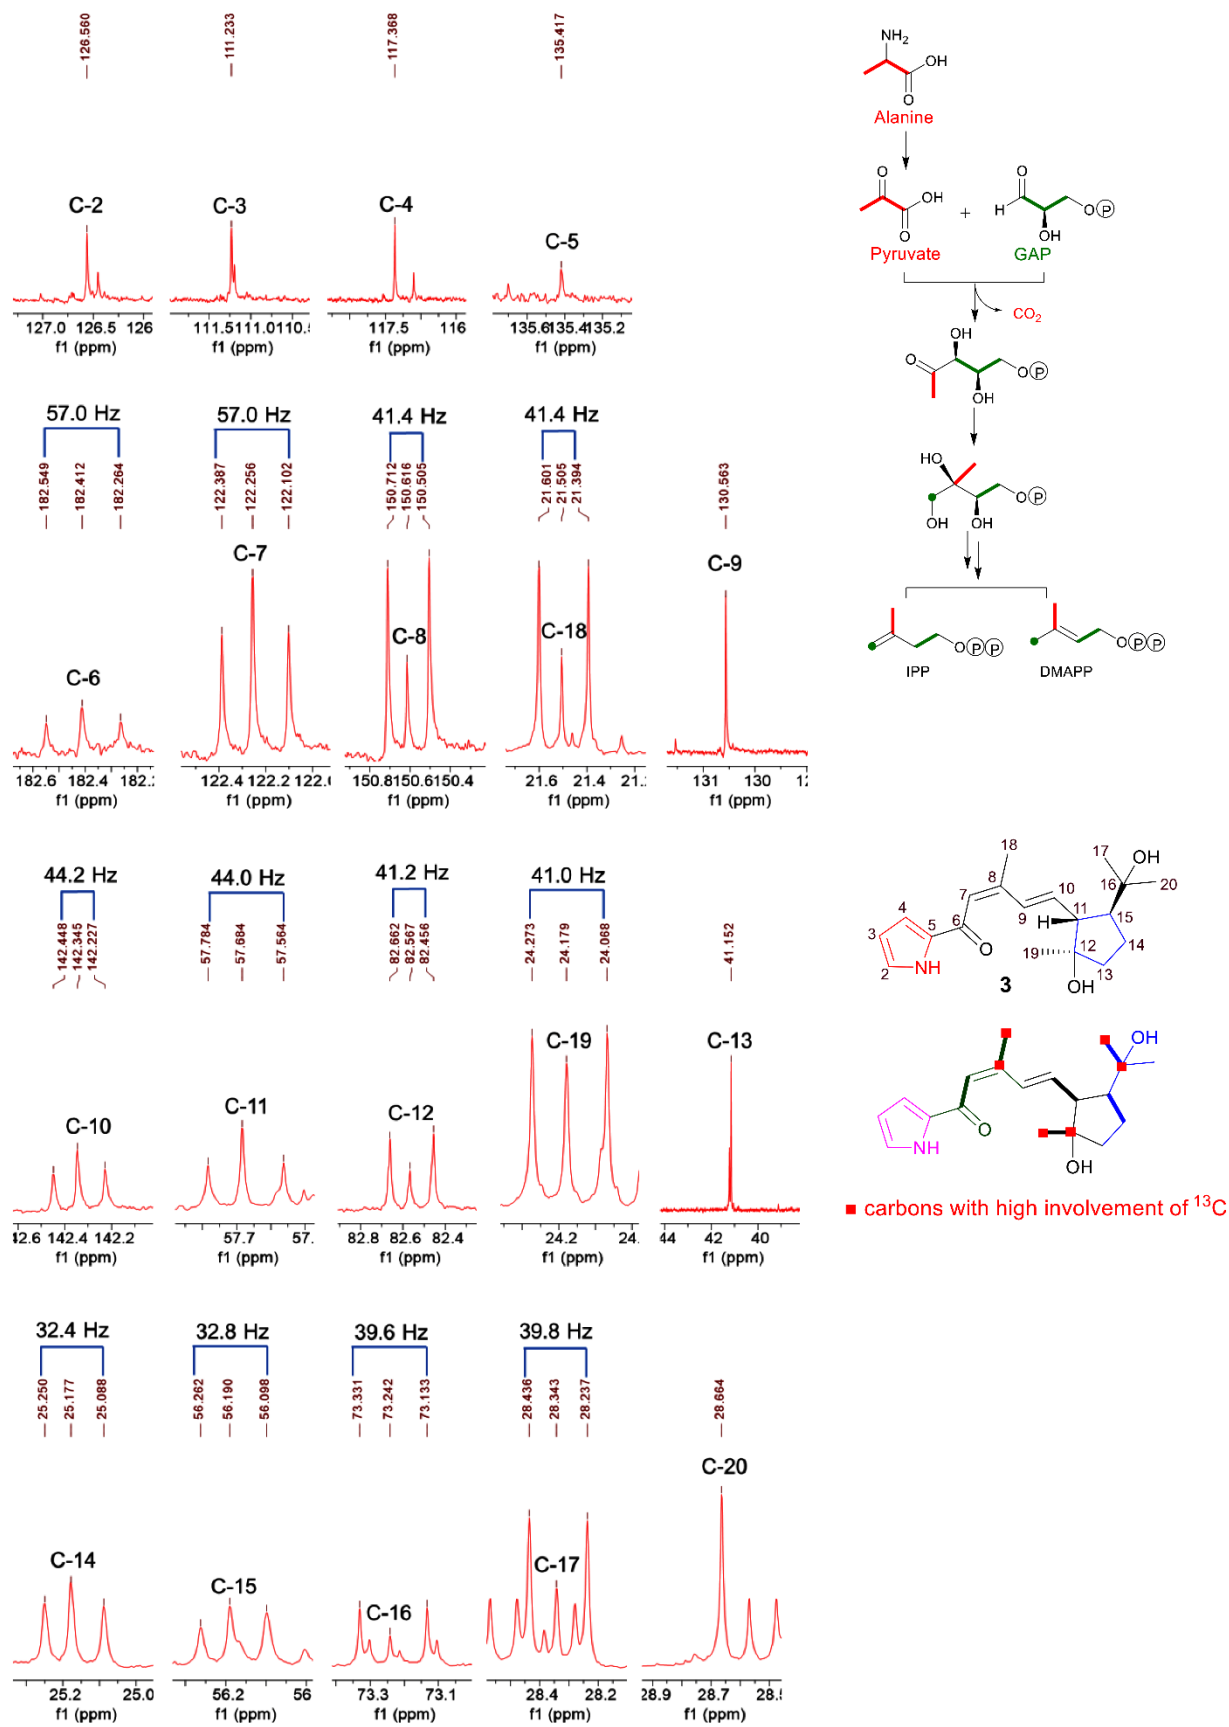

**Figure S25.** The multiplicity analysis of labeled carbons of compound **3** fed with  $[^{13}\text{C}_3, ^{15}\text{N}]$ -L-Ala.

Each pair of principally coupled carbons was shown in bold bonds.

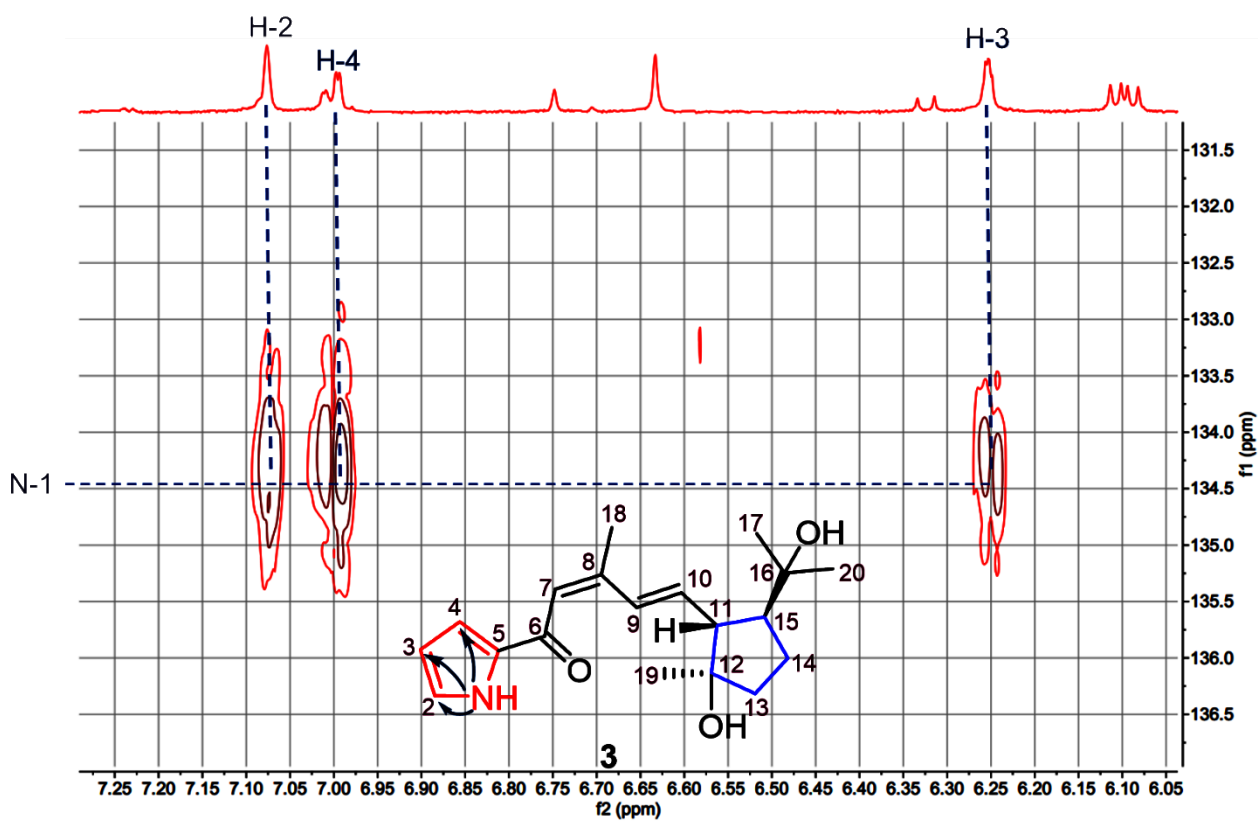

**Figure S26.**  $^1\text{H}$ - $^{15}\text{N}$  HMBC (800 MHz,  $\text{CD}_3\text{OD}$ ) spectrum of compound **3** fed with  $[^{13}\text{C}_3, ^{15}\text{N}]$ -L-Ala.

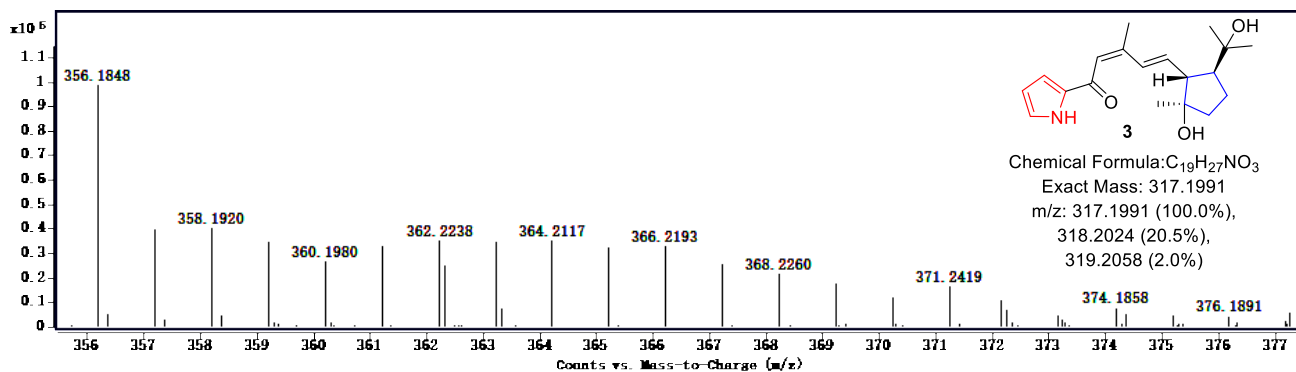

**Figure S27.** HR-ESI-MS spectrum ( $m/z$   $[\text{M} + \text{K}]^+$ ) of compound **3** fed with  $^{13}\text{C}_3$ -glycerol.

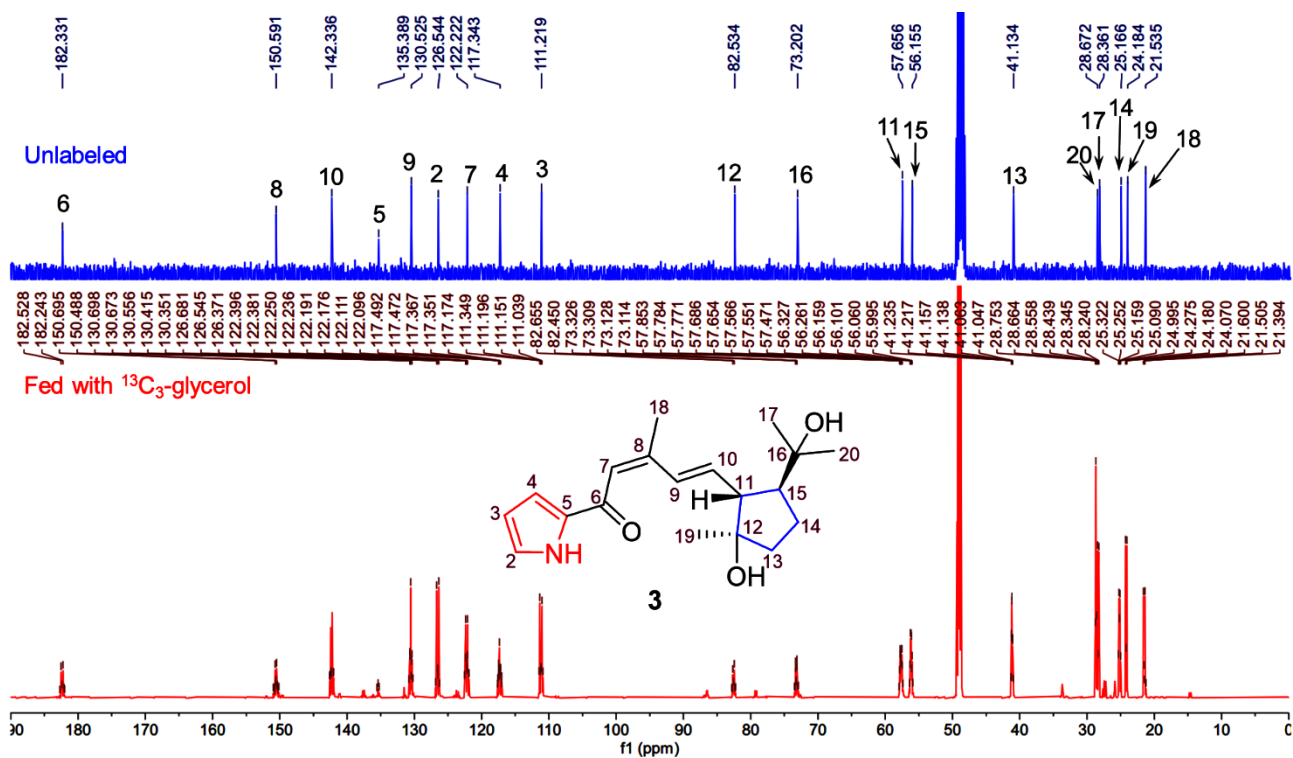

**Figure S28.**  $^{13}\text{C}$  NMR (200 MHz,  $\text{CD}_3\text{OD}$ ) spectrum of compound 3 fed with  $^{13}\text{C}_3$ -glycerol.

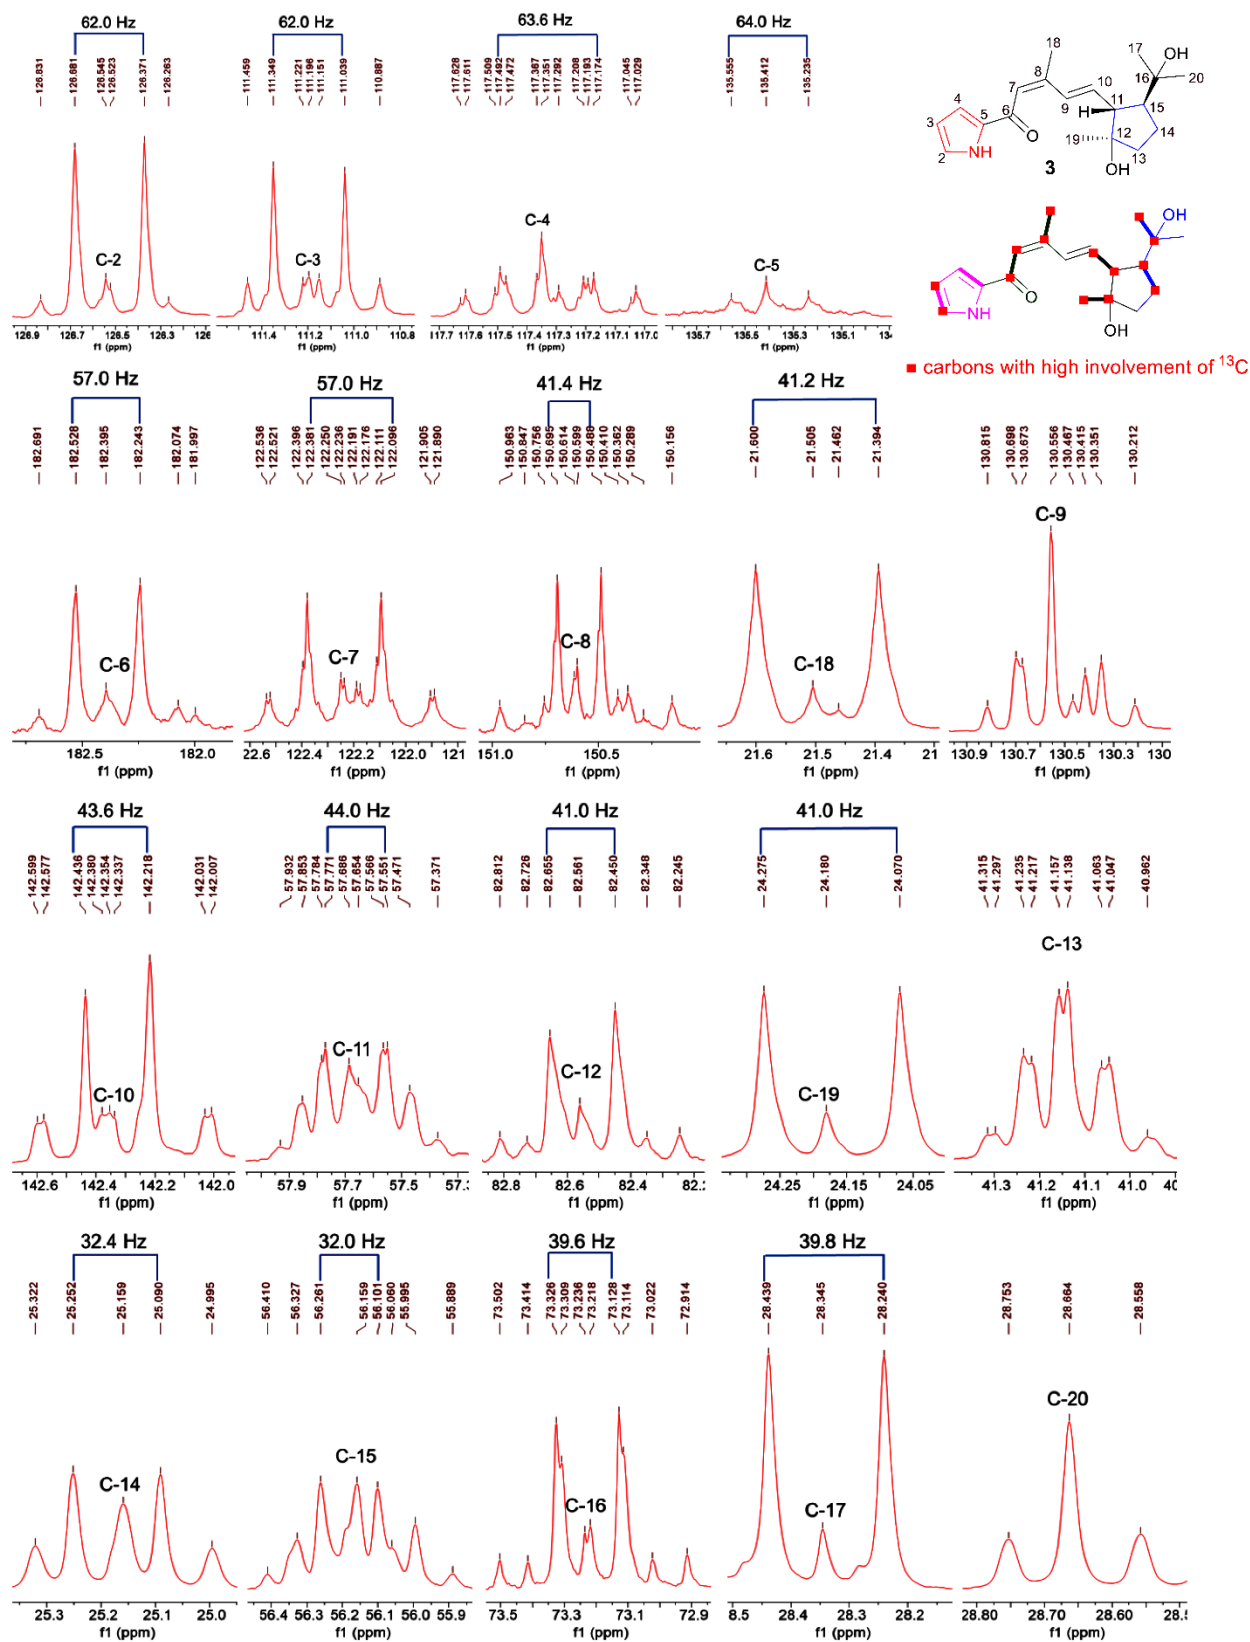

Figure S29. The multiplicity analysis of labeled carbons of compound **3** fed with  $^{13}\text{C}_3$ -glycerol.

Each pair of the principally coupled carbons was shown in bold bonds.

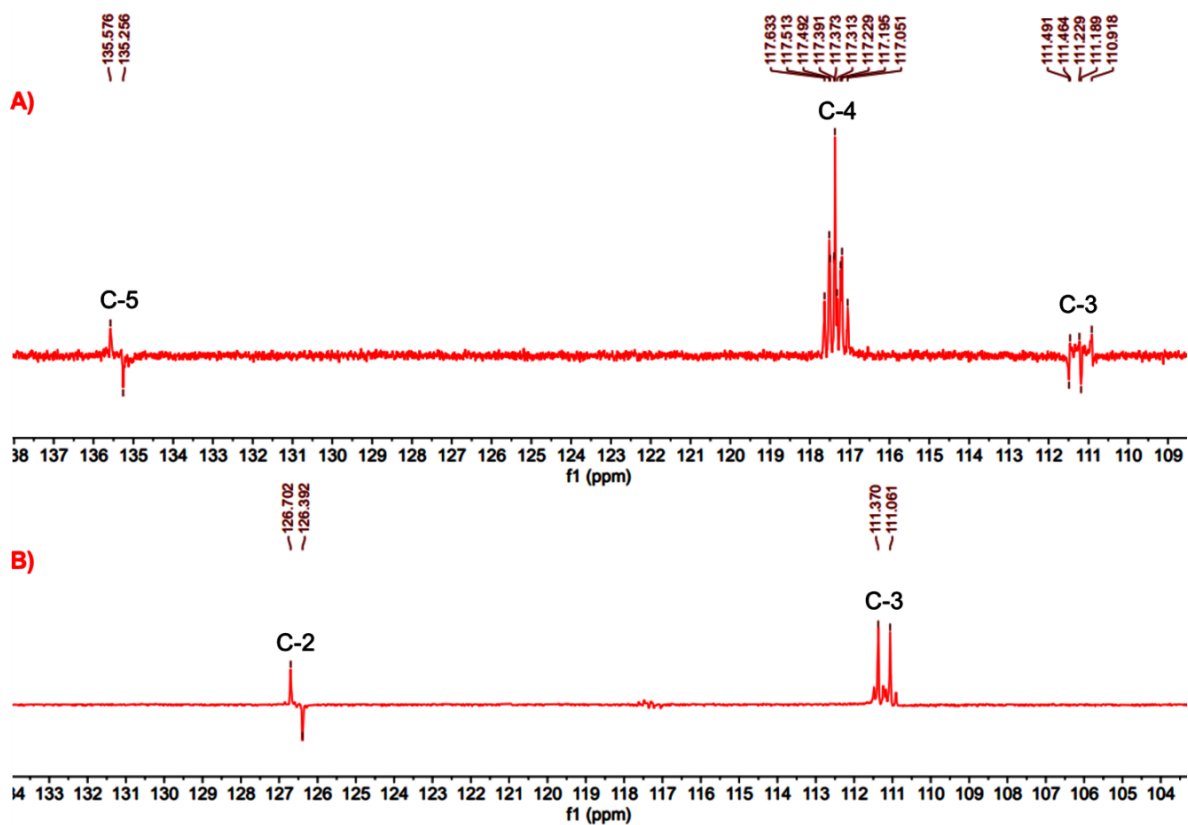

**Figure S30.** Selective gradient COSY (200 MHz) spectra targeting C-4 (A) and C-3 (B) of compound **3** fed with  $^{13}\text{C}_3$ -glycerol.

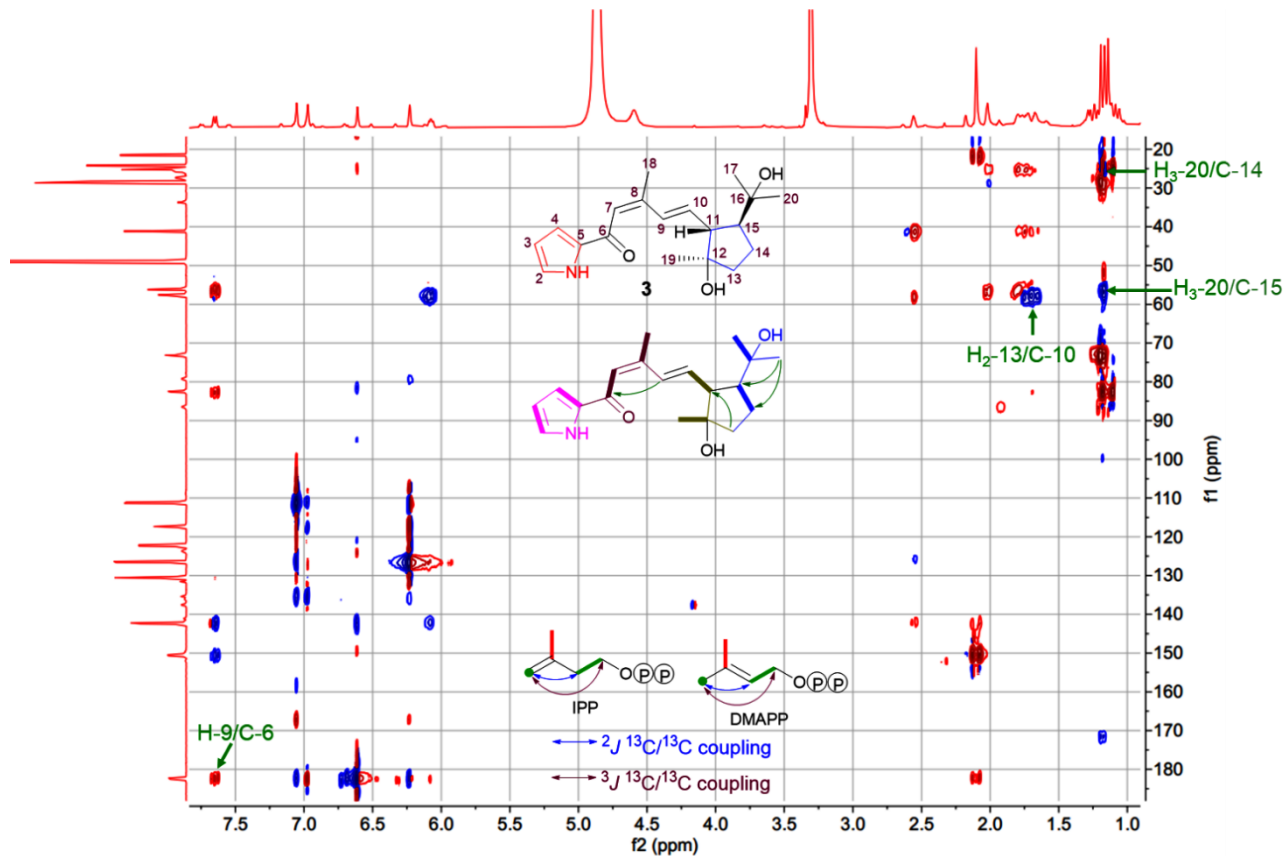

**Figure S31.** 1,n-ADEQUATE (800 MHz,  $\text{CD}_3\text{OD}$ ) spectrum of compound **3** fed with  $^{13}\text{C}_3$ -glycerol.

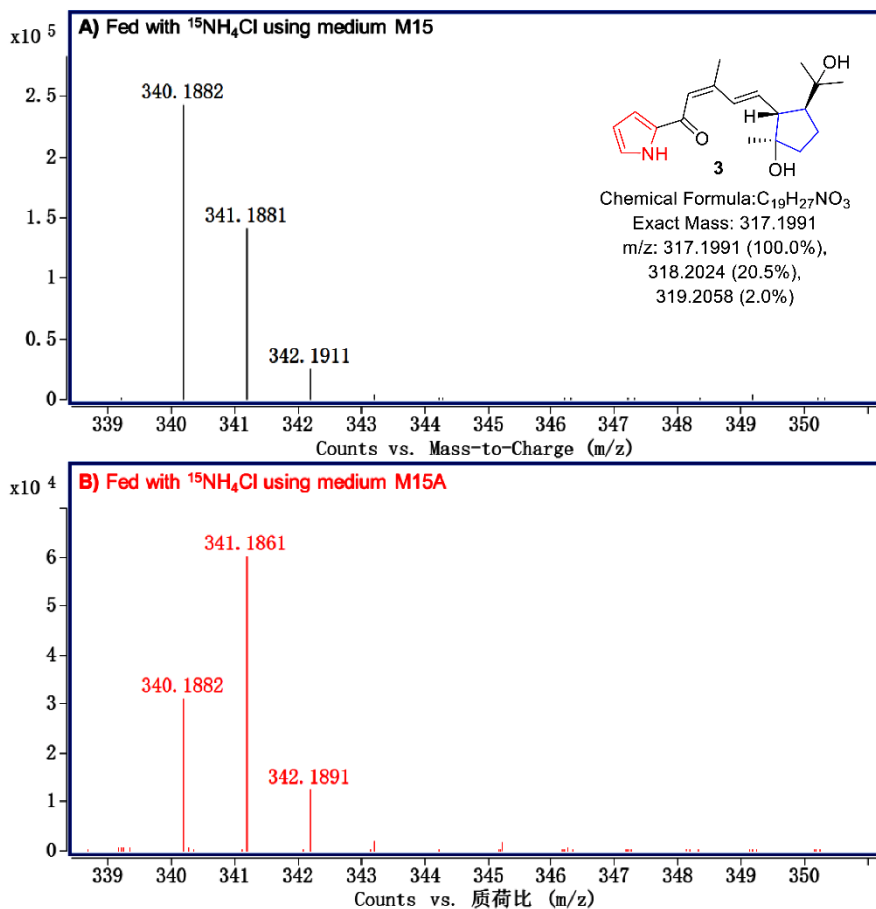

**Medium M15:** glucose 30 g/L, beef extract 5 g/L, peptone 1 g/L, NaCl 5 g/L,  $\text{CaCO}_3$  3 g/L, pH 7.2

**Medium M15A:** glucose 30 g/L, beef extract 1 g/L, peptone 1 g/L, NaCl 5 g/L,  $\text{CaCO}_3$  3 g/L, pH 7.2

**Figure S32.** HR-ESI-MS spectra ( $m/z$   $[\text{M} + \text{Na}]^+$ ) of compound **3** fed with  $^{15}\text{NH}_4\text{Cl}$ .



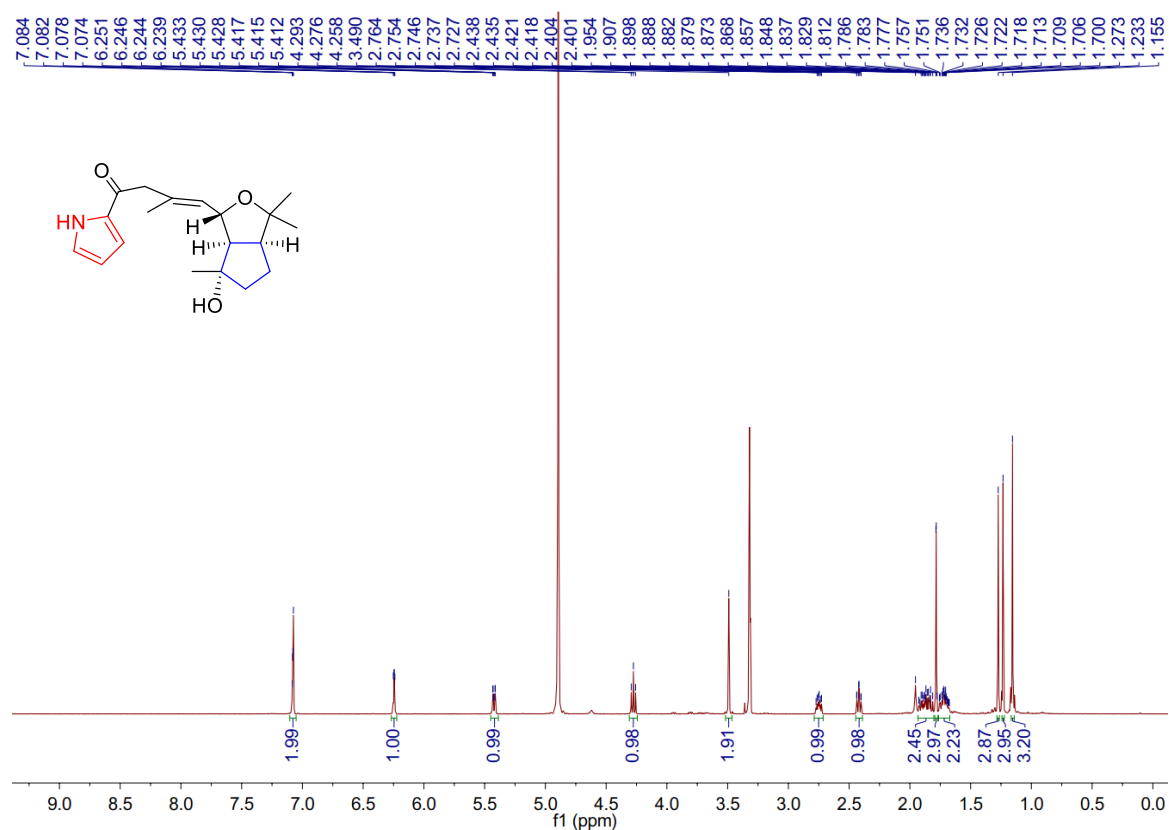

Figure S33. <sup>1</sup>H NMR (500 MHz) spectrum of 1 in CD<sub>3</sub>OD.

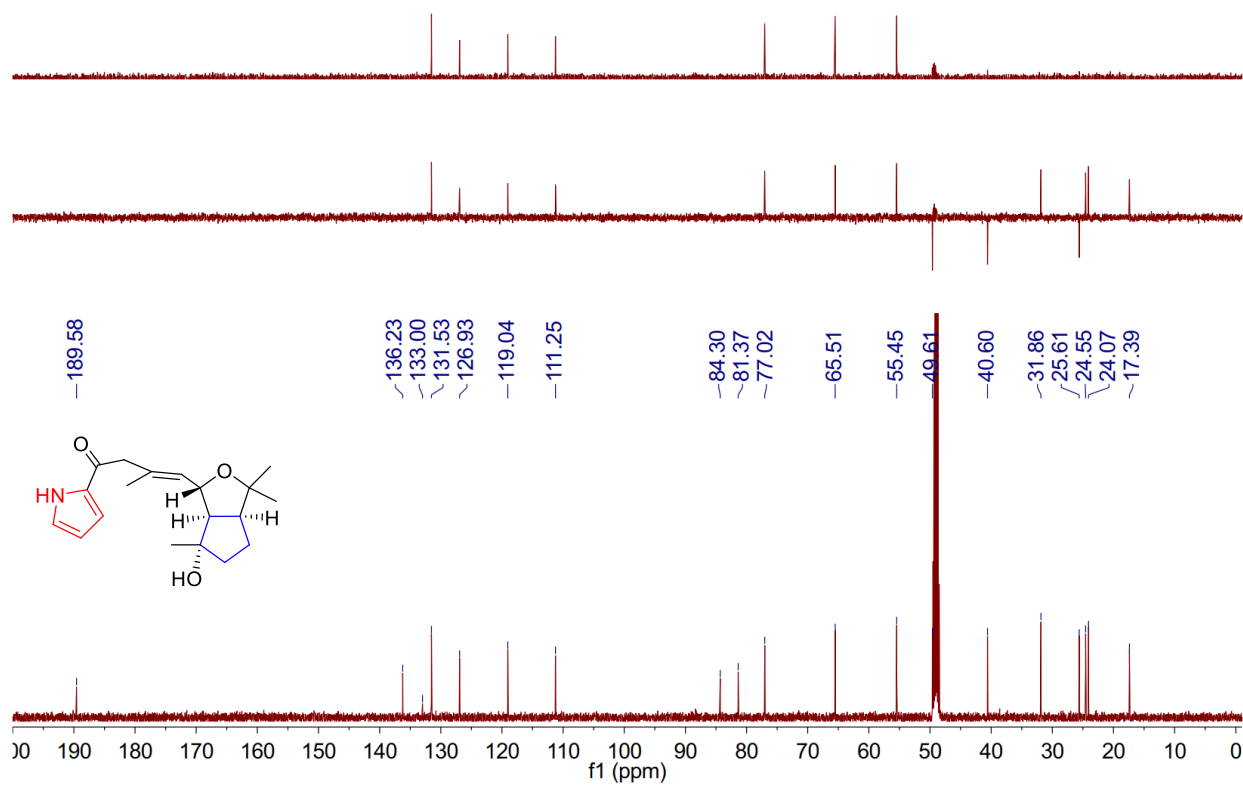

Figure S34. <sup>13</sup>C NMR (125 MHz) spectrum of 1 in CD<sub>3</sub>OD.

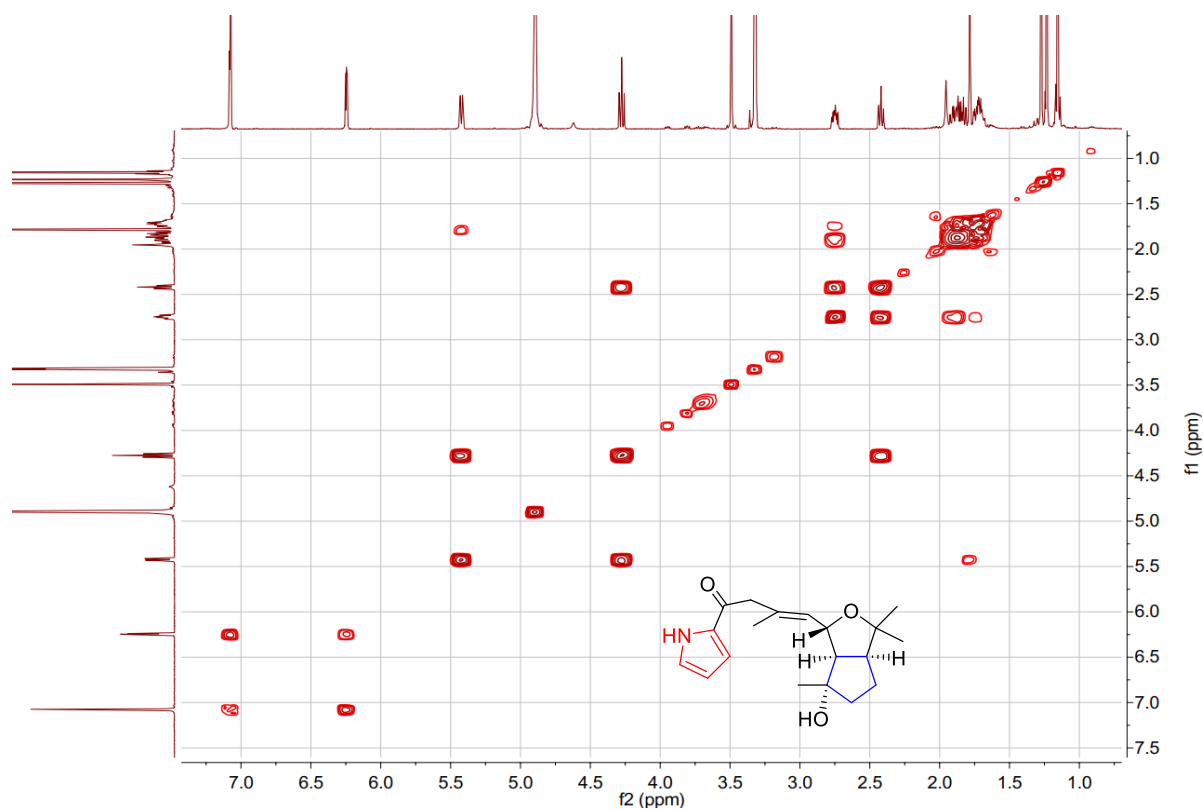

**Figure S35.**  $^1\text{H}$ - $^1\text{H}$  COSY (500 MHz) spectrum of **1** in  $\text{CD}_3\text{OD}$ .

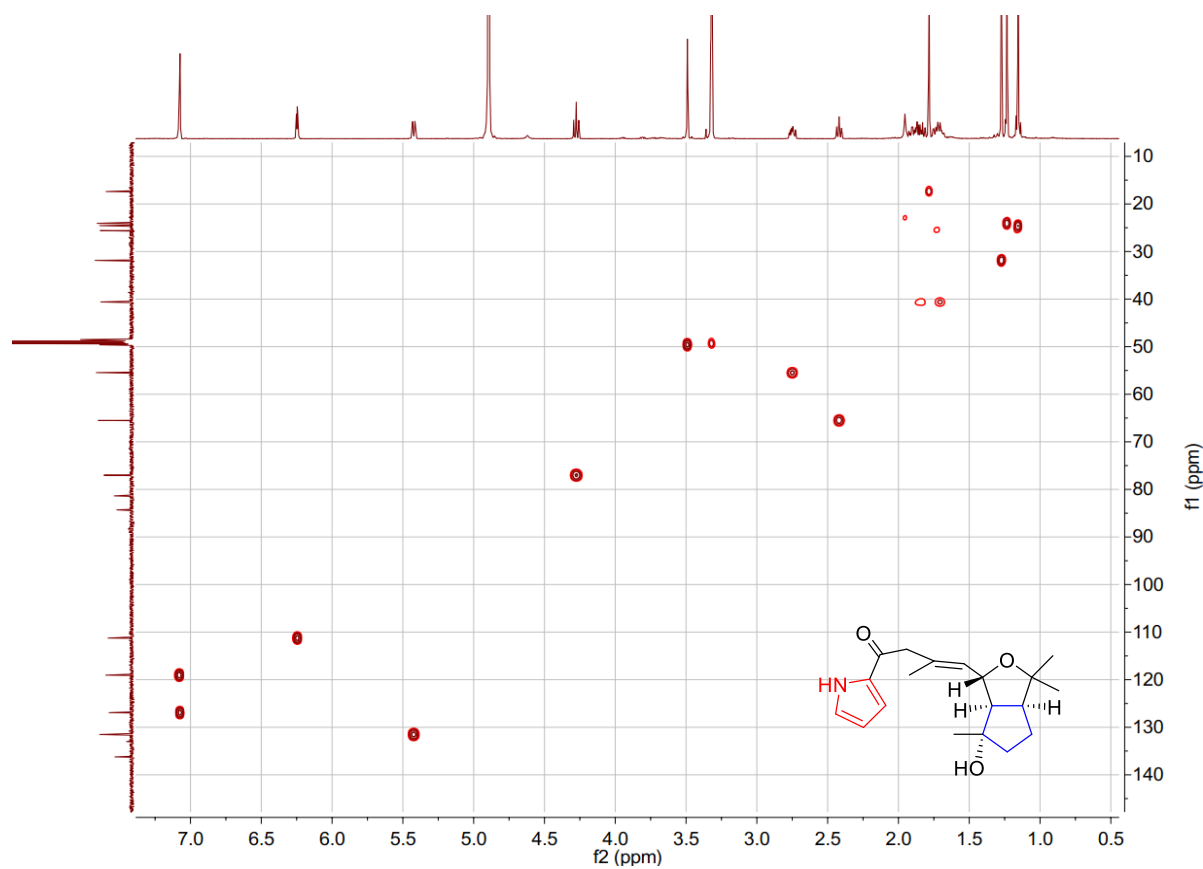

**Figure S36.** HSQC (500 MHz) spectrum of **1** in  $\text{CD}_3\text{OD}$ .

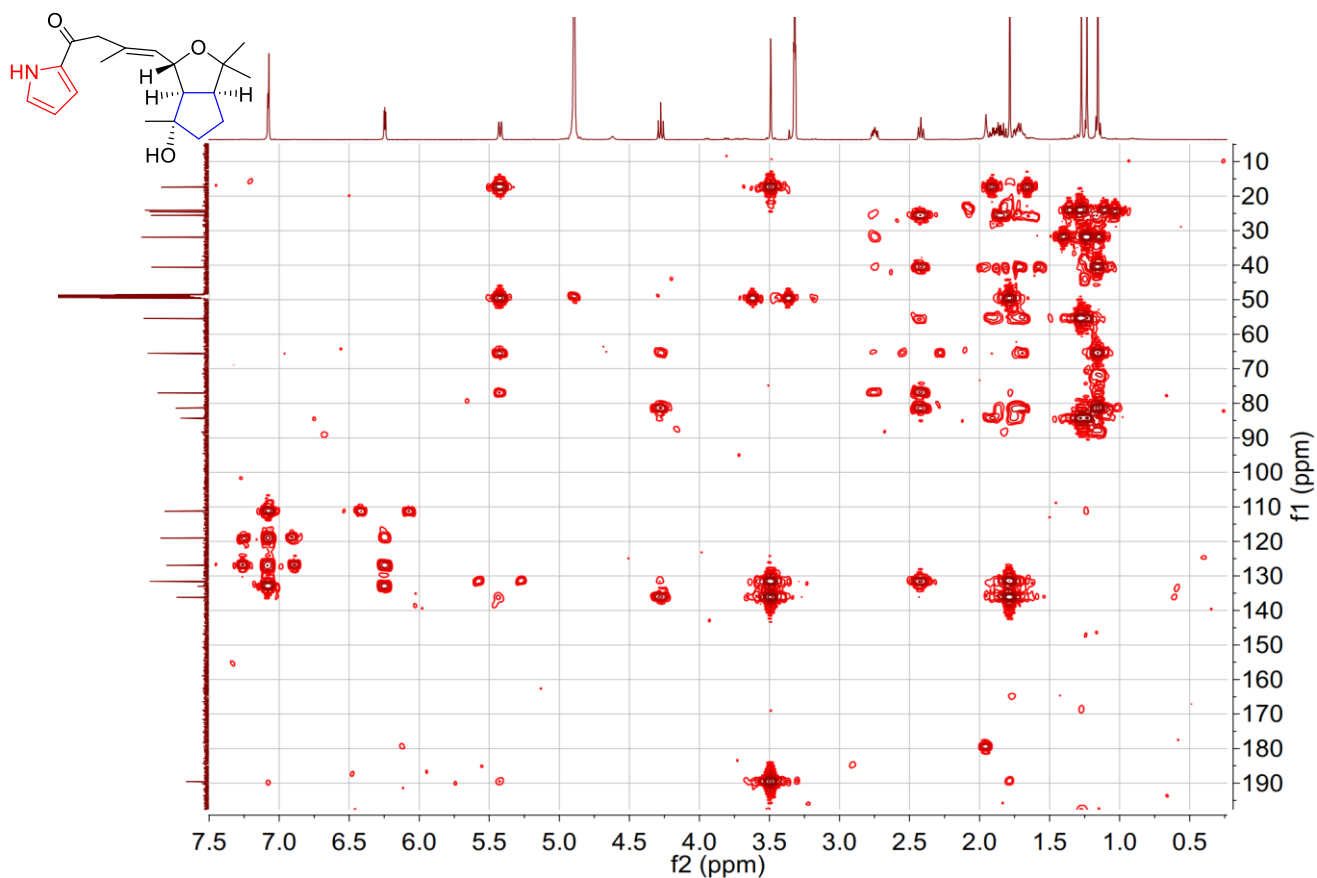

Figure S37. HMBC (500 MHz) spectrum of **1** in CD<sub>3</sub>OD.

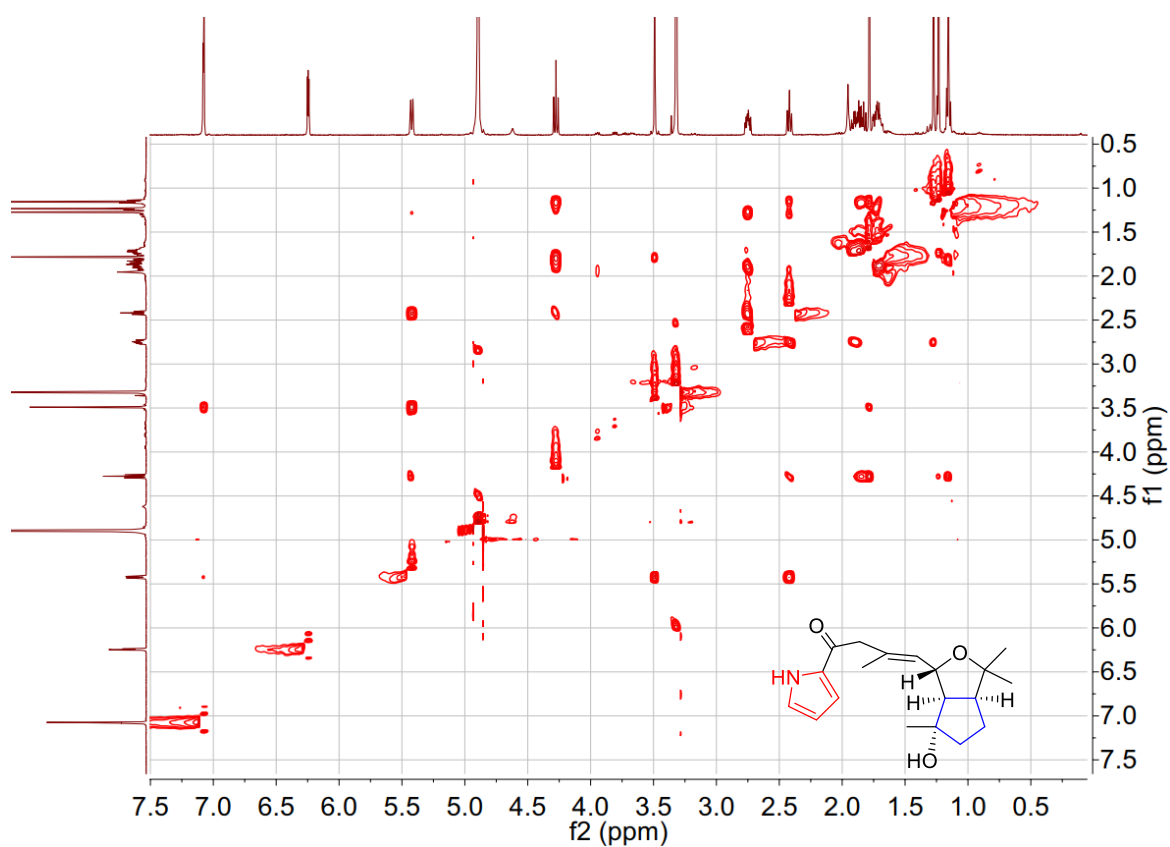

Figure S38. ROESY (500 MHz) spectrum of **1** in CD<sub>3</sub>OD.

## User Spectra

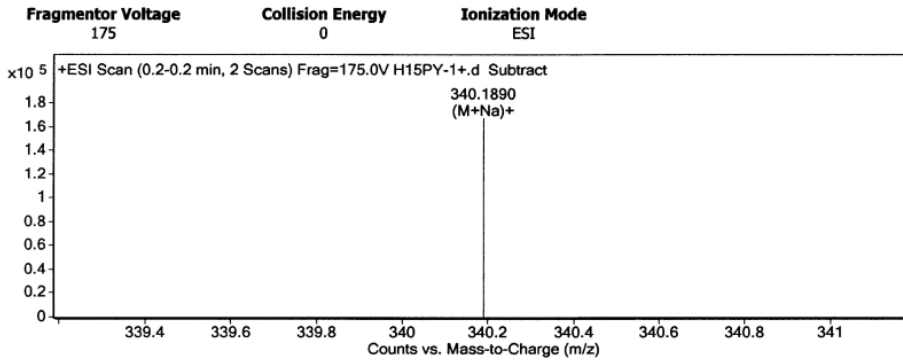

### Peak List

| m/z      | z | Abund     | Formula                                          | Ion     |
|----------|---|-----------|--------------------------------------------------|---------|
| 191.1428 | 1 | 17893.69  |                                                  |         |
| 295.1881 | 1 | 16002.43  |                                                  |         |
| 300.1959 | 1 | 78487.69  |                                                  |         |
| 318.2068 | 1 | 17811.21  |                                                  |         |
| 340.189  | 1 | 168001.72 | C <sub>19</sub> H <sub>27</sub> N O <sub>3</sub> | (M+Na)+ |
| 341.1921 | 1 | 34842.73  | C <sub>19</sub> H <sub>27</sub> N O <sub>3</sub> | (M+Na)+ |
| 356.1628 | 1 | 84831.28  |                                                  |         |
| 657.3885 | 1 | 33420.38  |                                                  |         |

### Formula Calculator Element Limits

| Element | Min | Max |
|---------|-----|-----|
| C       |     | 60  |
| H       | 0   | 120 |
| O       | 0   | 30  |
| N       | 0   | 10  |

### Formula Calculator Results

| Formula                                          | CalculatedMass | CalculatedMz | Mz       | Diff. (mDa) | Diff. (ppm) | DBE    |
|--------------------------------------------------|----------------|--------------|----------|-------------|-------------|--------|
| C <sub>19</sub> H <sub>27</sub> N O <sub>3</sub> | 317.1991       | 340.1883     | 340.1890 | -0.6        | -1.9        | 7.0000 |

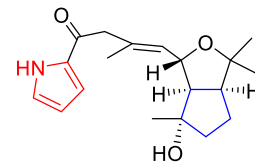

Chemical Formula: C<sub>19</sub>H<sub>27</sub>NO<sub>3</sub>  
Exact Mass: 317.1991

--- End Of Report ---

Figure S39. HR-ESI-MS spectrum of 1.

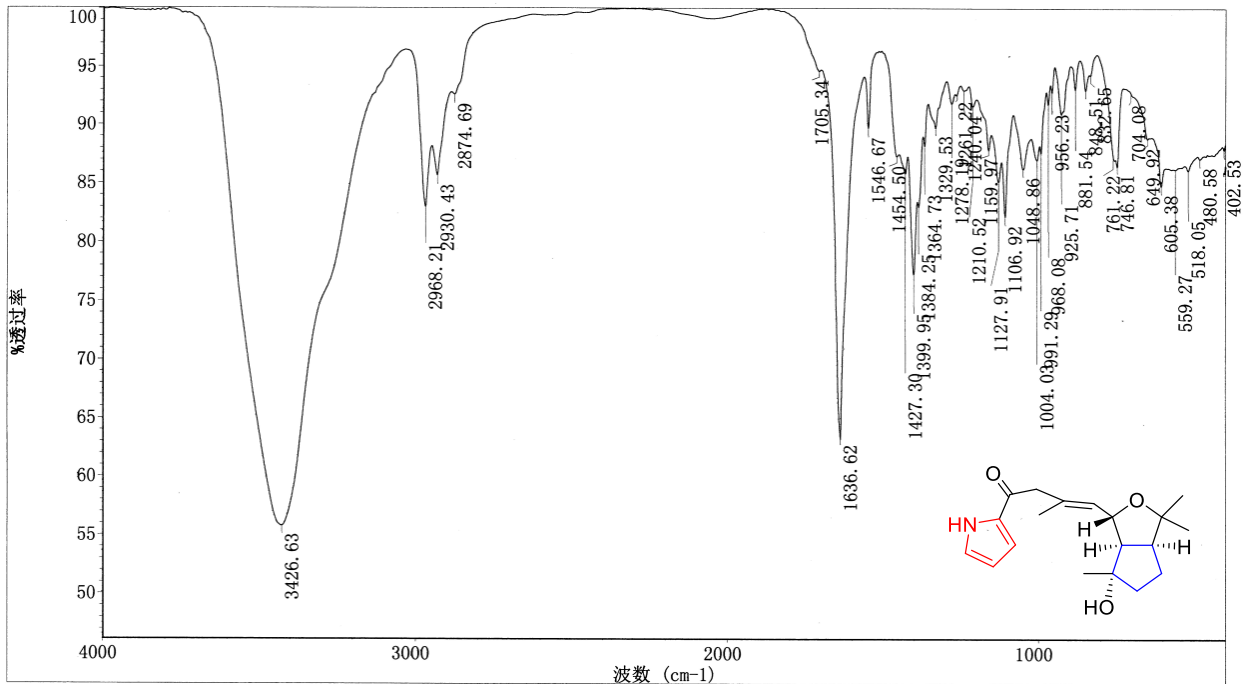

Figure S40. IR spectrum of 1.

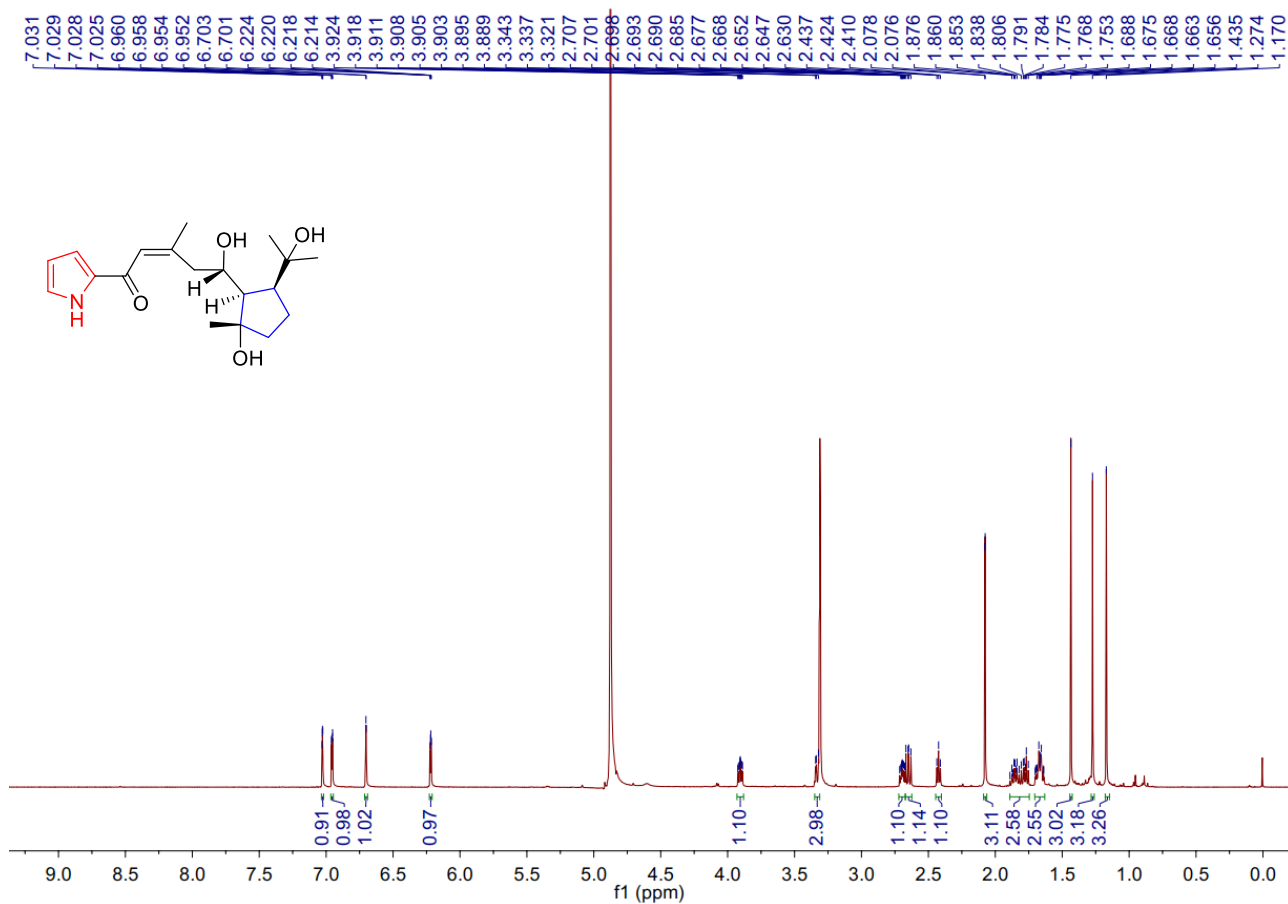

Figure S41. <sup>1</sup>H NMR (600 MHz) spectrum of **2** in CD<sub>3</sub>OD.

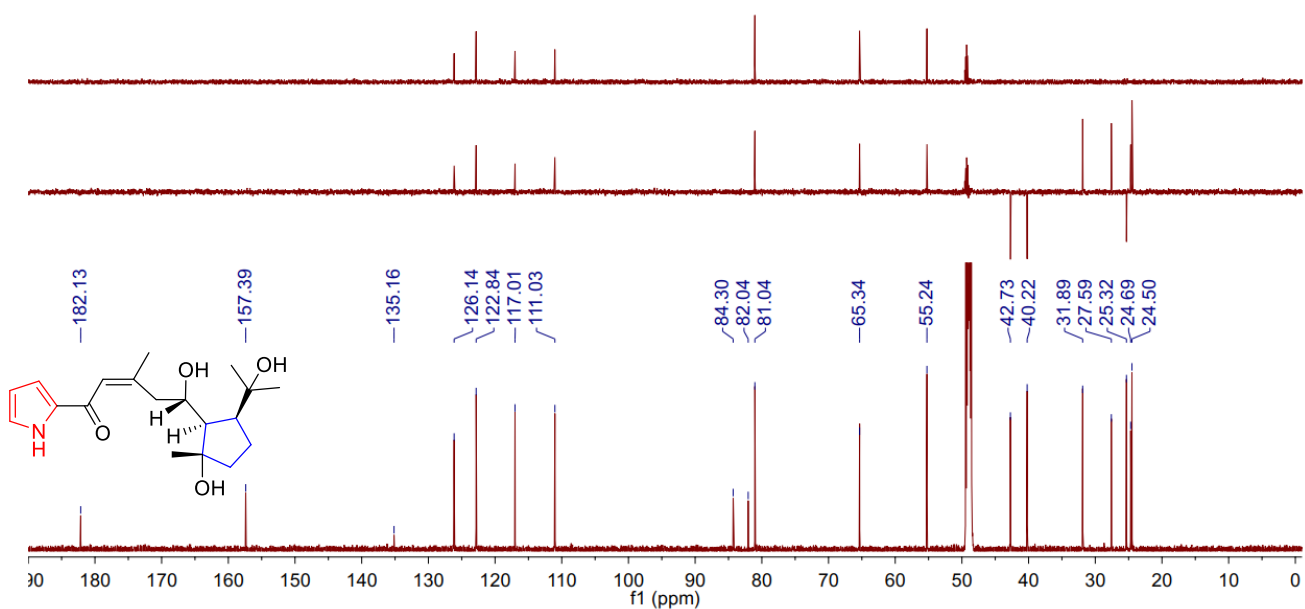

Figure S42. <sup>13</sup>C NMR (150 MHz) spectrum of **2** in CD<sub>3</sub>OD.

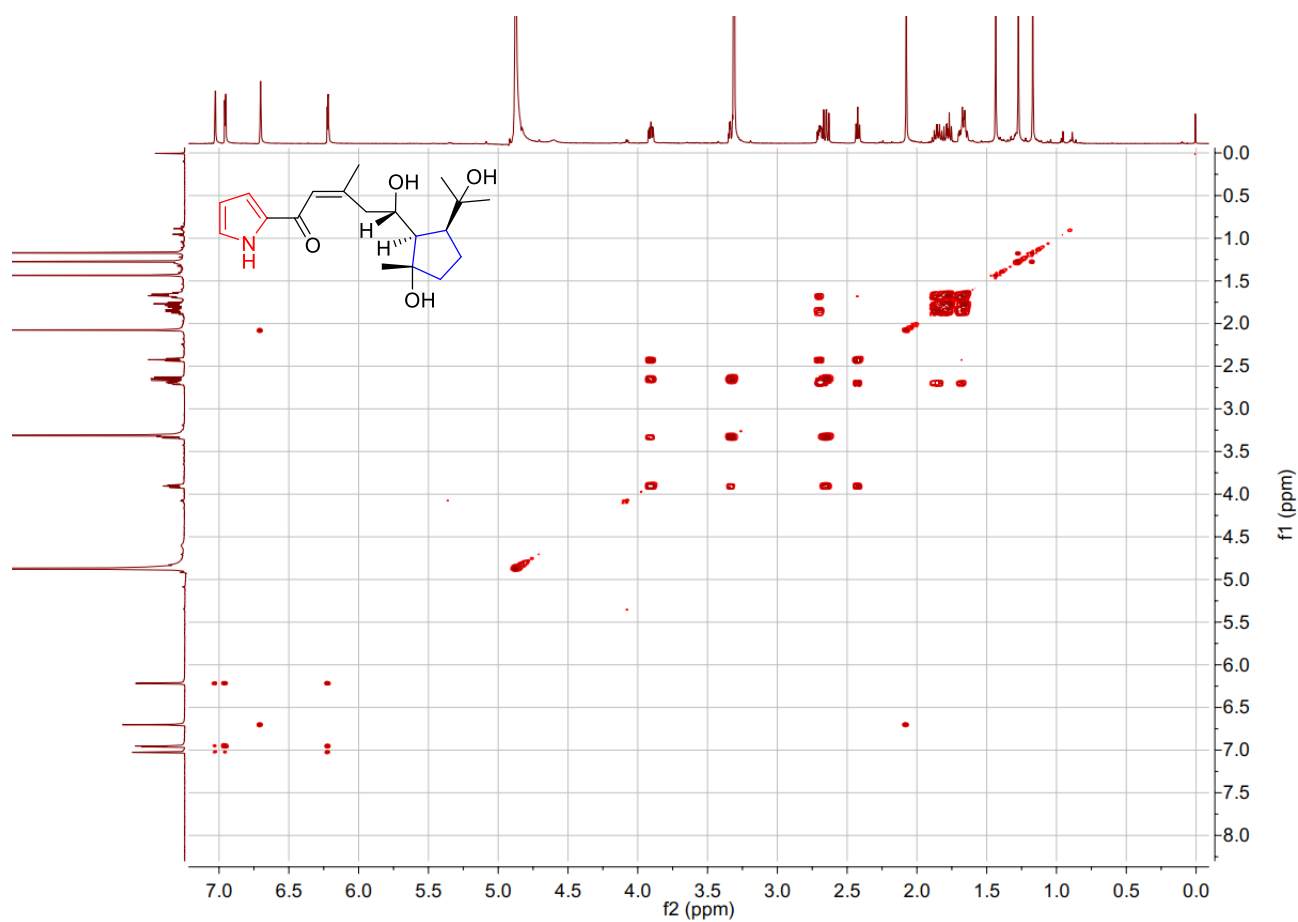

**Figure S43.**  $^1\text{H}$ - $^1\text{H}$  COSY (600 MHz) spectrum of **2** in  $\text{CD}_3\text{OD}$ .

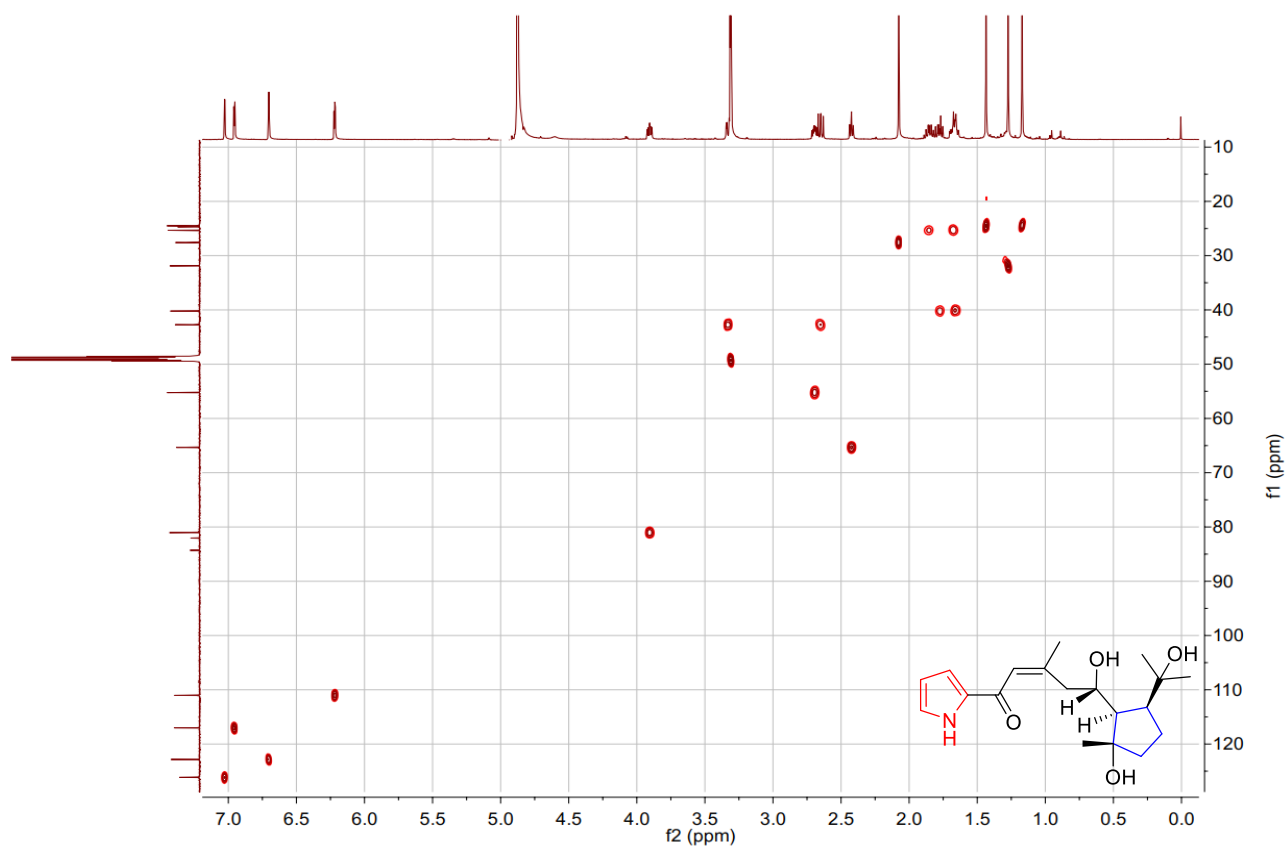

**Figure S44.** HSQC (600 MHz) spectrum of **2** in  $\text{CD}_3\text{OD}$ .

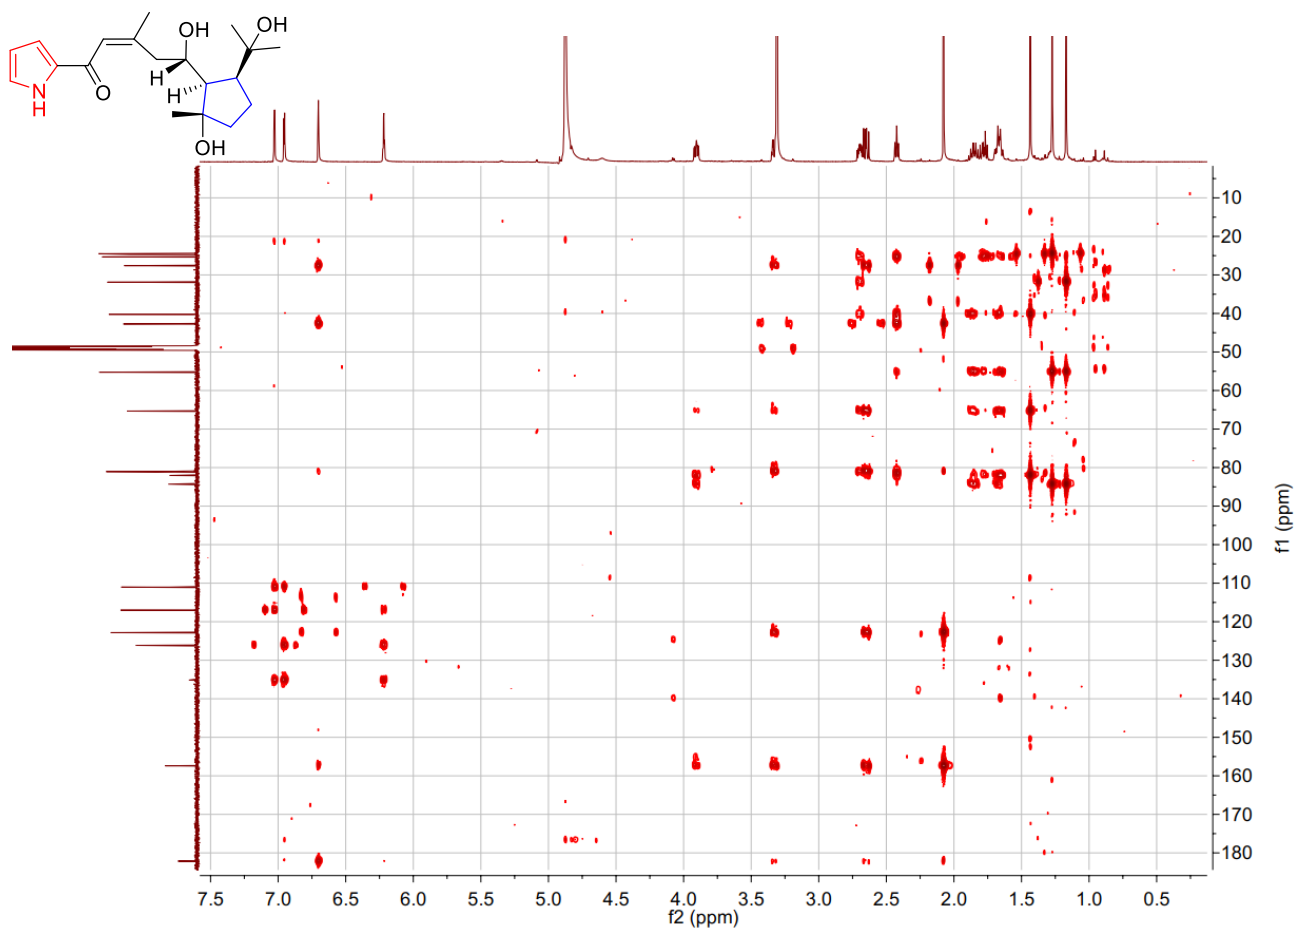

Figure S45. HMBC (600 MHz) spectrum of **2** in CD<sub>3</sub>OD.

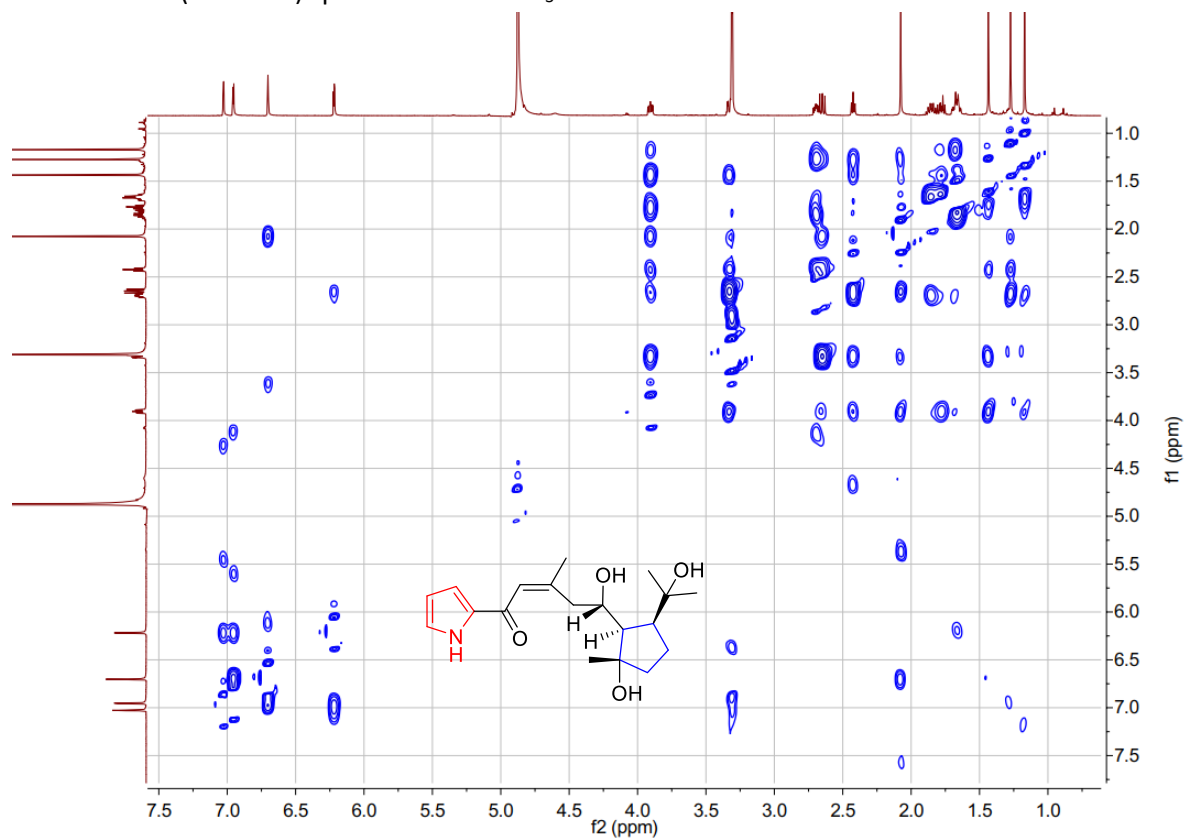

Figure S46. ROESY (600 MHz) spectrum of **2** in CD<sub>3</sub>OD.

### User Spectra

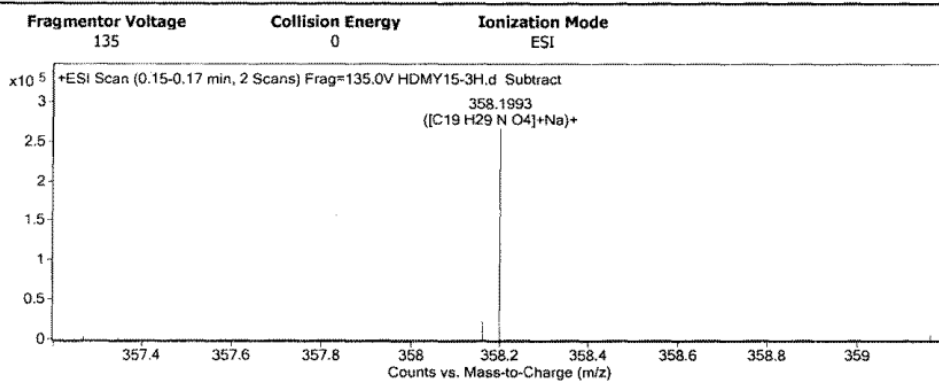

#### Peak List

| m/z       | z | Abund      |
|-----------|---|------------|
| 318.2071  | 1 | 425683     |
| 340.1883  | 1 | 650800.88  |
| 625.3714  | 1 | 1349778.13 |
| 626.3751  | 1 | 493261.75  |
| 641.3384  | 1 | 3314152    |
| 642.3414  | 1 | 1296844    |
| 647.3541  | 1 | 340833.34  |
| 657.3881  | 1 | 681894.25  |
| 1265.7023 | 1 | 445890.81  |
| 1266.7057 | 1 | 350531.94  |

#### Formula Calculator Element Limits

| Element | Min | Max |
|---------|-----|-----|
| C       | 3   | 60  |
| H       | 0   | 120 |
| O       | 0   | 30  |
| N       | 0   | 3   |

#### Formula Calculator Results

| Formula      | CalculatedMass | CalculatedMz | Mz       | Diff. (mDa) | Diff. (ppm) | DBE    |
|--------------|----------------|--------------|----------|-------------|-------------|--------|
| C19 H29 N O4 | 335.2097       | 358.1989     | 358.1993 | -0.40       | -1.12       | 6.0000 |

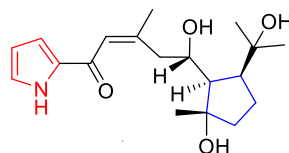

Chemical Formula: C<sub>19</sub>H<sub>29</sub>NO<sub>4</sub>  
Exact Mass: 335.2097

--- End Of Report ---

Figure S47. HR-ESI-MS spectrum of 2.

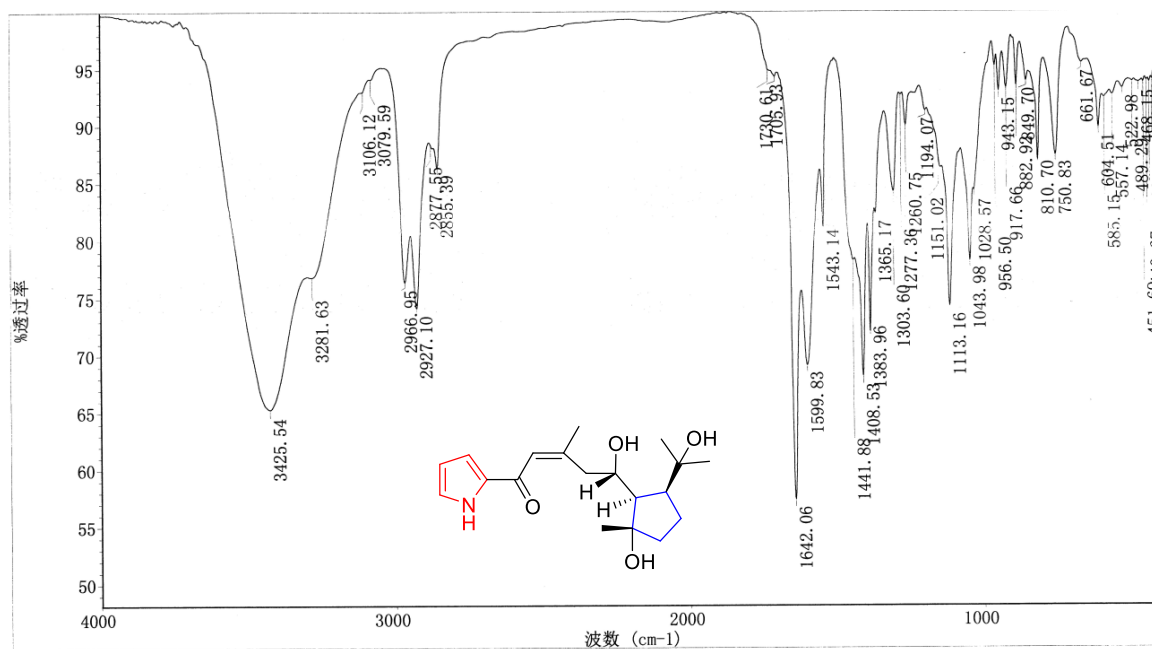

Figure S48. IR spectrum of 2.



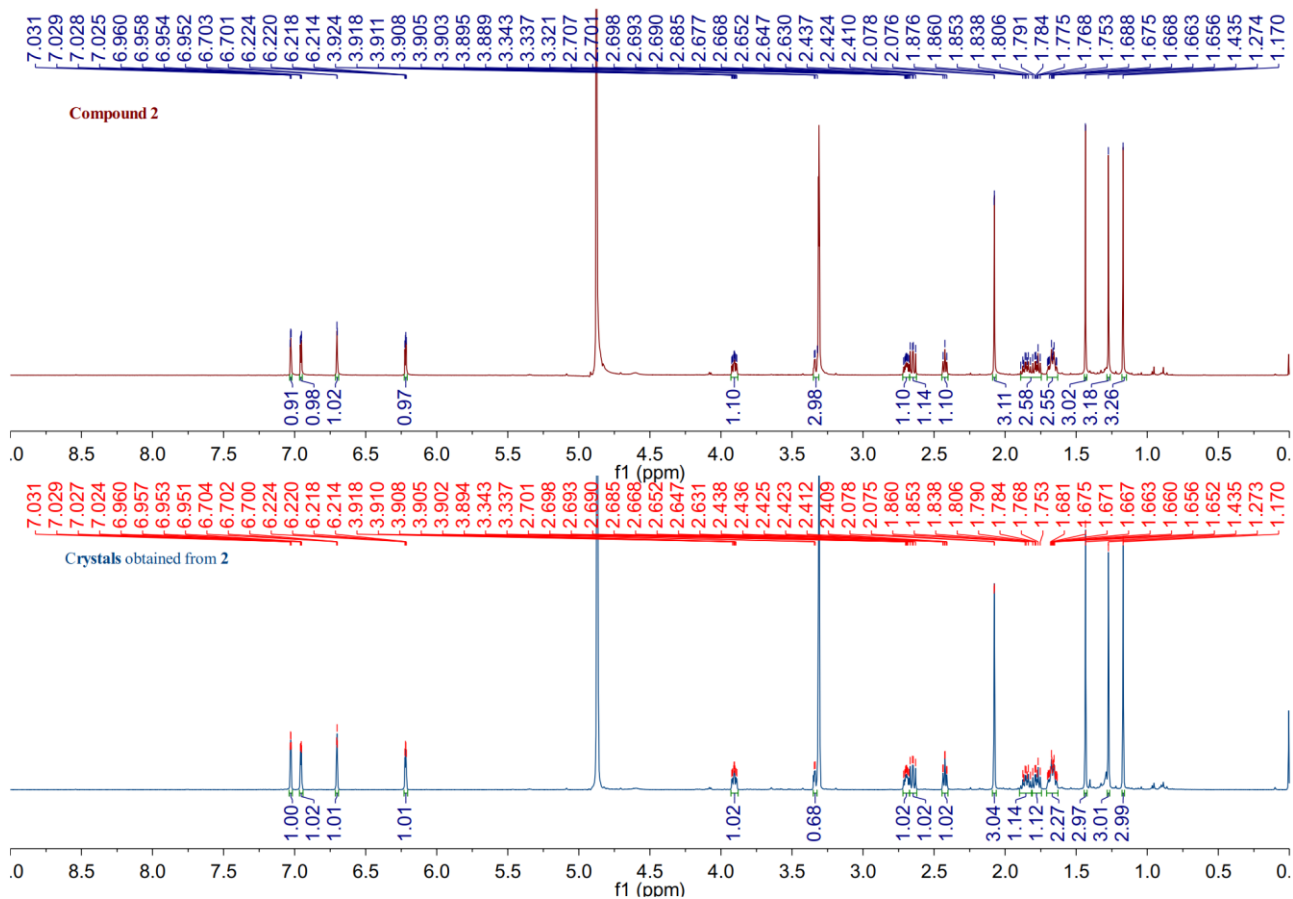

**Figure S49.**  $^1\text{H}$  NMR (600 MHz) spectrum of crystals obtained from **2**.

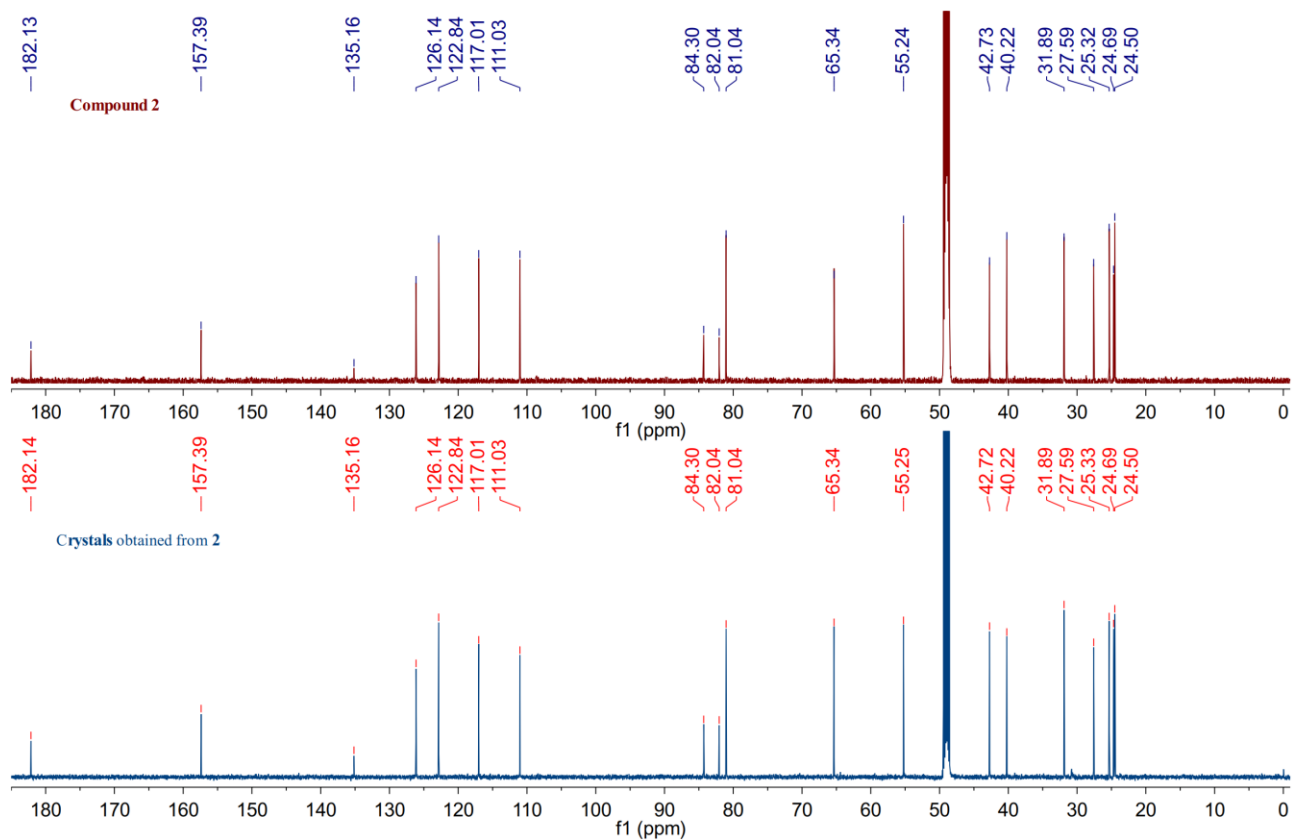

**Figure S50.**  $^{13}\text{C}$  NMR (150 MHz) spectrum of crystals obtained from **2**.

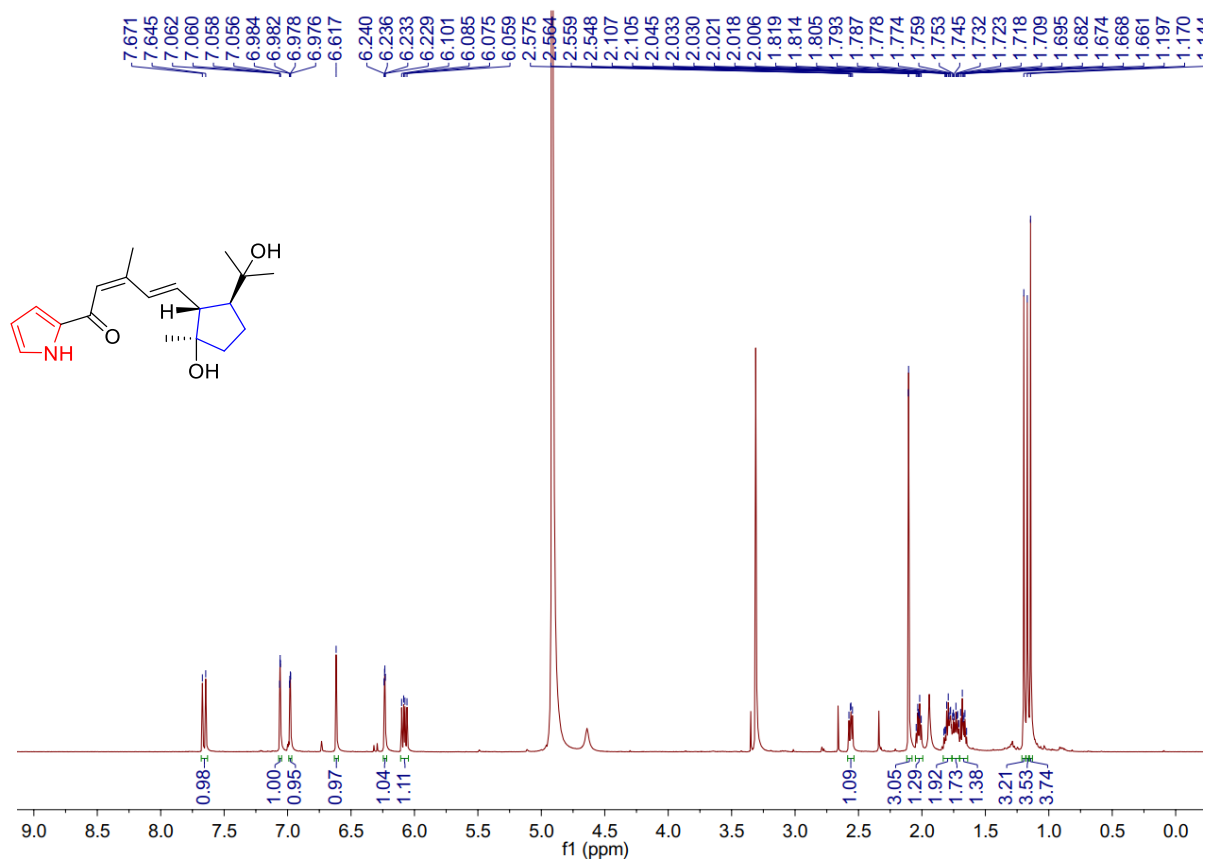

Figure S51. <sup>1</sup>H NMR (600 MHz) spectrum of **3** in CD<sub>3</sub>OD.

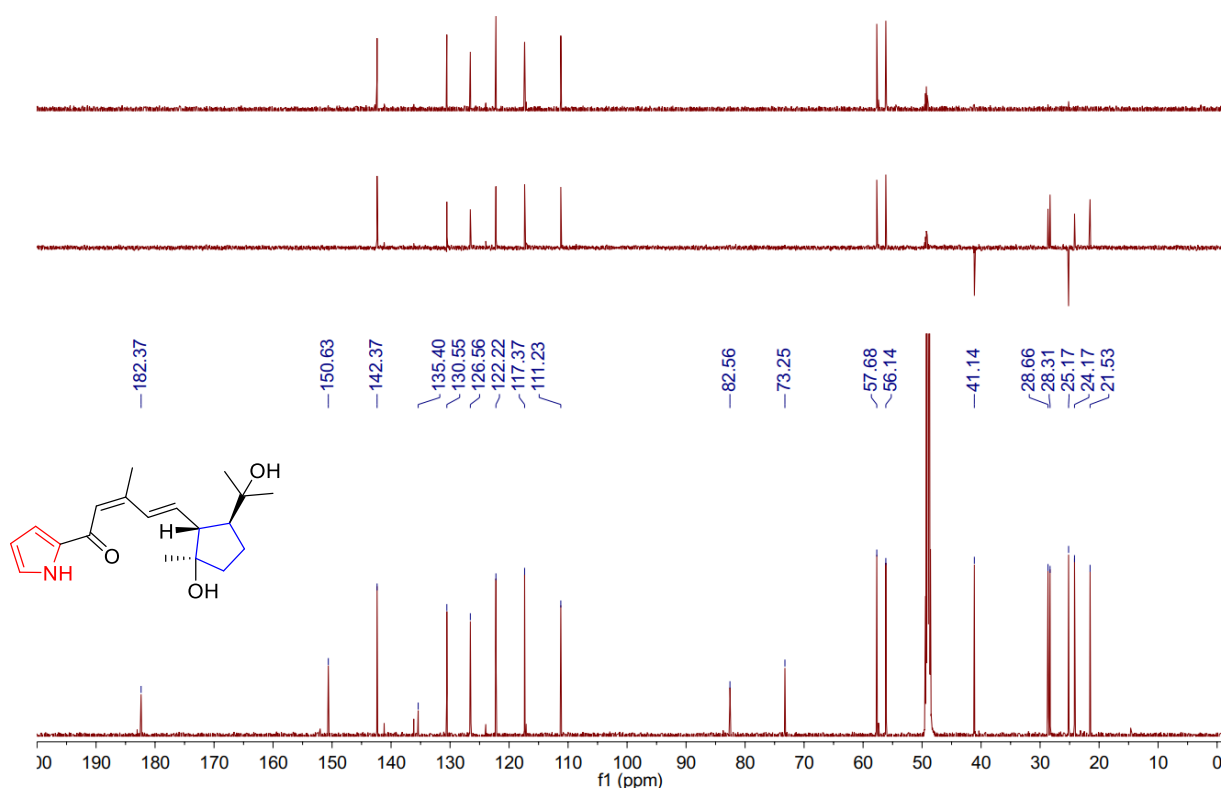

Figure S52. <sup>13</sup>C NMR (150 MHz) spectrum of **3** in CD<sub>3</sub>OD.

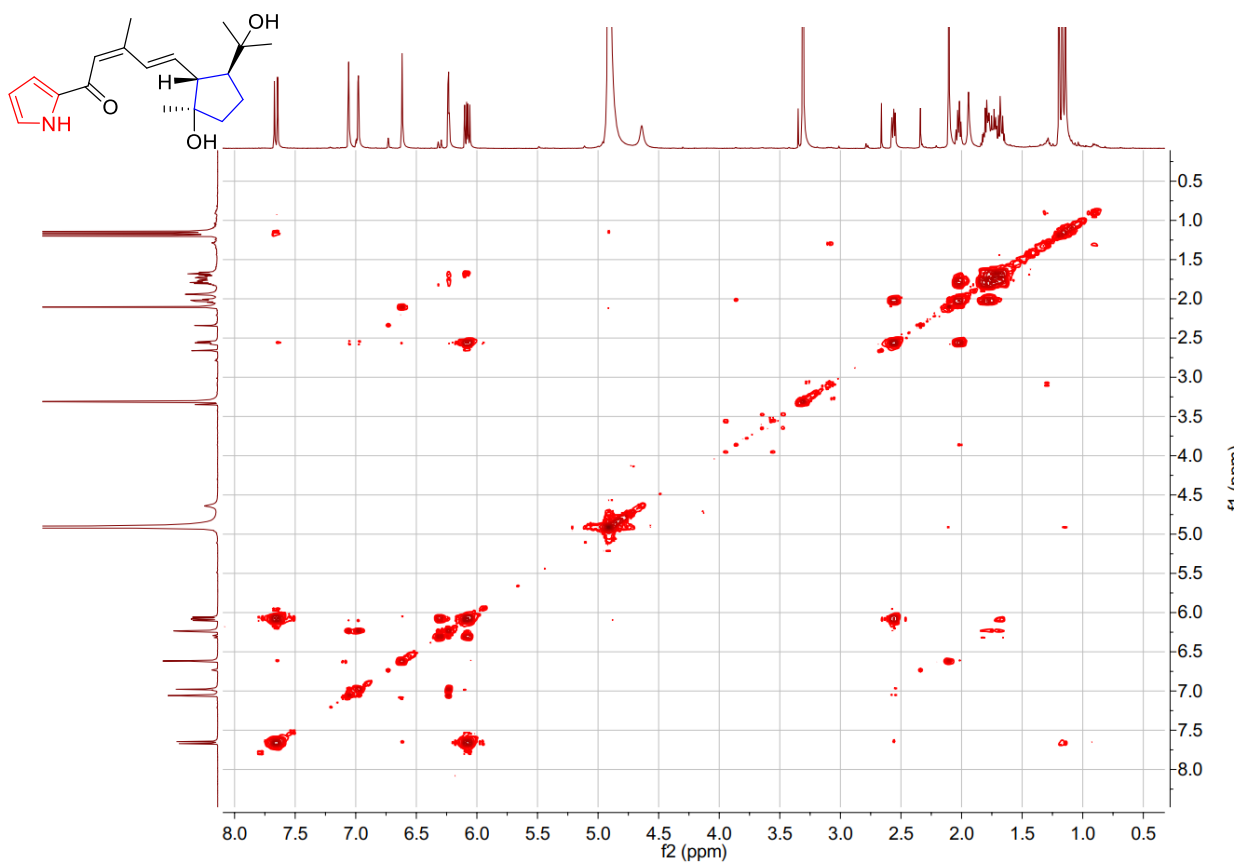

**Figure S53.**  $^1\text{H}$ - $^1\text{H}$  COSY (600 MHz) spectrum of **3** in  $\text{CD}_3\text{OD}$ .

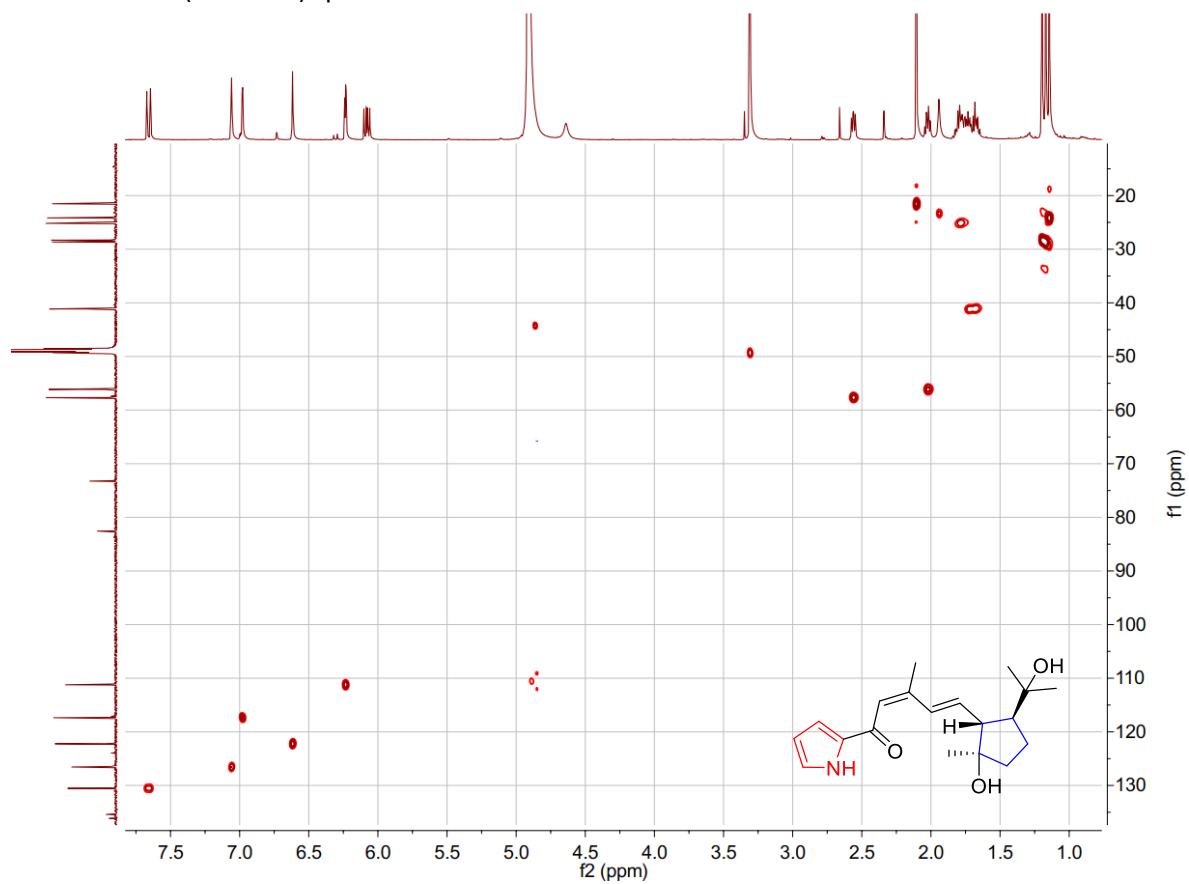

**Figure S54.** HSQC (600 MHz) spectrum of **3** in  $\text{CD}_3\text{OD}$ .

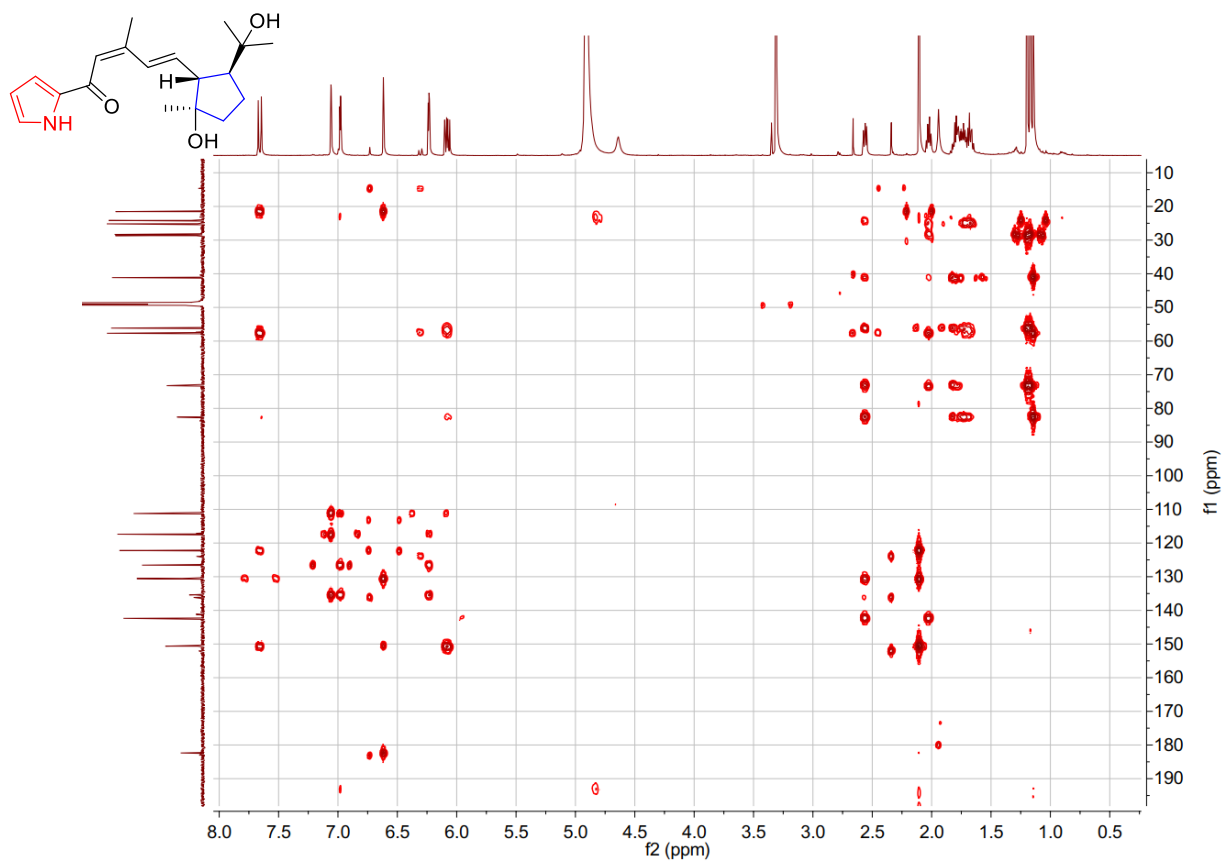

Figure S55. HMBC (600 MHz) spectrum of **3** in CD<sub>3</sub>OD.

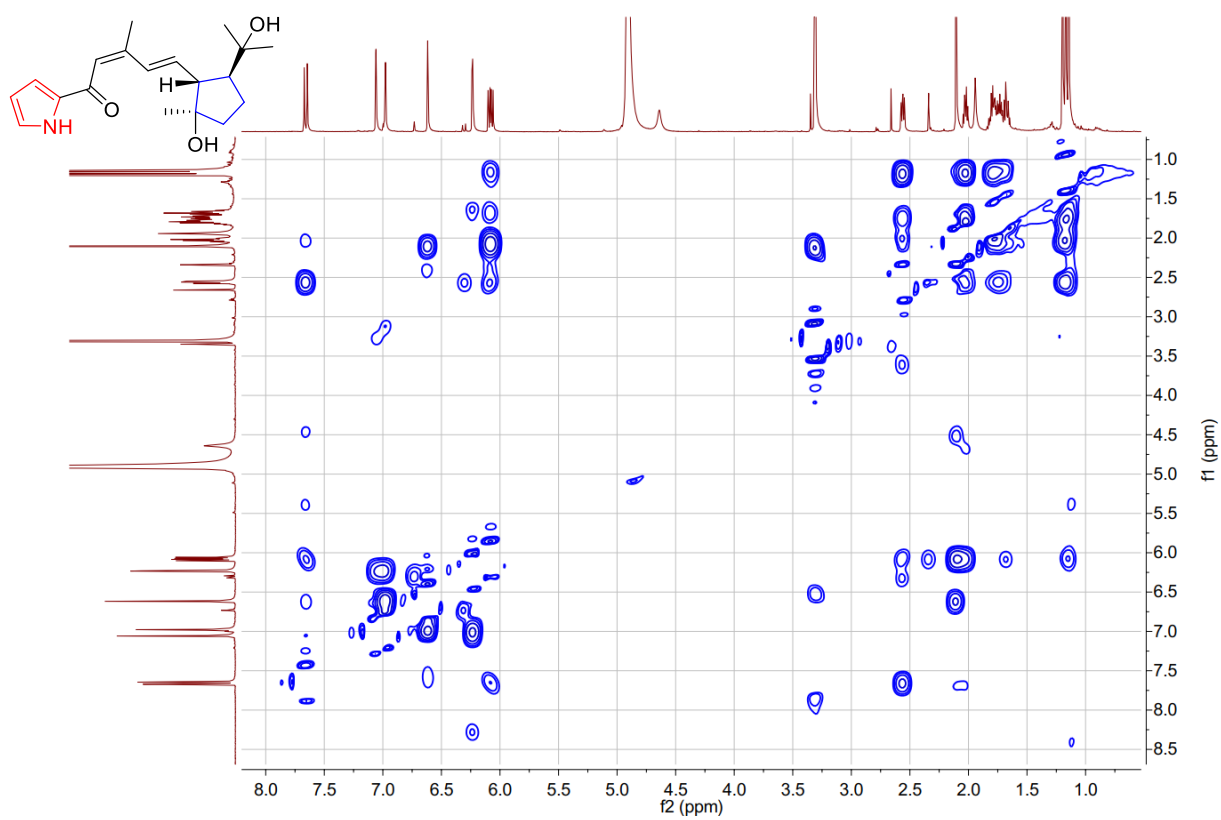

Figure S56. ROESY (600 MHz) spectrum of **3** in CD<sub>3</sub>OD.

## User Spectra

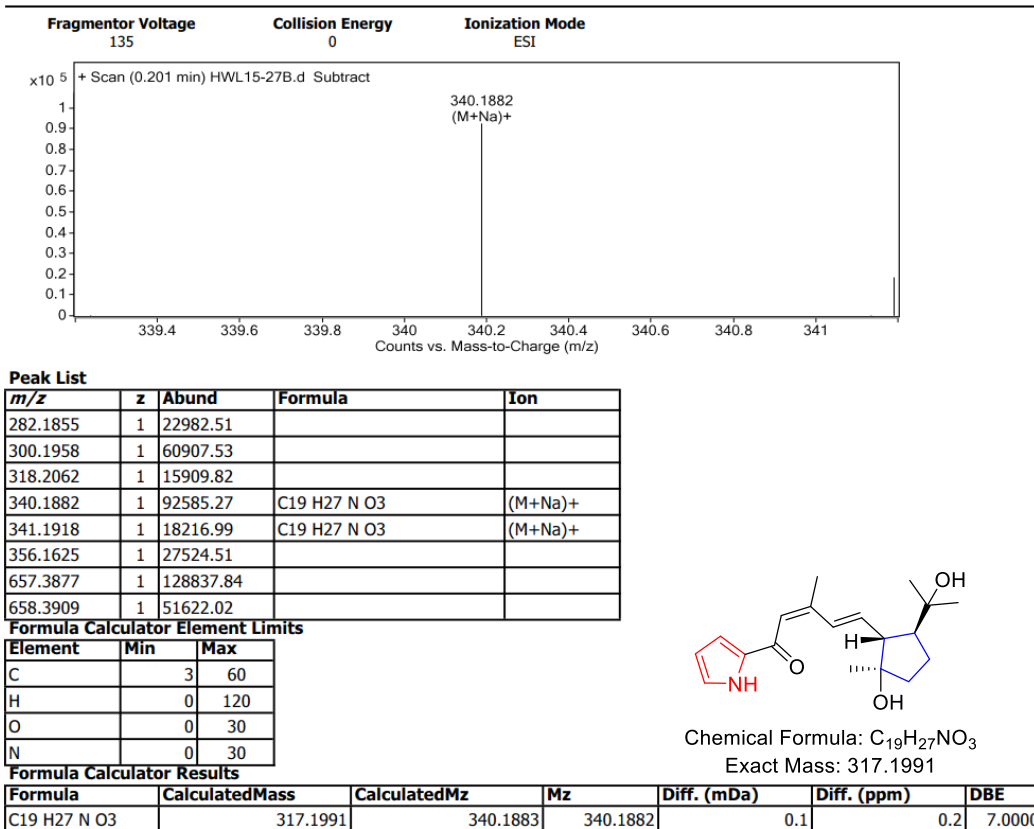

--- End Of Report ---

Figure S57. HR-ESI-MS spectrum of **3**.

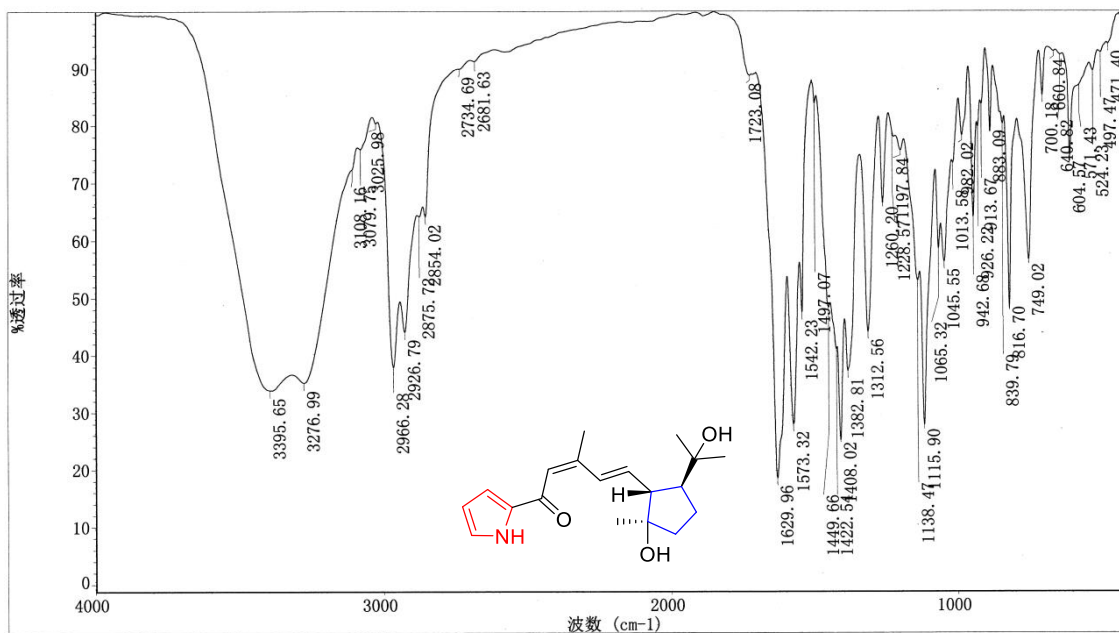

Figure S58. IR spectrum of **3**.

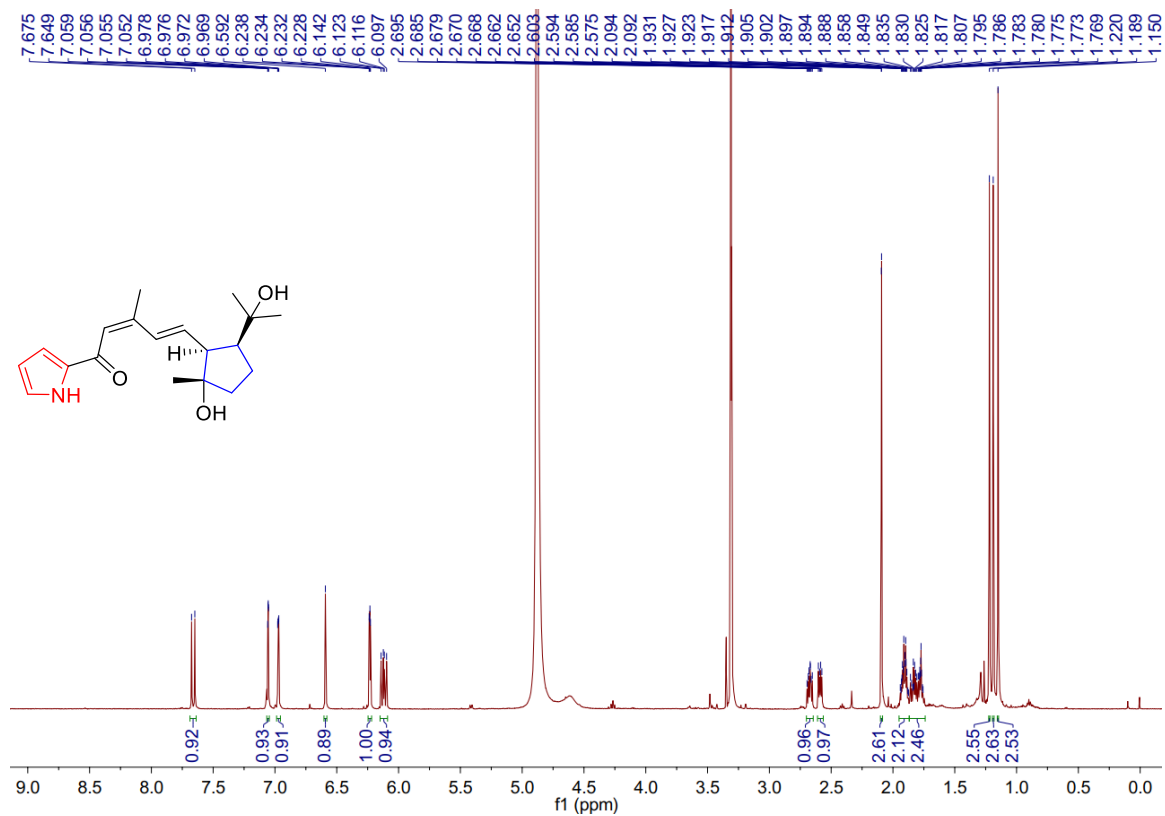

Figure S59.  $^1\text{H}$  NMR (600 MHz) spectrum of **4** in  $\text{CD}_3\text{OD}$ .

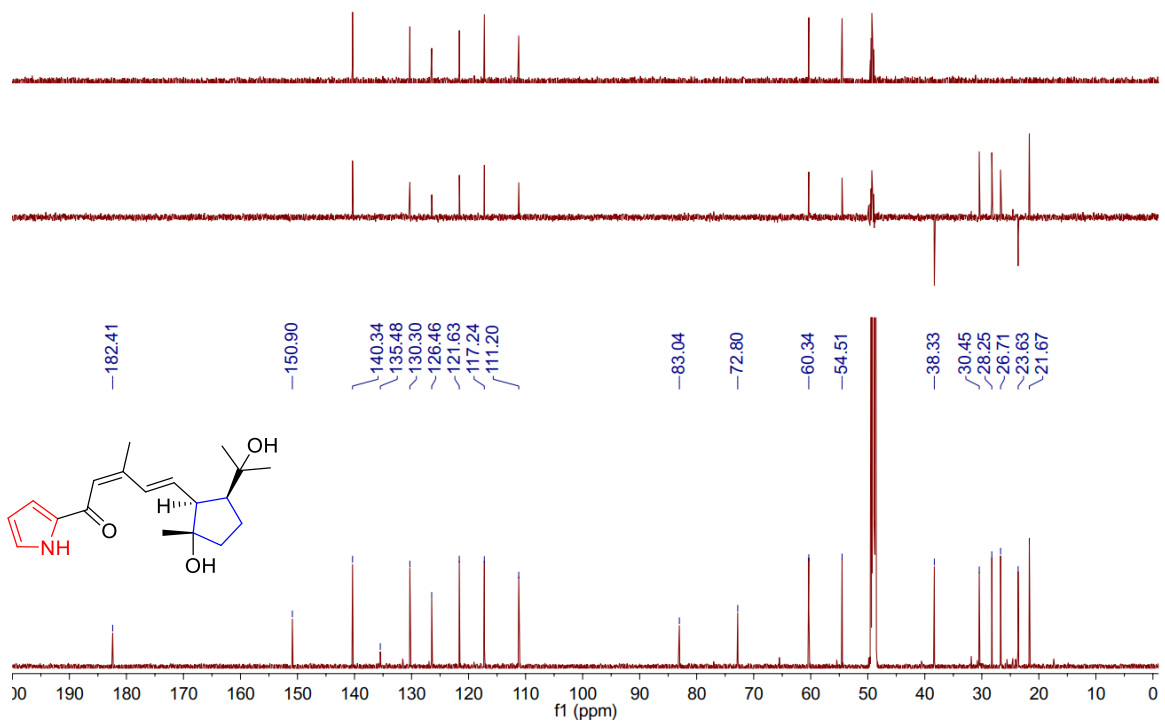

Figure S60.  $^{13}\text{C}$  NMR (150 MHz) spectrum of **4** in  $\text{CD}_3\text{OD}$ .

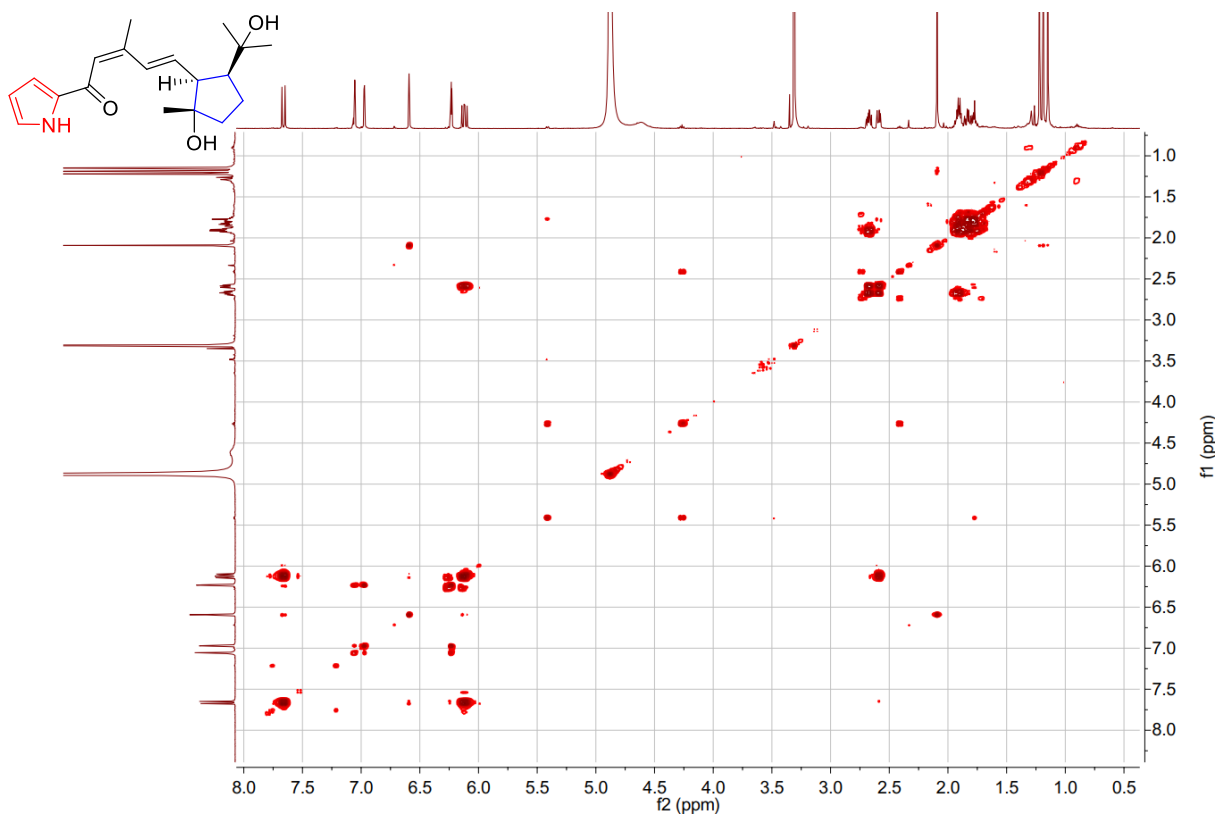

**Figure S61.**  $^1\text{H}$ - $^1\text{H}$  COSY (600 MHz) spectrum of **4** in  $\text{CD}_3\text{OD}$ .

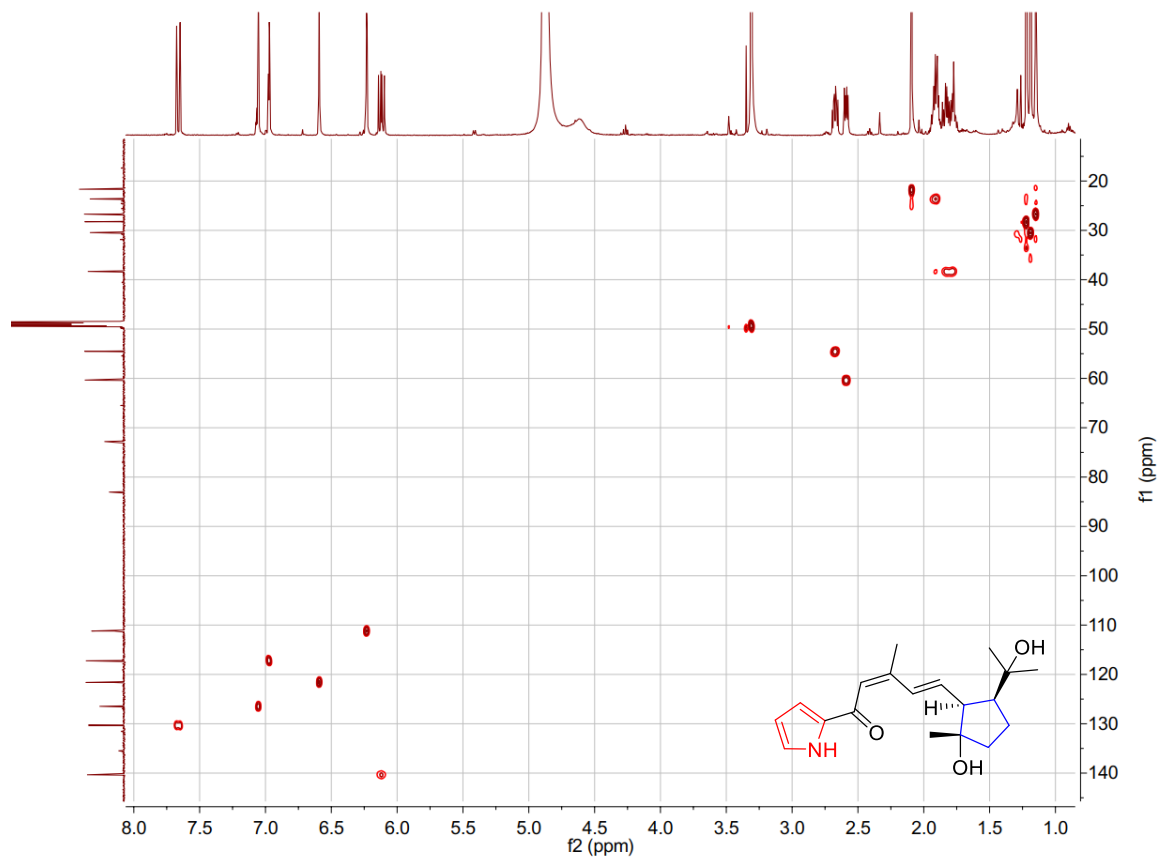

**Figure S62.** HSQC (600 MHz) spectrum of **4** in  $\text{CD}_3\text{OD}$ .

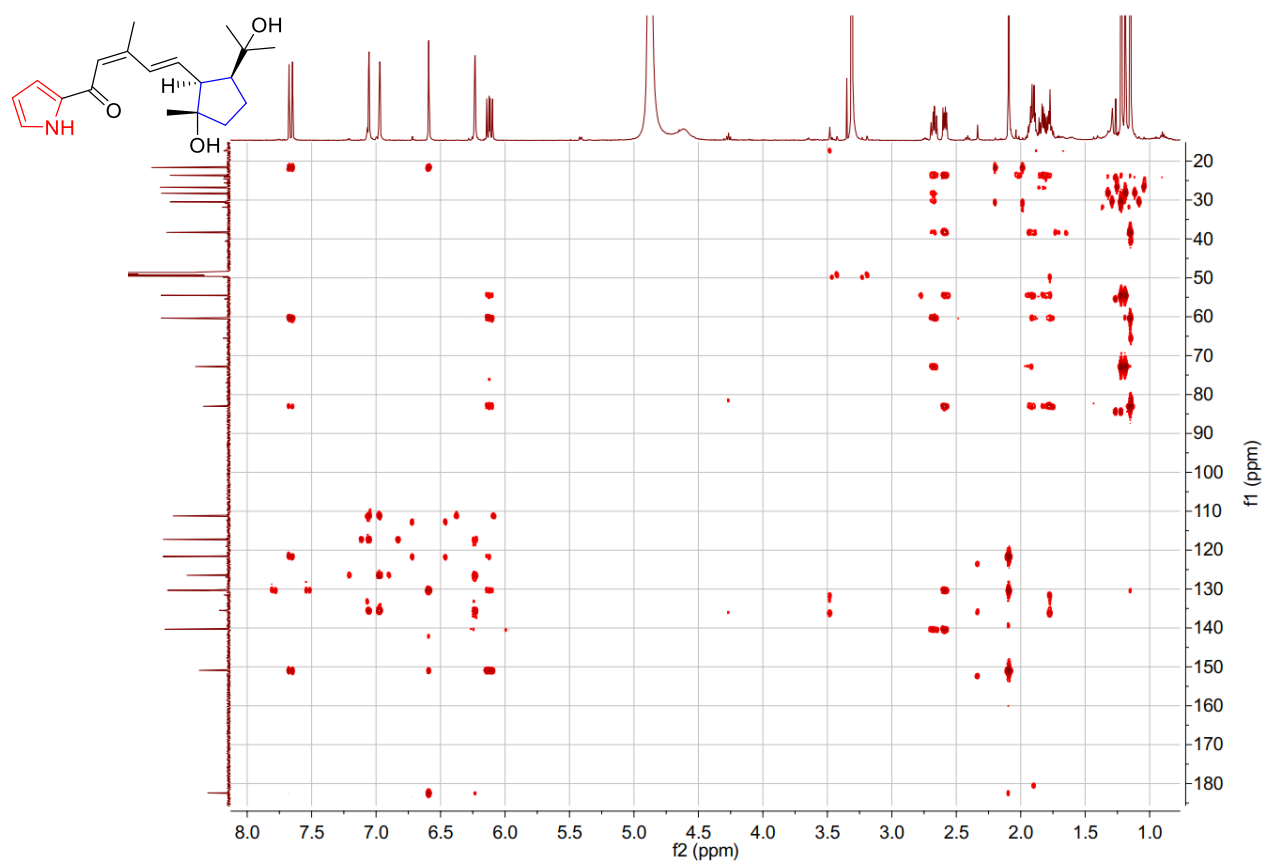

Figure S63. HMBC (600 MHz) spectrum of **4** in CD<sub>3</sub>OD.

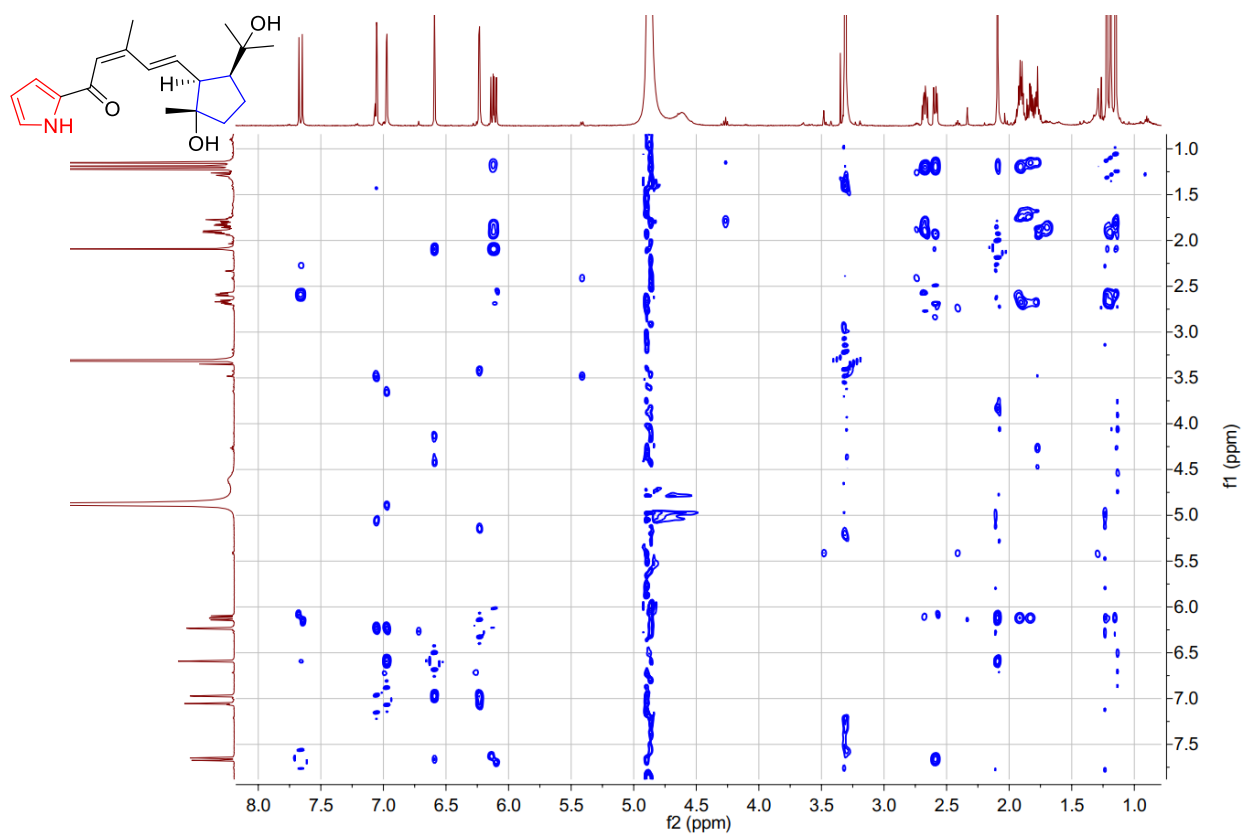

Figure S64. ROESY (600 MHz) spectrum of **4** in CD<sub>3</sub>OD.



## User Spectra

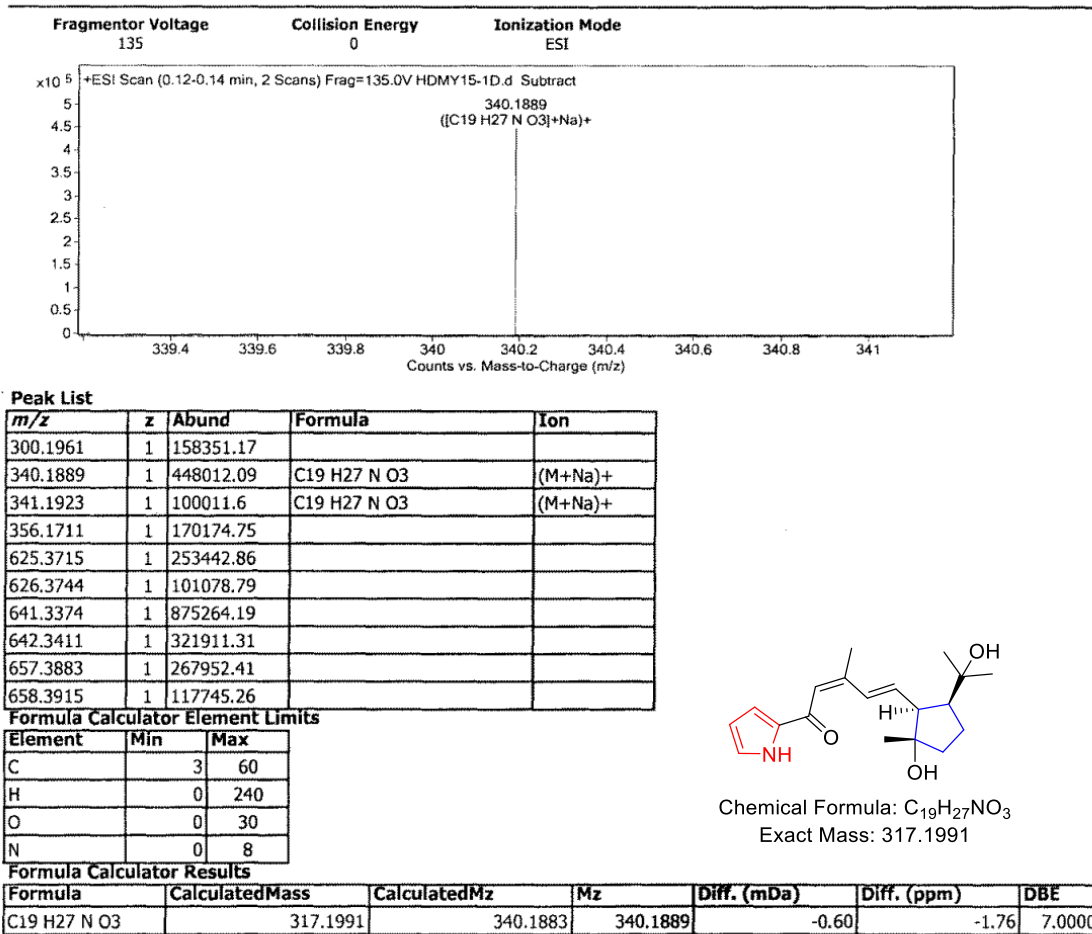

--- End Of Report ---

Figure S65. HR-ESI-MS spectrum of 4.

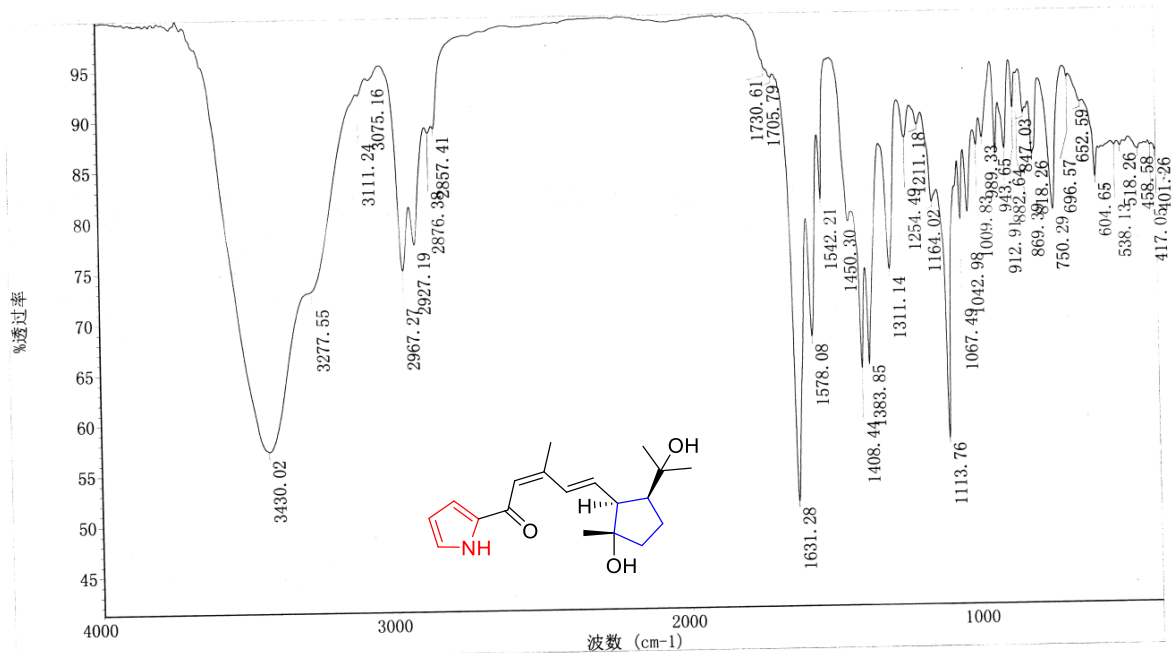

Figure S66. IR spectrum of 4.

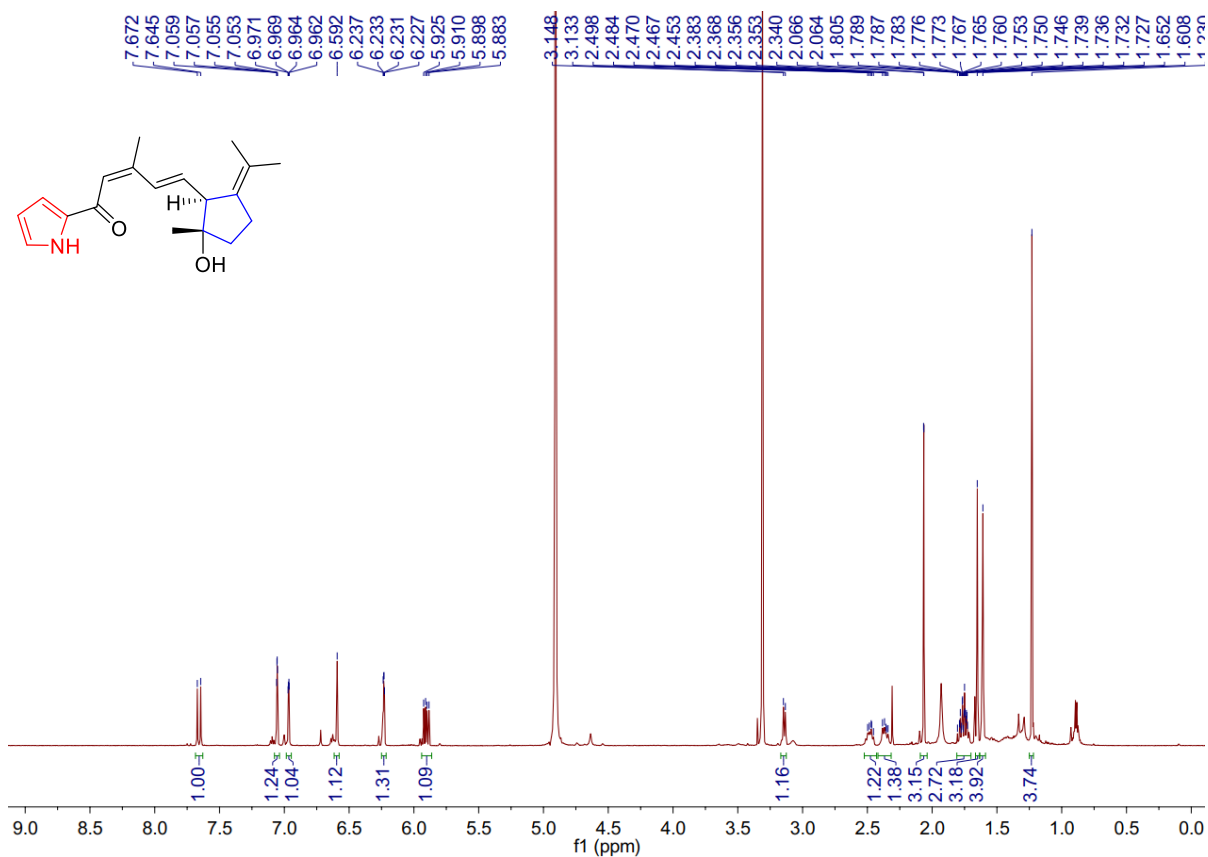

Figure S67. <sup>1</sup>H NMR (600 MHz) spectrum of 5 in CD<sub>3</sub>OD.

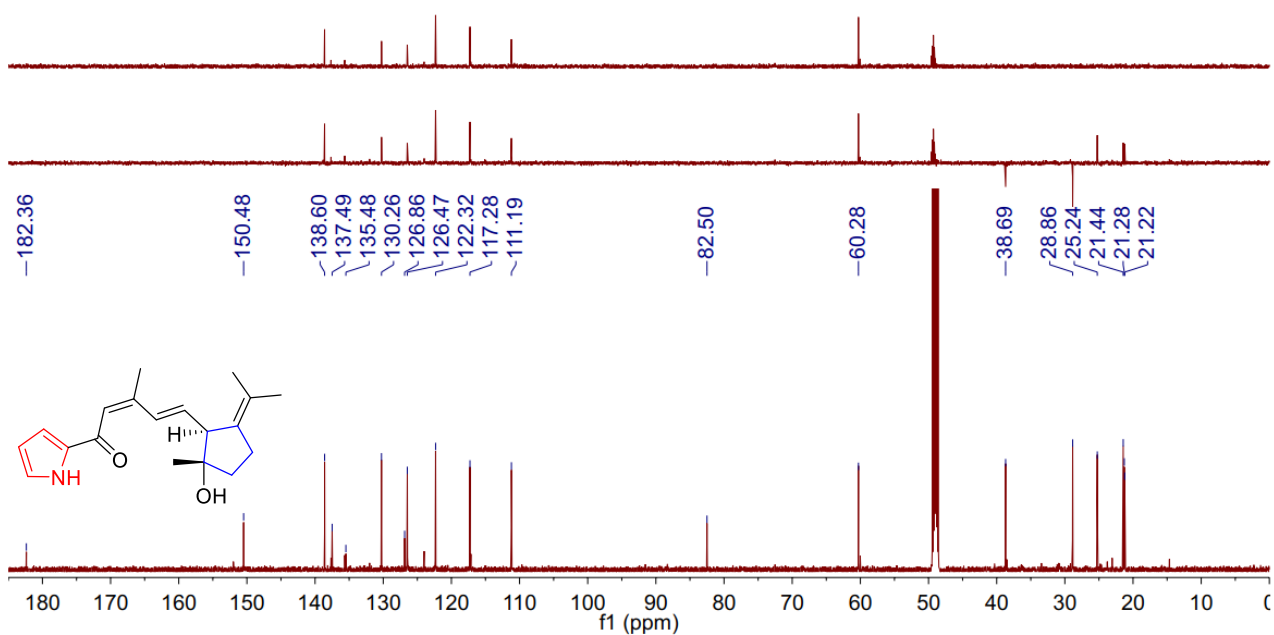

Figure S68. <sup>13</sup>C NMR (150 MHz) spectrum of 5 in CD<sub>3</sub>OD.

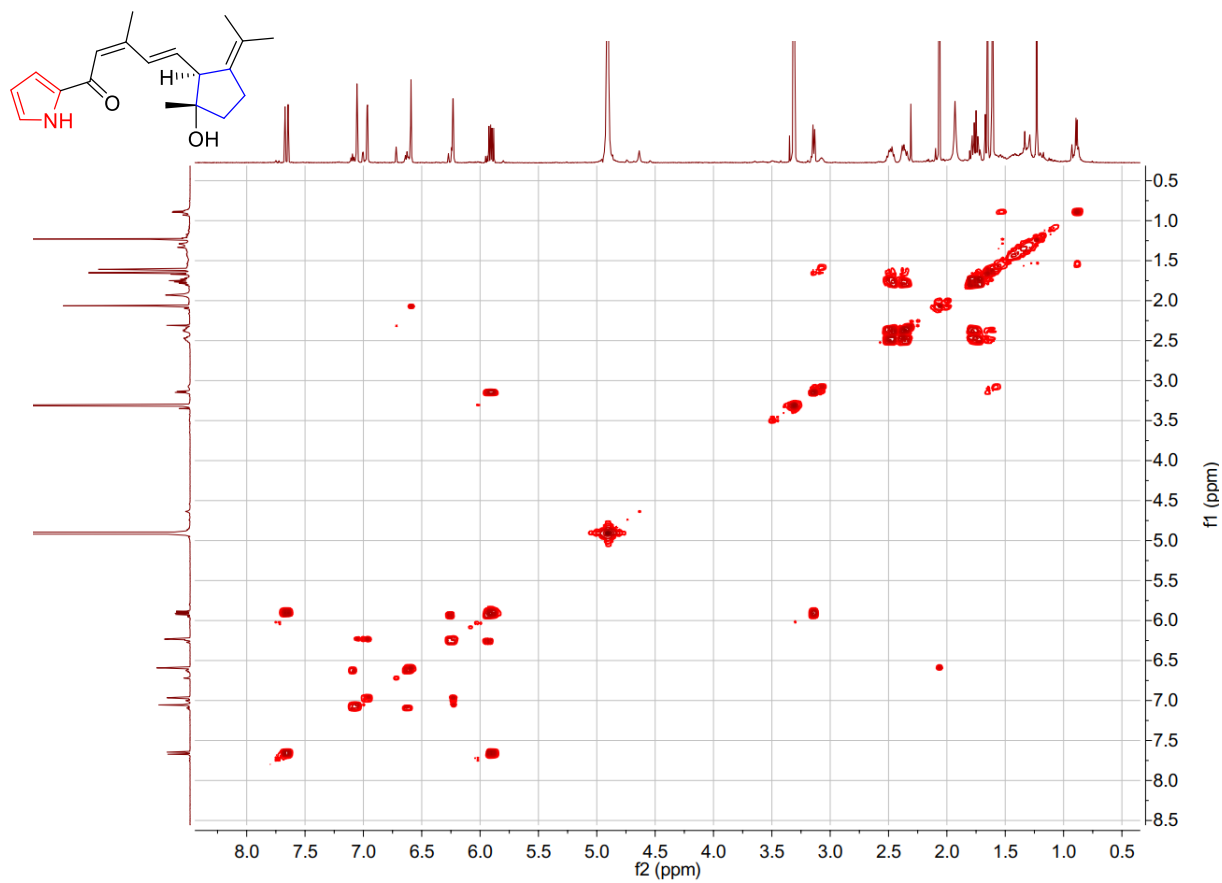

**Figure S69.**  $^1\text{H}$ - $^1\text{H}$  COSY (600 MHz) spectrum of **5** in  $\text{CD}_3\text{OD}$ .

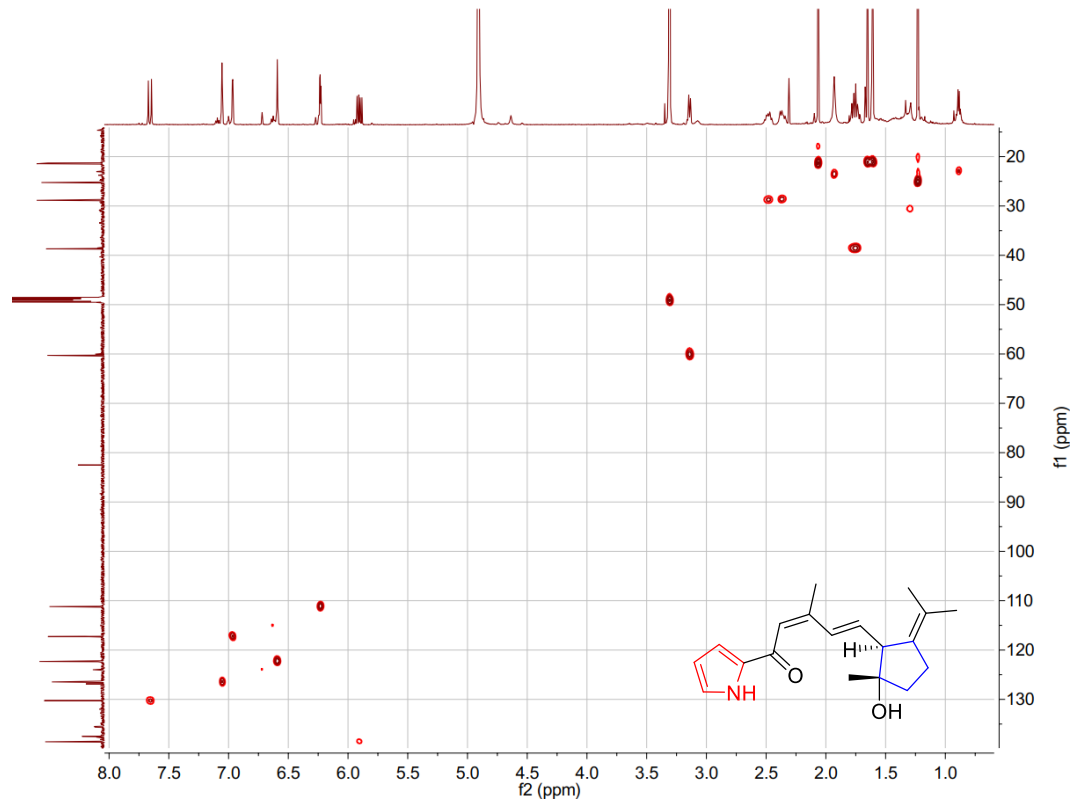

**Figure S70.** HSQC (600 MHz) spectrum of **5** in  $\text{CD}_3\text{OD}$ .

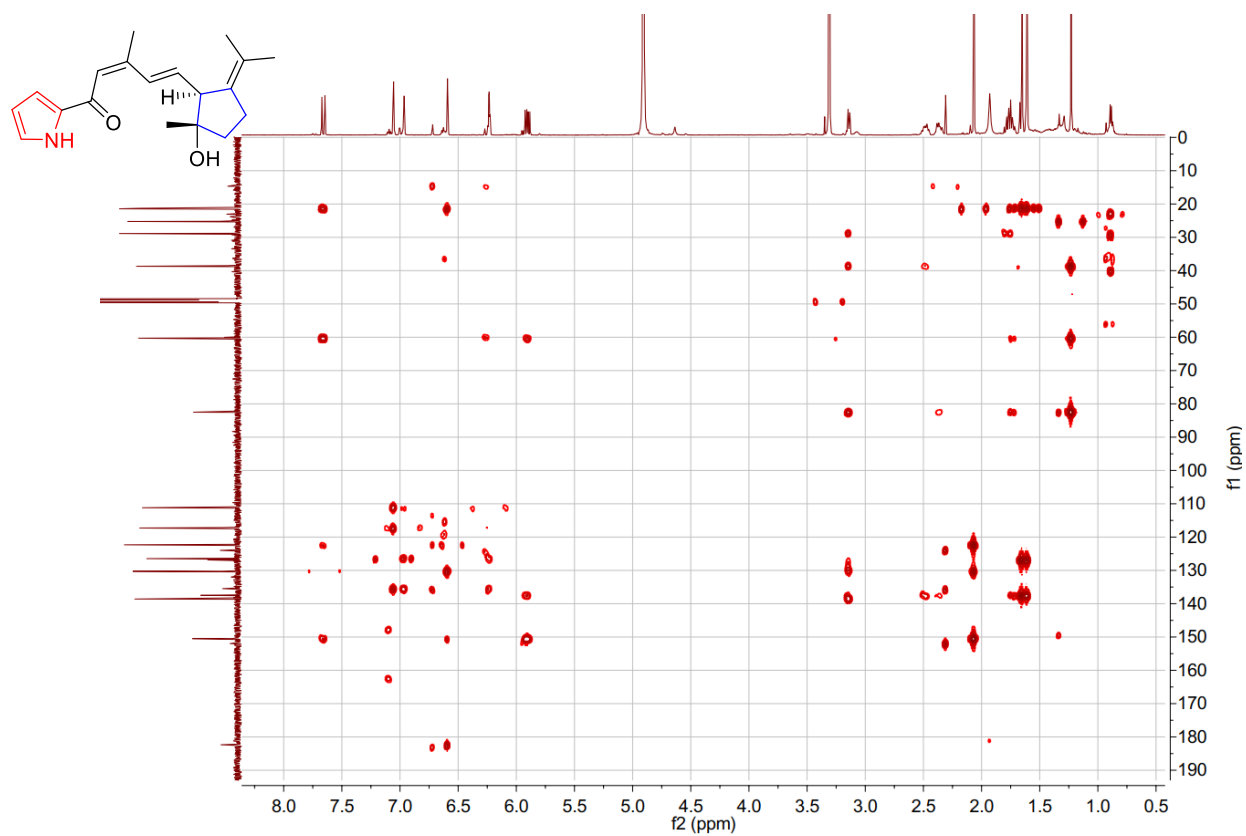

Figure S71. HMBC (600 MHz) spectrum of **5** in CD<sub>3</sub>OD.

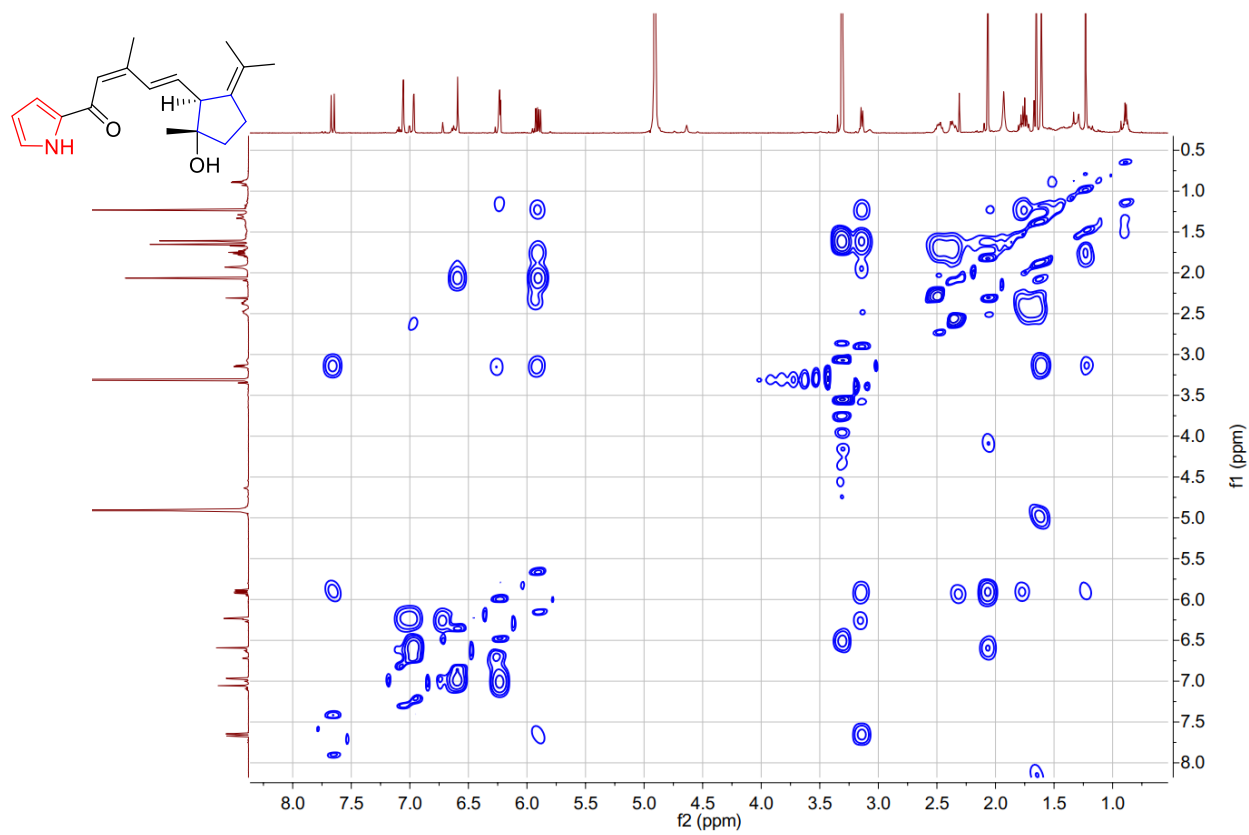

Figure S72. ROESY (600 MHz) spectrum of **5** in CD<sub>3</sub>OD.

### User Spectra

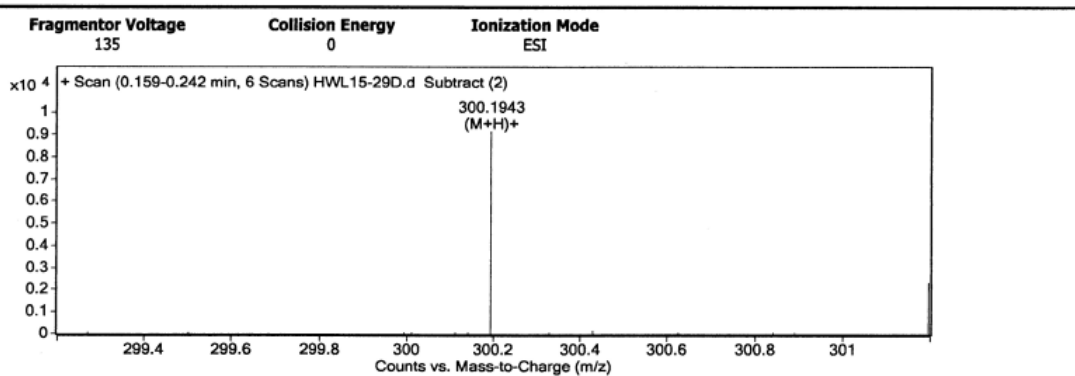

#### Peak List

| m/z      | z | Abund   | Formula                                          | Ion                |
|----------|---|---------|--------------------------------------------------|--------------------|
| 282.1833 | 1 | 2405.23 |                                                  |                    |
| 298.1788 |   | 2031.8  |                                                  |                    |
| 300.1943 | 1 | 9175.46 | C <sub>19</sub> H <sub>25</sub> N O <sub>2</sub> | (M+H) <sup>+</sup> |
| 301.198  | 1 | 2328.94 | C <sub>19</sub> H <sub>25</sub> N O <sub>2</sub> | (M+H) <sup>+</sup> |
| 322.1763 | 1 | 5139.96 |                                                  |                    |
| 338.1513 | 1 | 2242.26 |                                                  |                    |
| 338.1695 | 1 | 2392.76 |                                                  |                    |
| 354.1587 | 1 | 2144.48 |                                                  |                    |

#### Formula Calculator Element Limits

| Element | Min | Max |
|---------|-----|-----|
| C       | 3   | 60  |
| H       | 0   | 120 |
| O       | 0   | 30  |
| N       | 0   | 10  |

#### Formula Calculator Results

| Formula                                          | CalculatedMass | CalculatedMz | Mz       | Diff. (mDa) | Diff. (ppm) | DBE    |
|--------------------------------------------------|----------------|--------------|----------|-------------|-------------|--------|
| C <sub>19</sub> H <sub>25</sub> N O <sub>2</sub> | 299.1885       | 300.1958     | 300.1943 | 1.4         | 4.7         | 8.0000 |

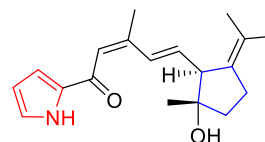

Chemical Formula: C<sub>19</sub>H<sub>25</sub>NO<sub>2</sub>  
Exact Mass: 299.1885

--- End Of Report ---

Figure S73. HR-ESI-MS spectrum of 5.

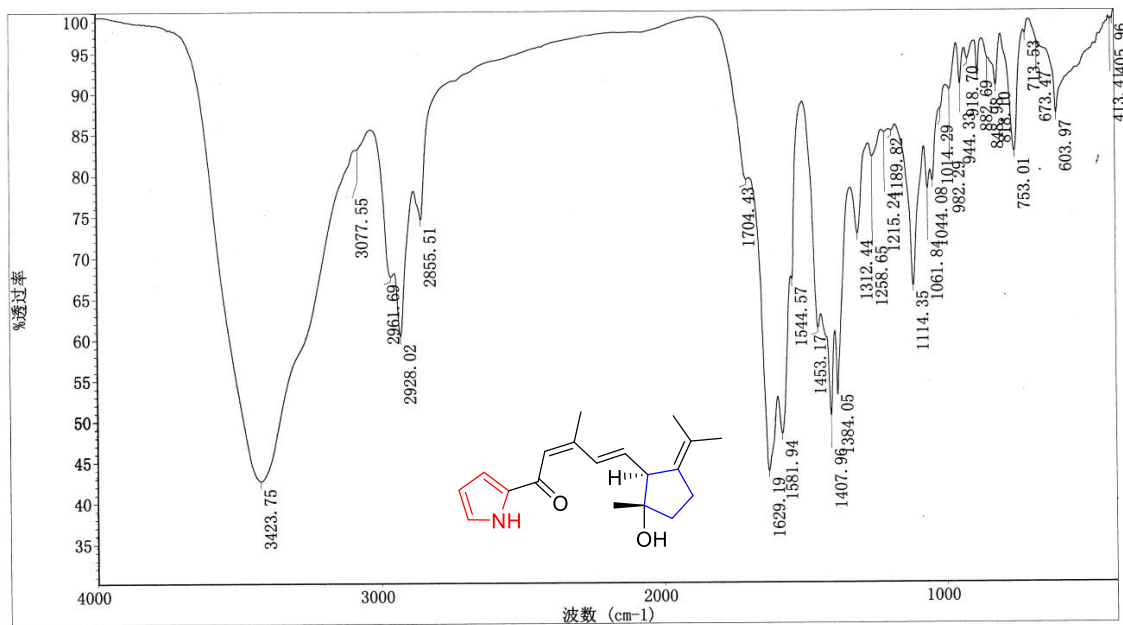

Figure S74. IR spectrum of 5.
